# Supplementary figures and images for: Selective synthesis of 2,5-disubstituted furan-3-carboxylates and the isomeric 2,4-disubstituted furan-3-carboxylates
Source: Royal Society of Chemistry journal article supplement (doi:10.1039/c5ra14273c), 2015-01-01

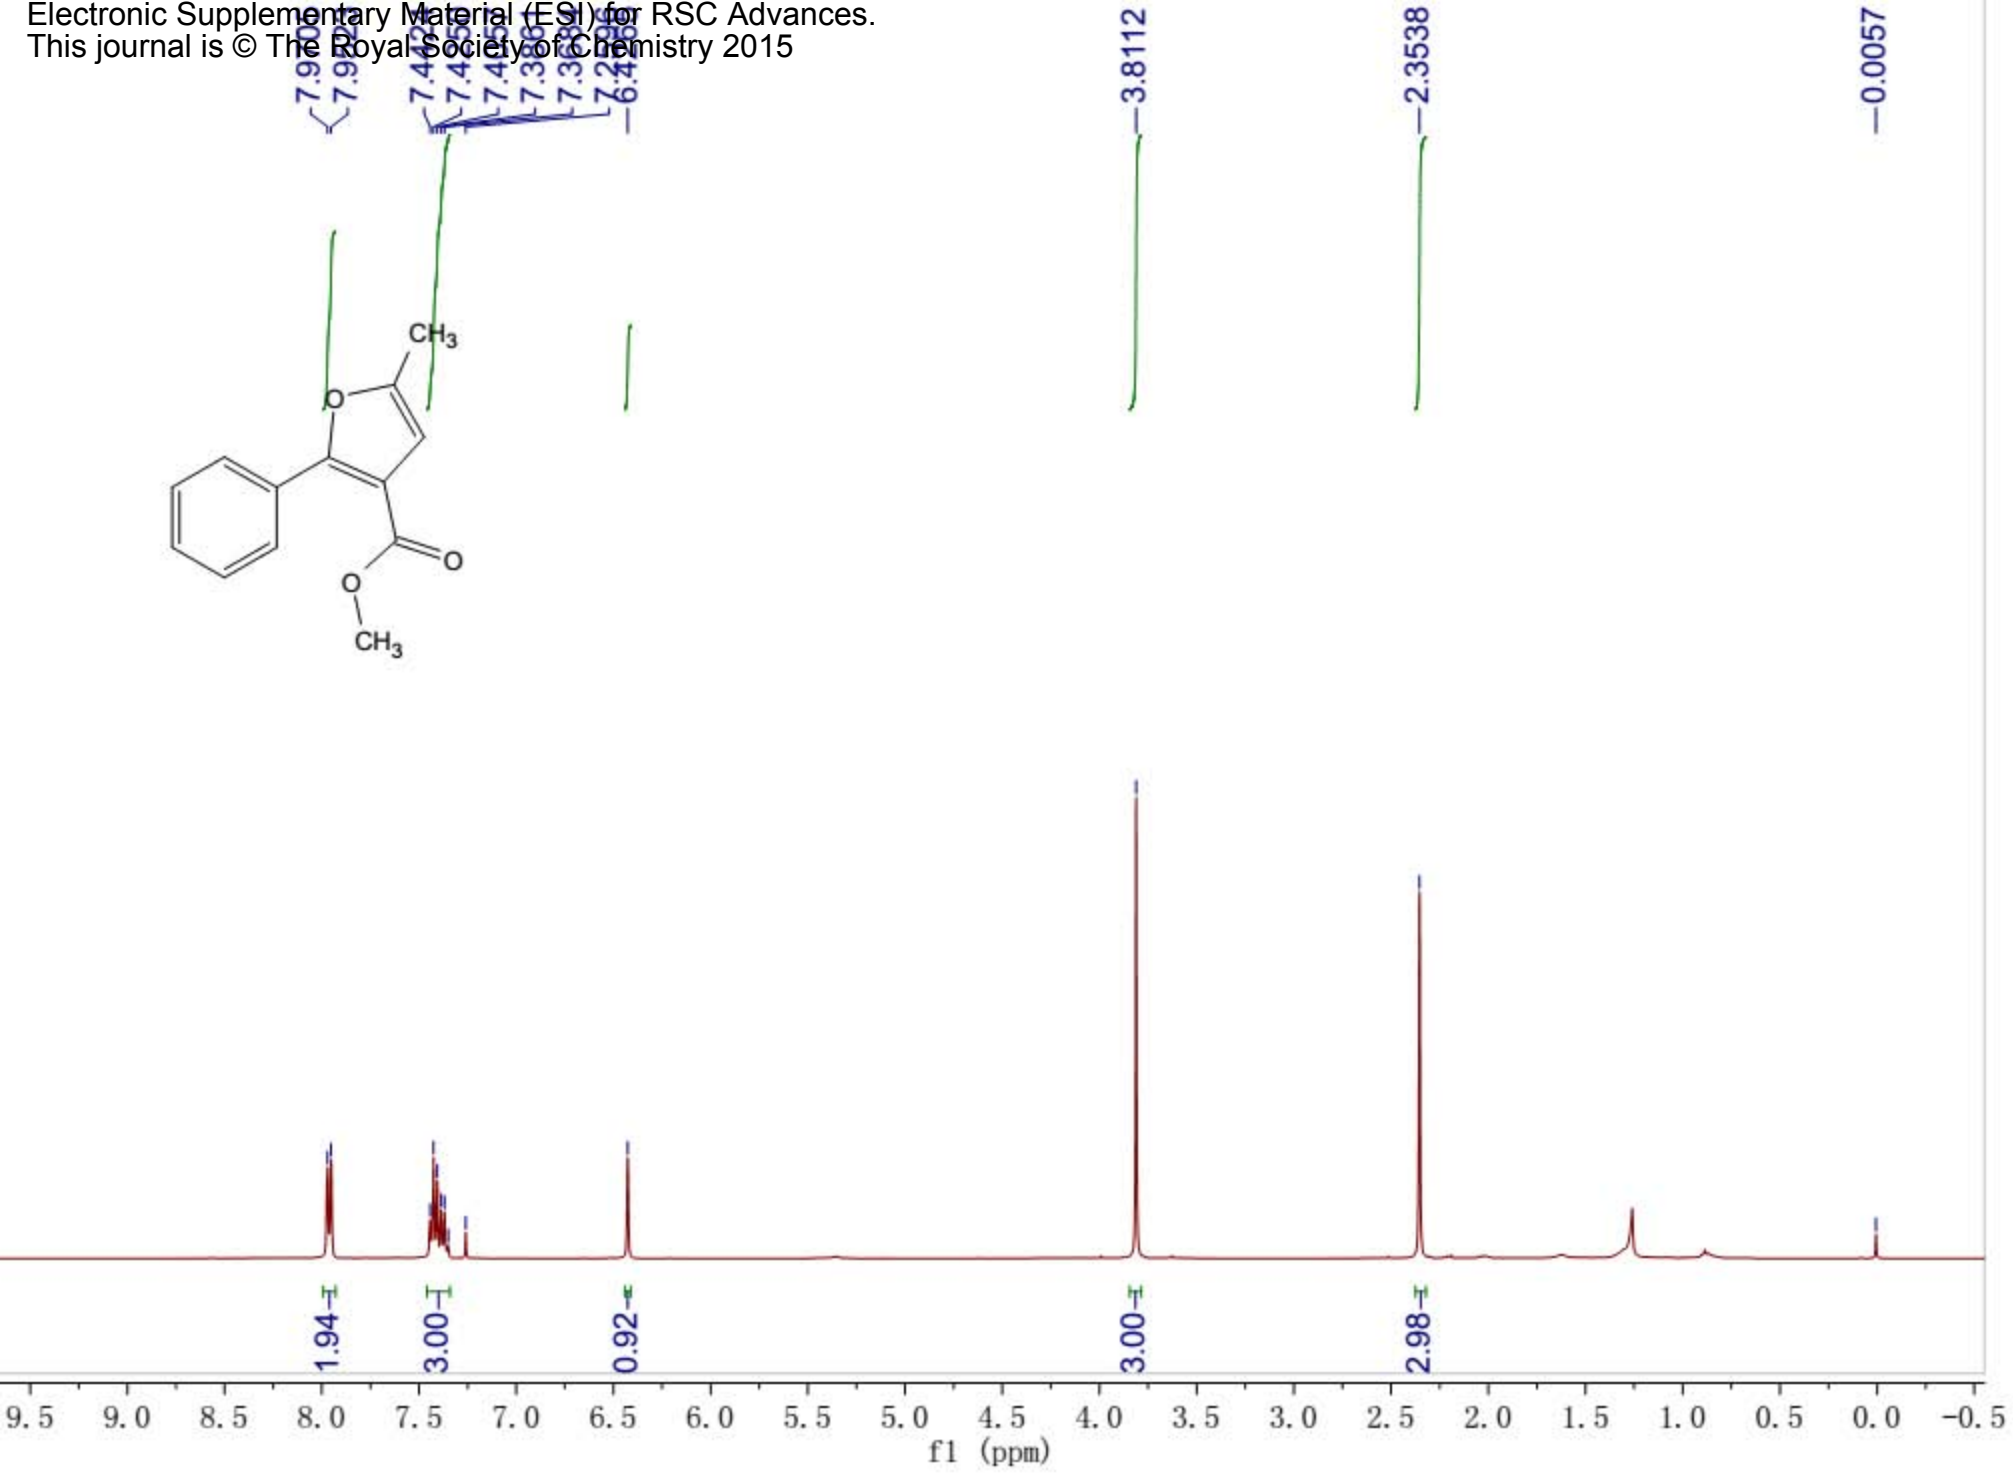

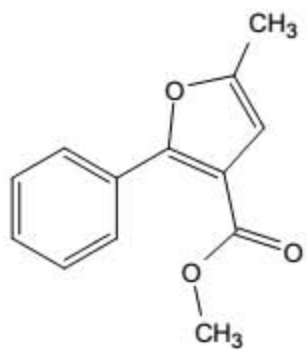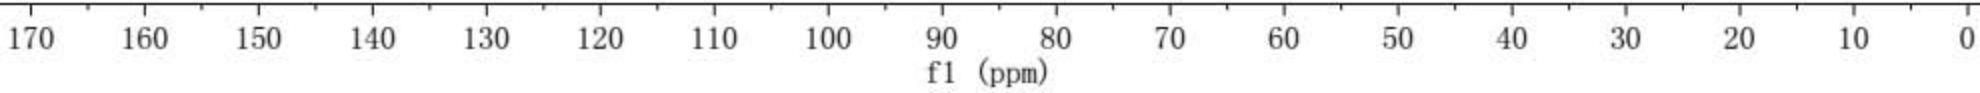

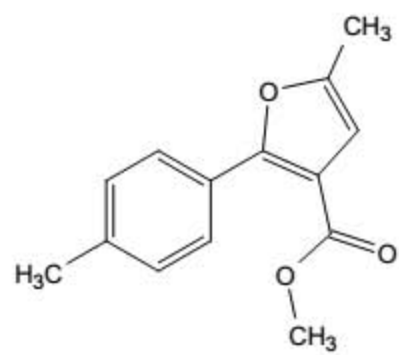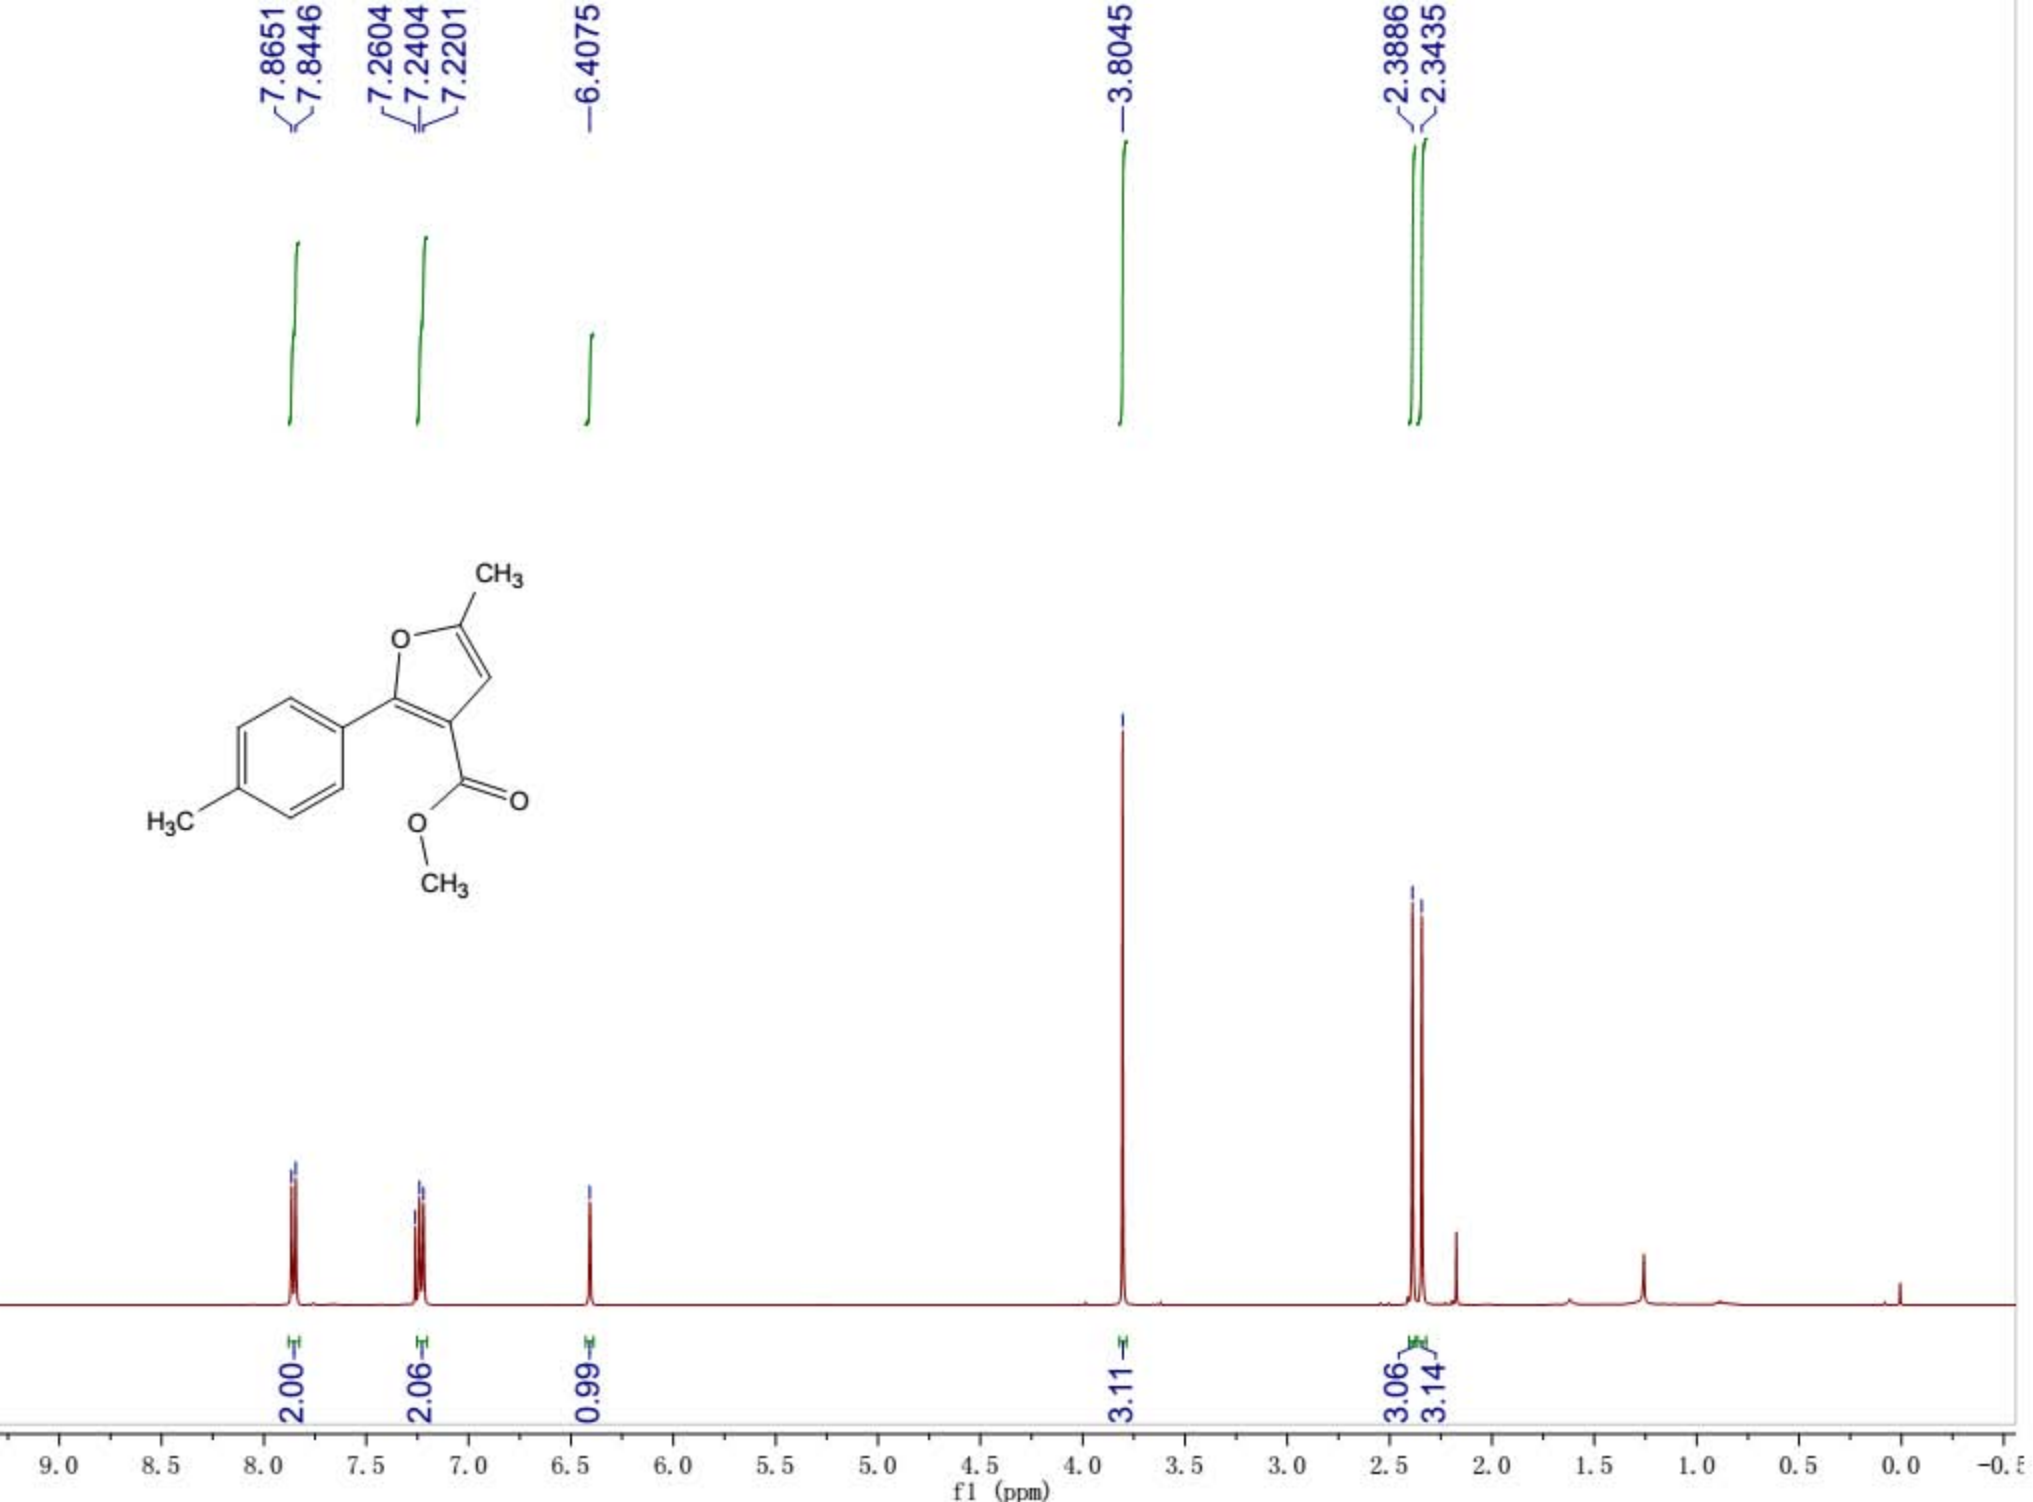

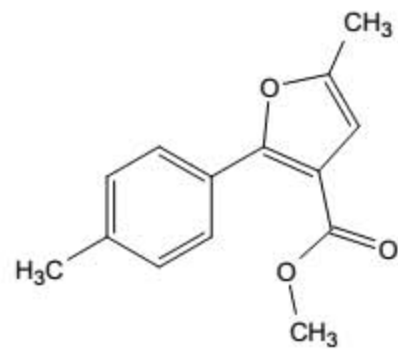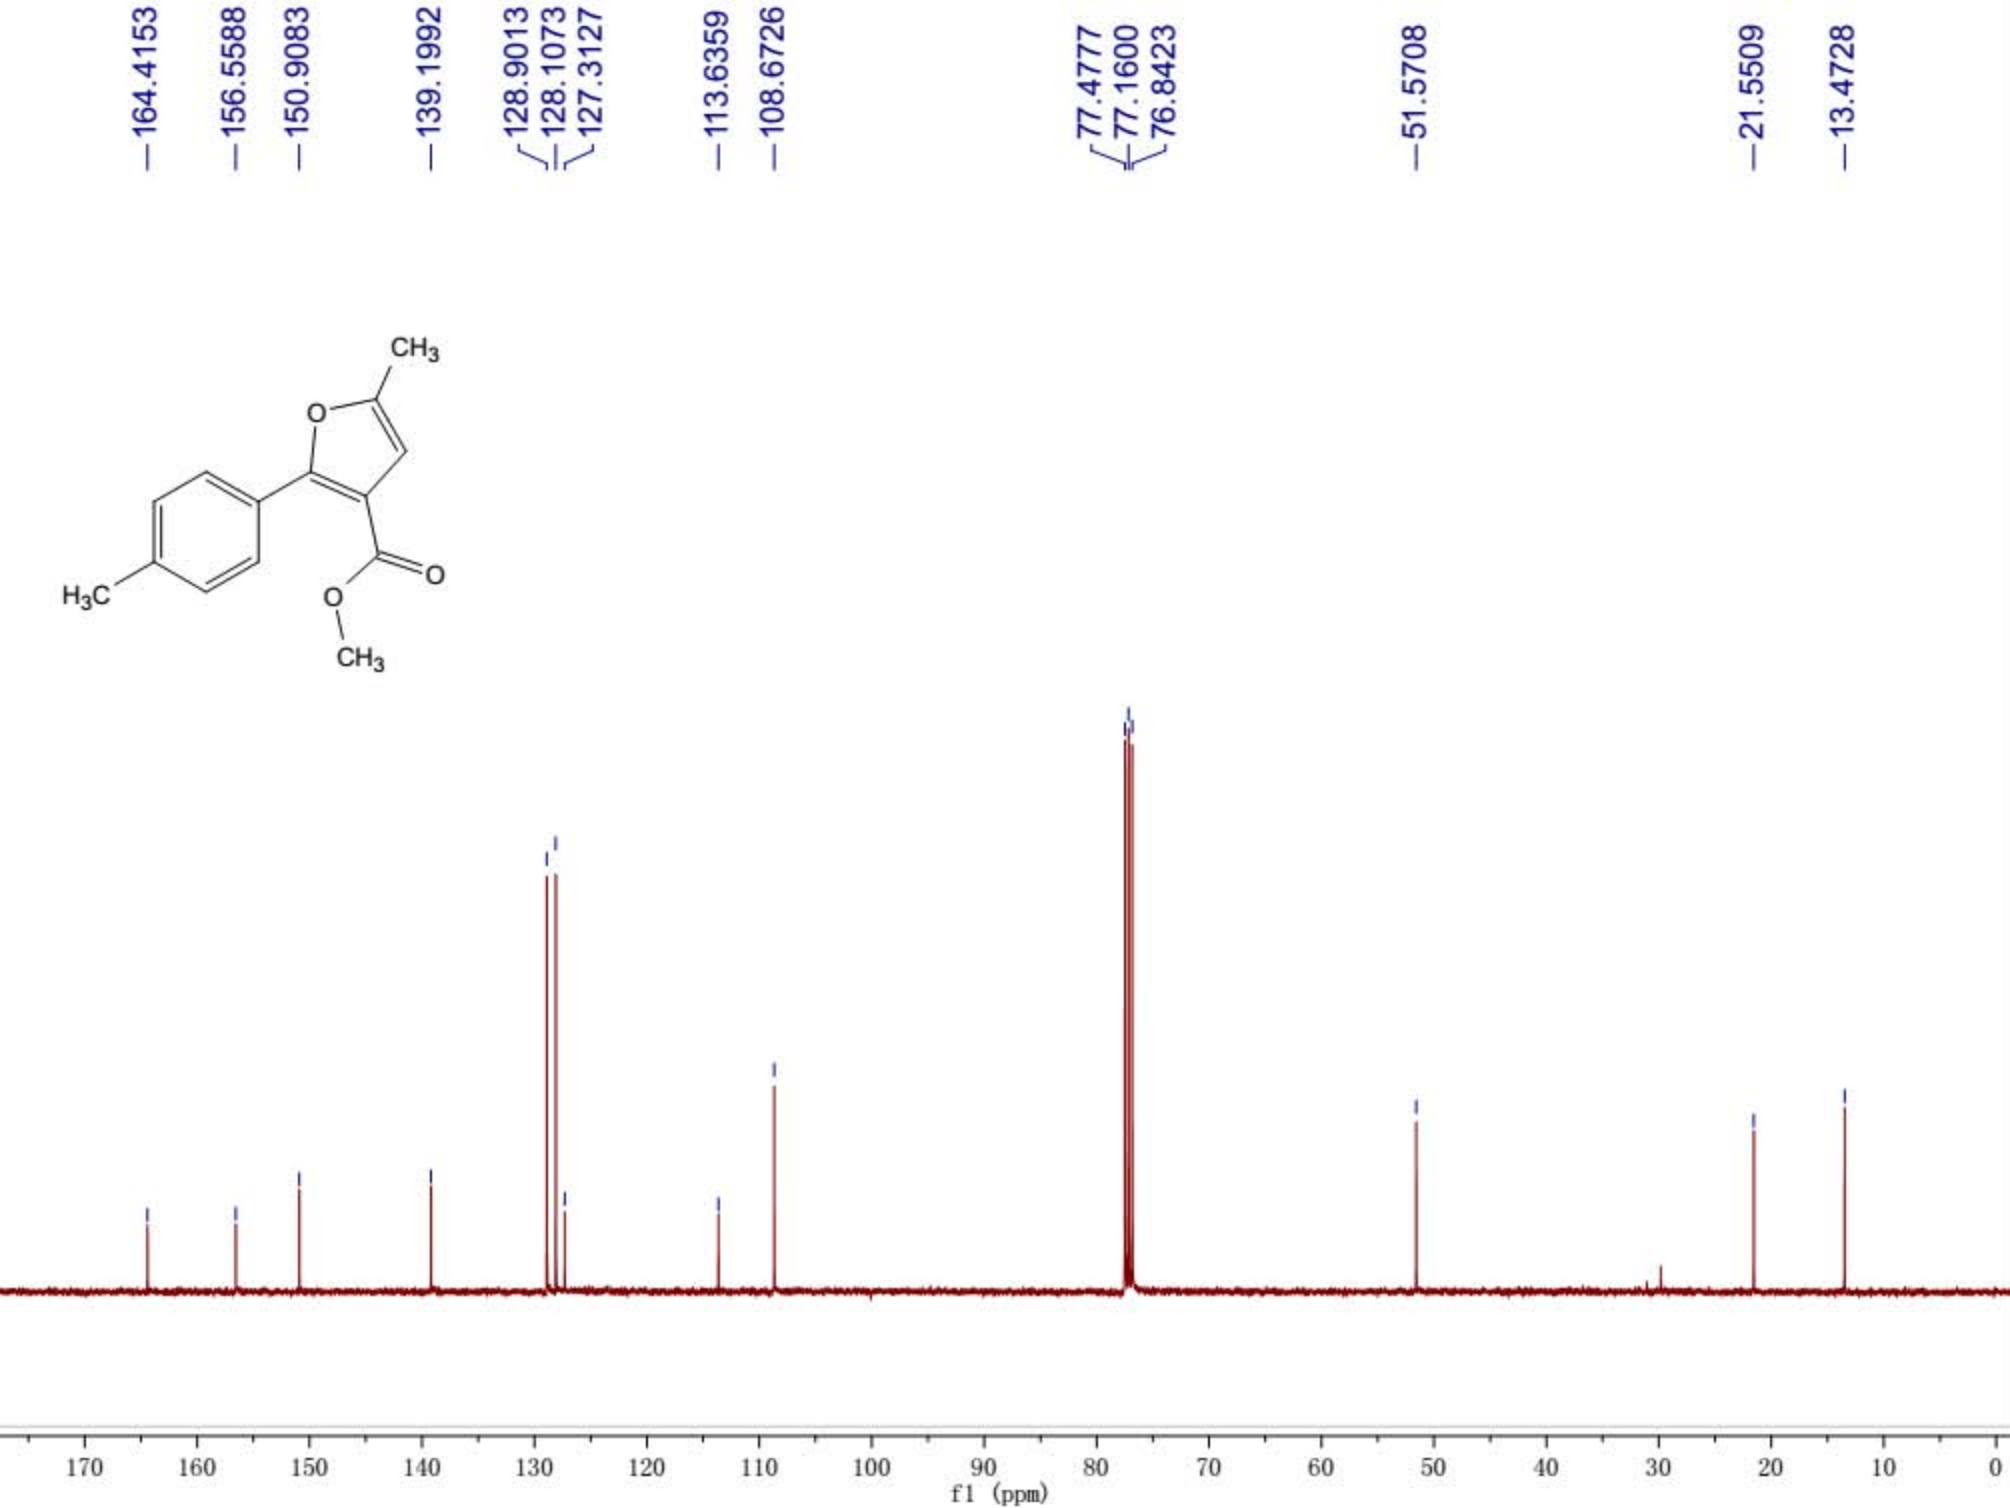

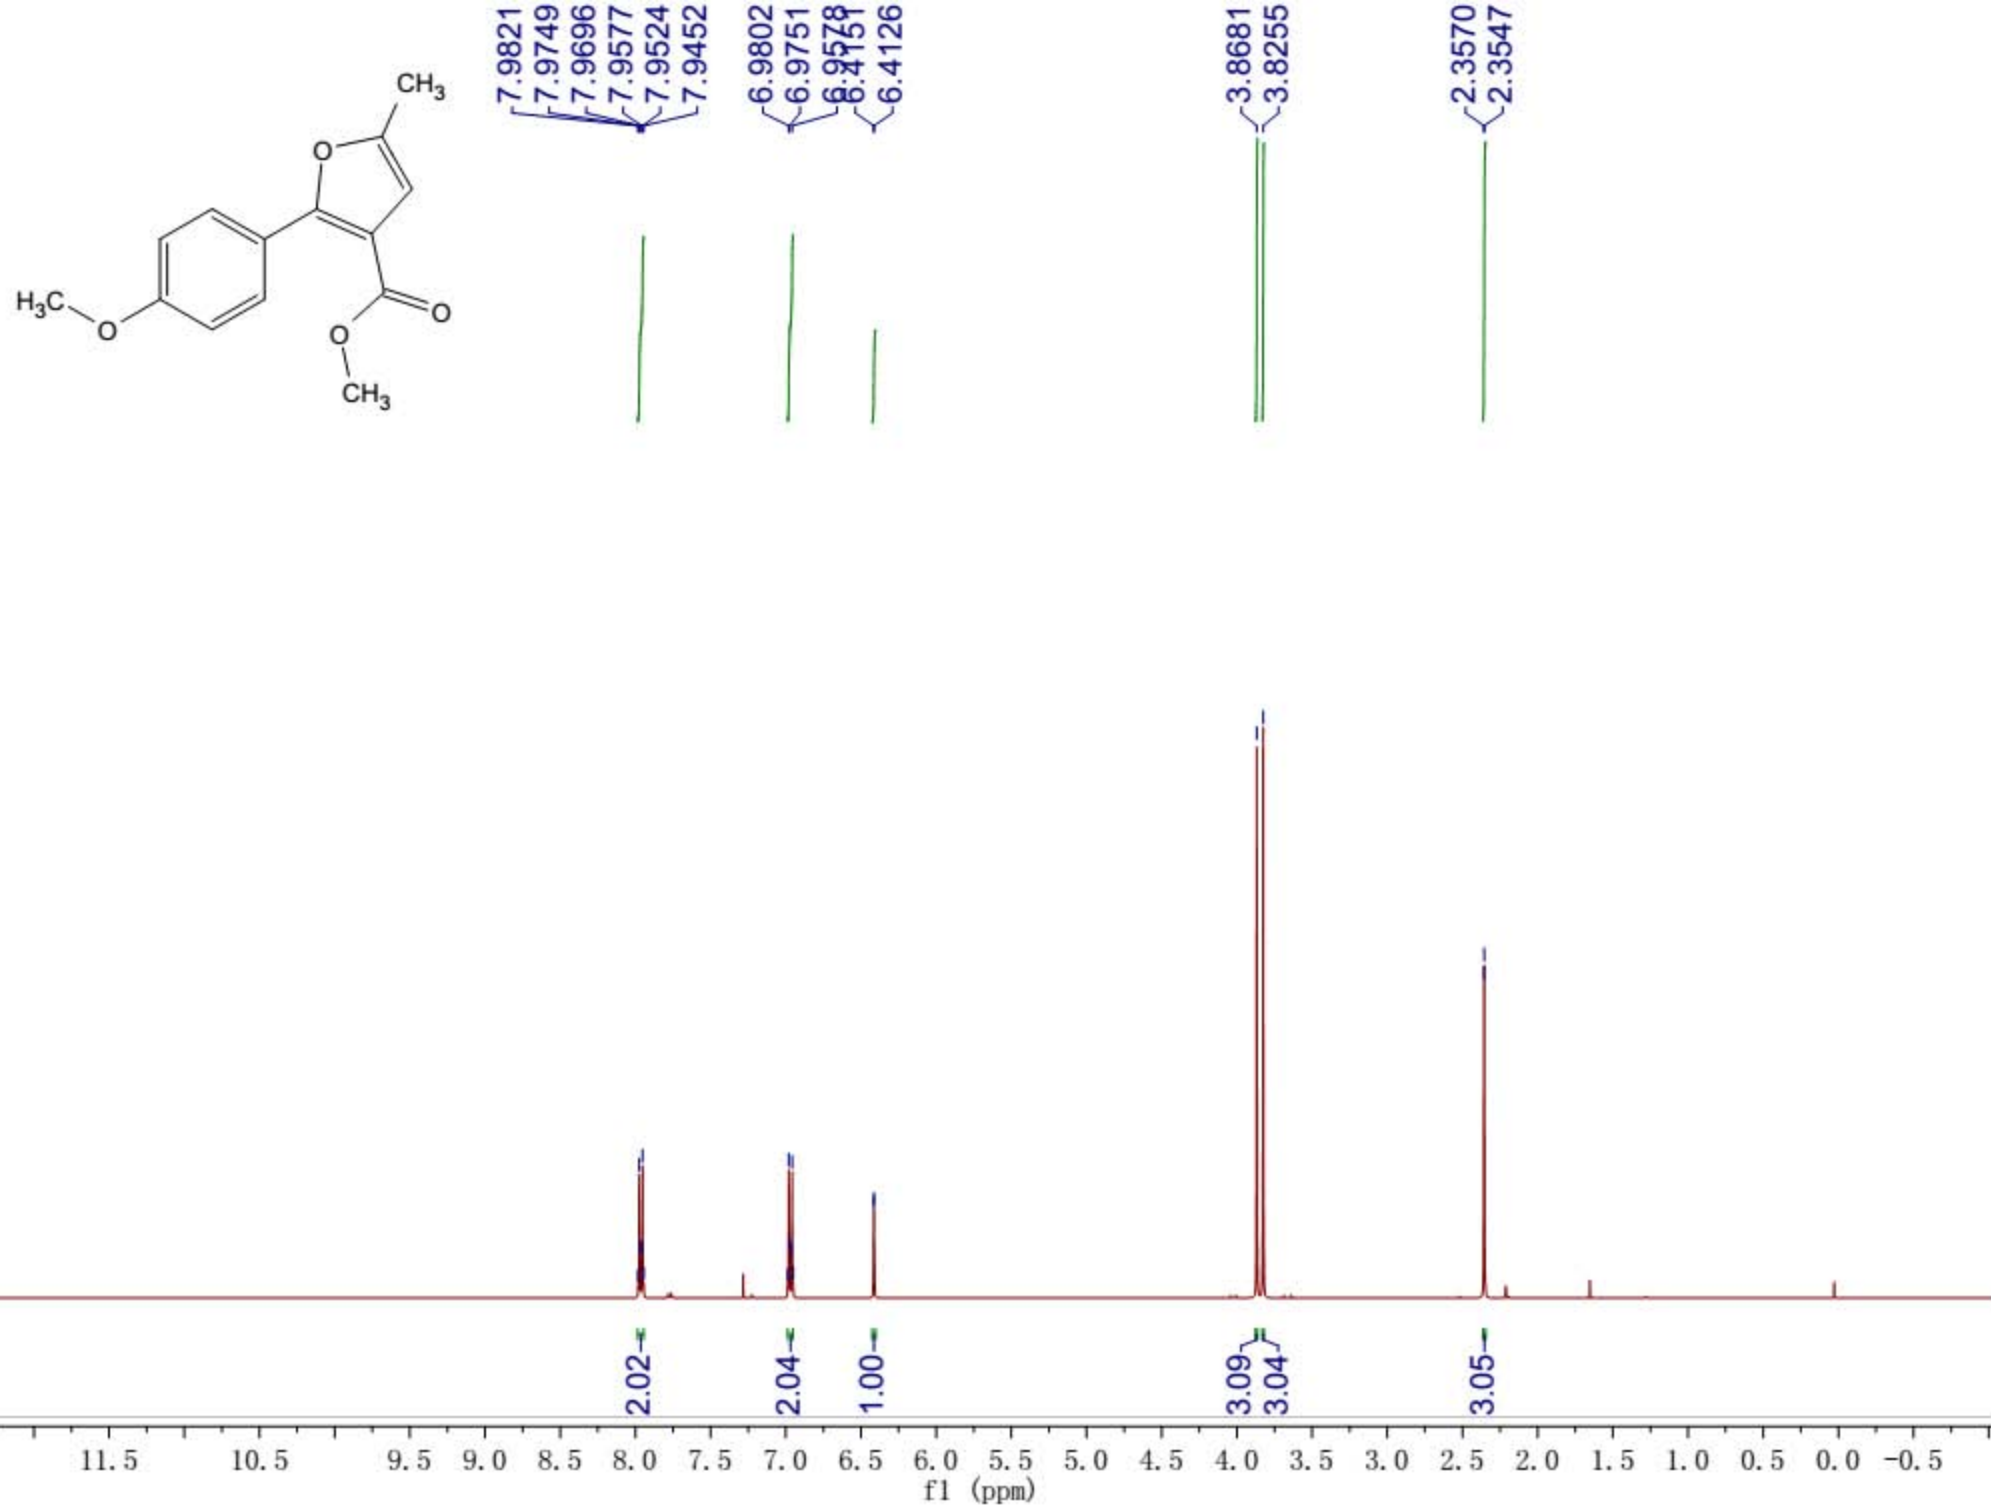

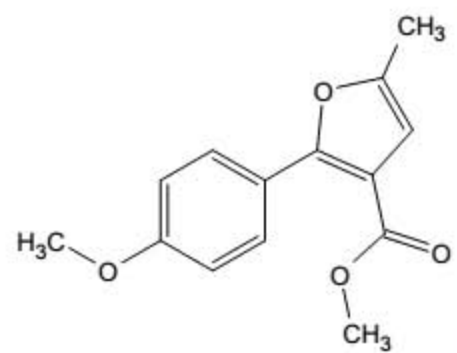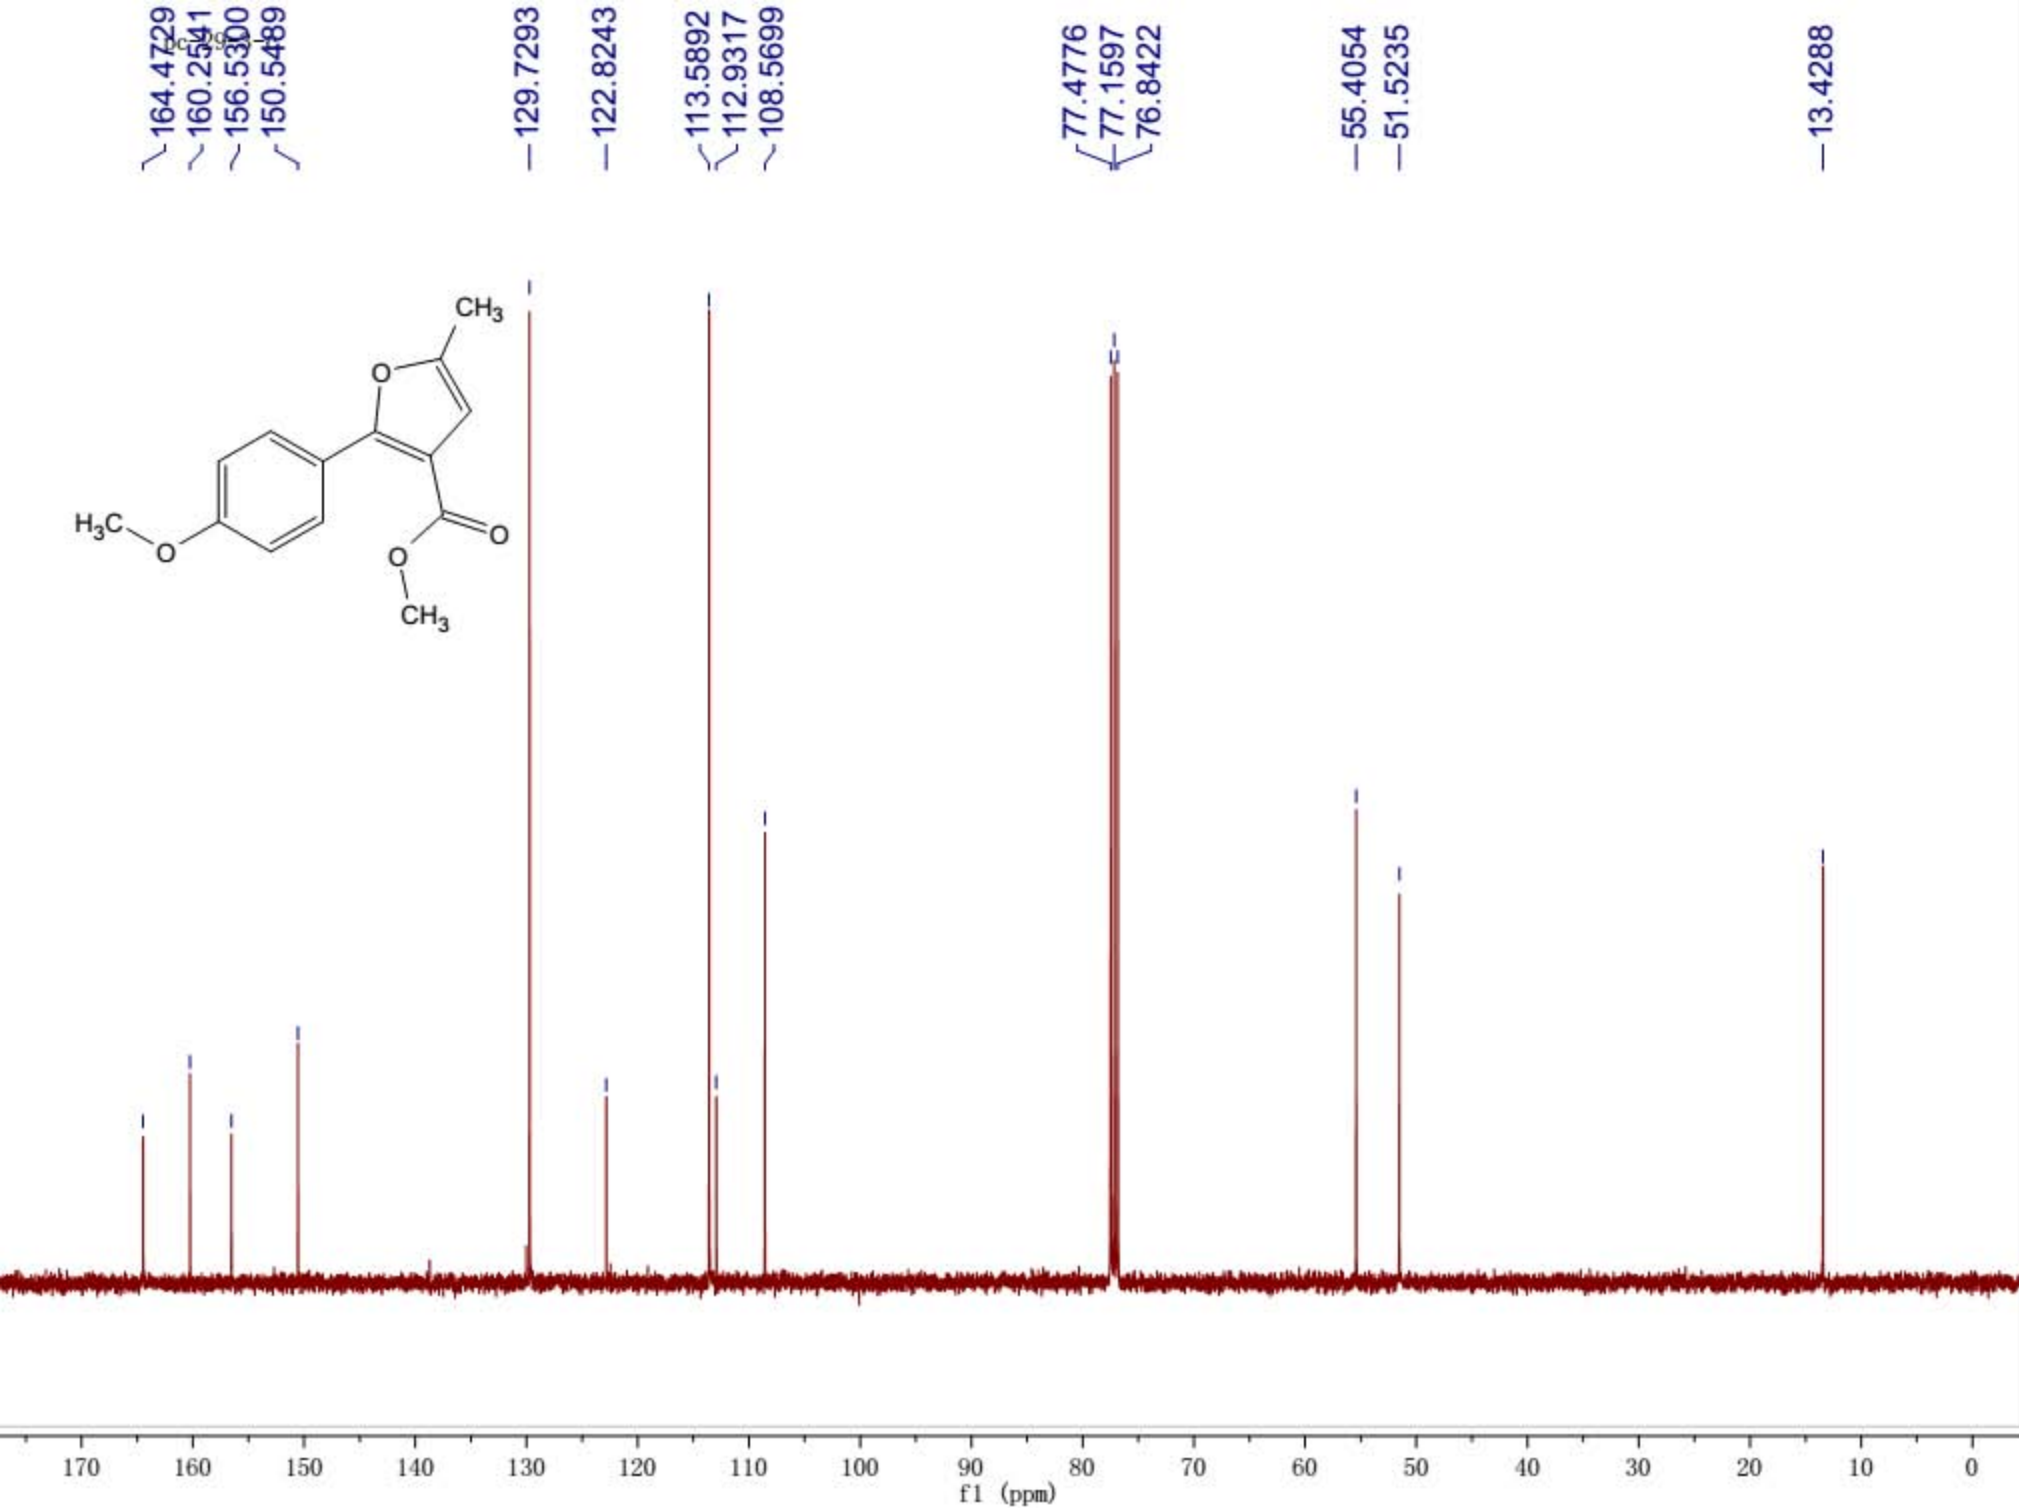

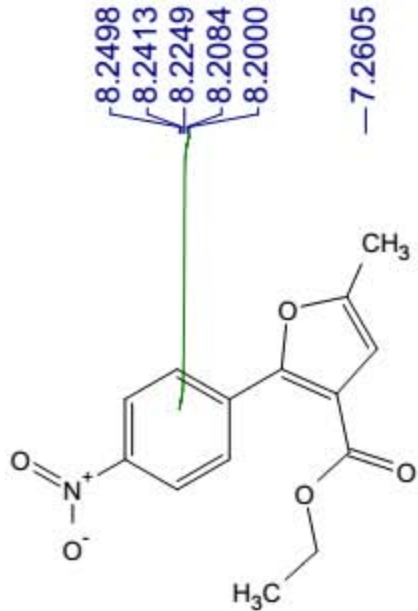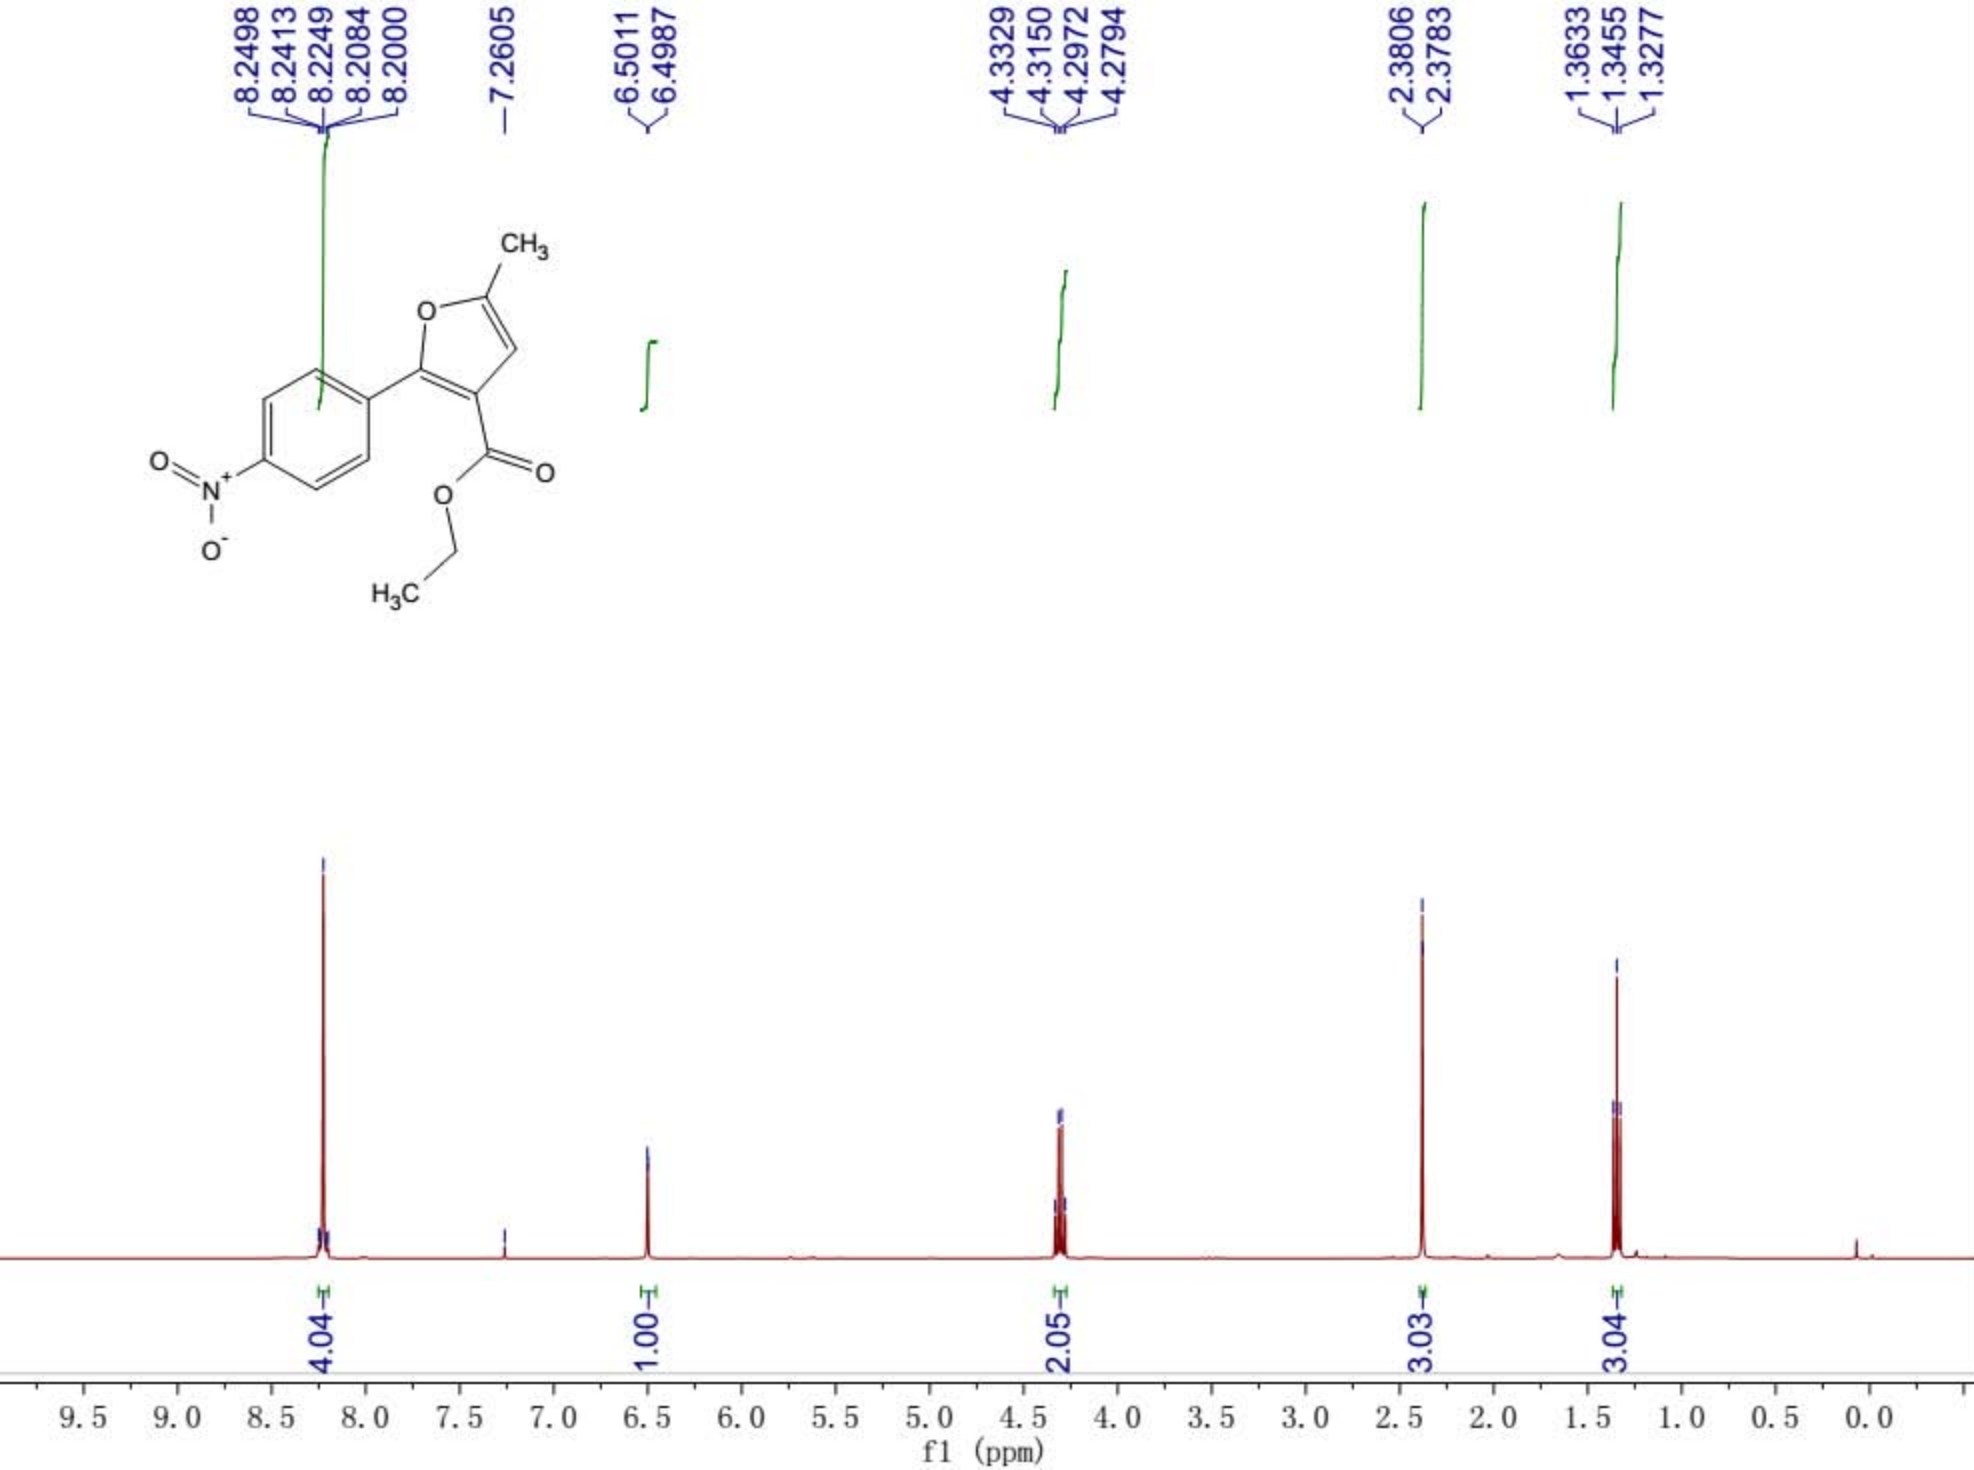

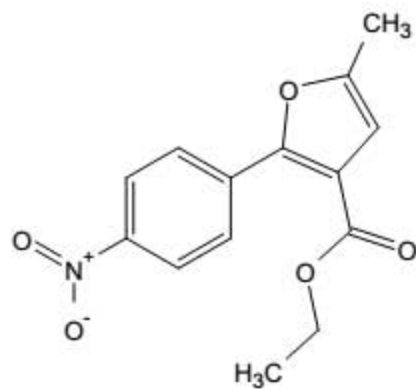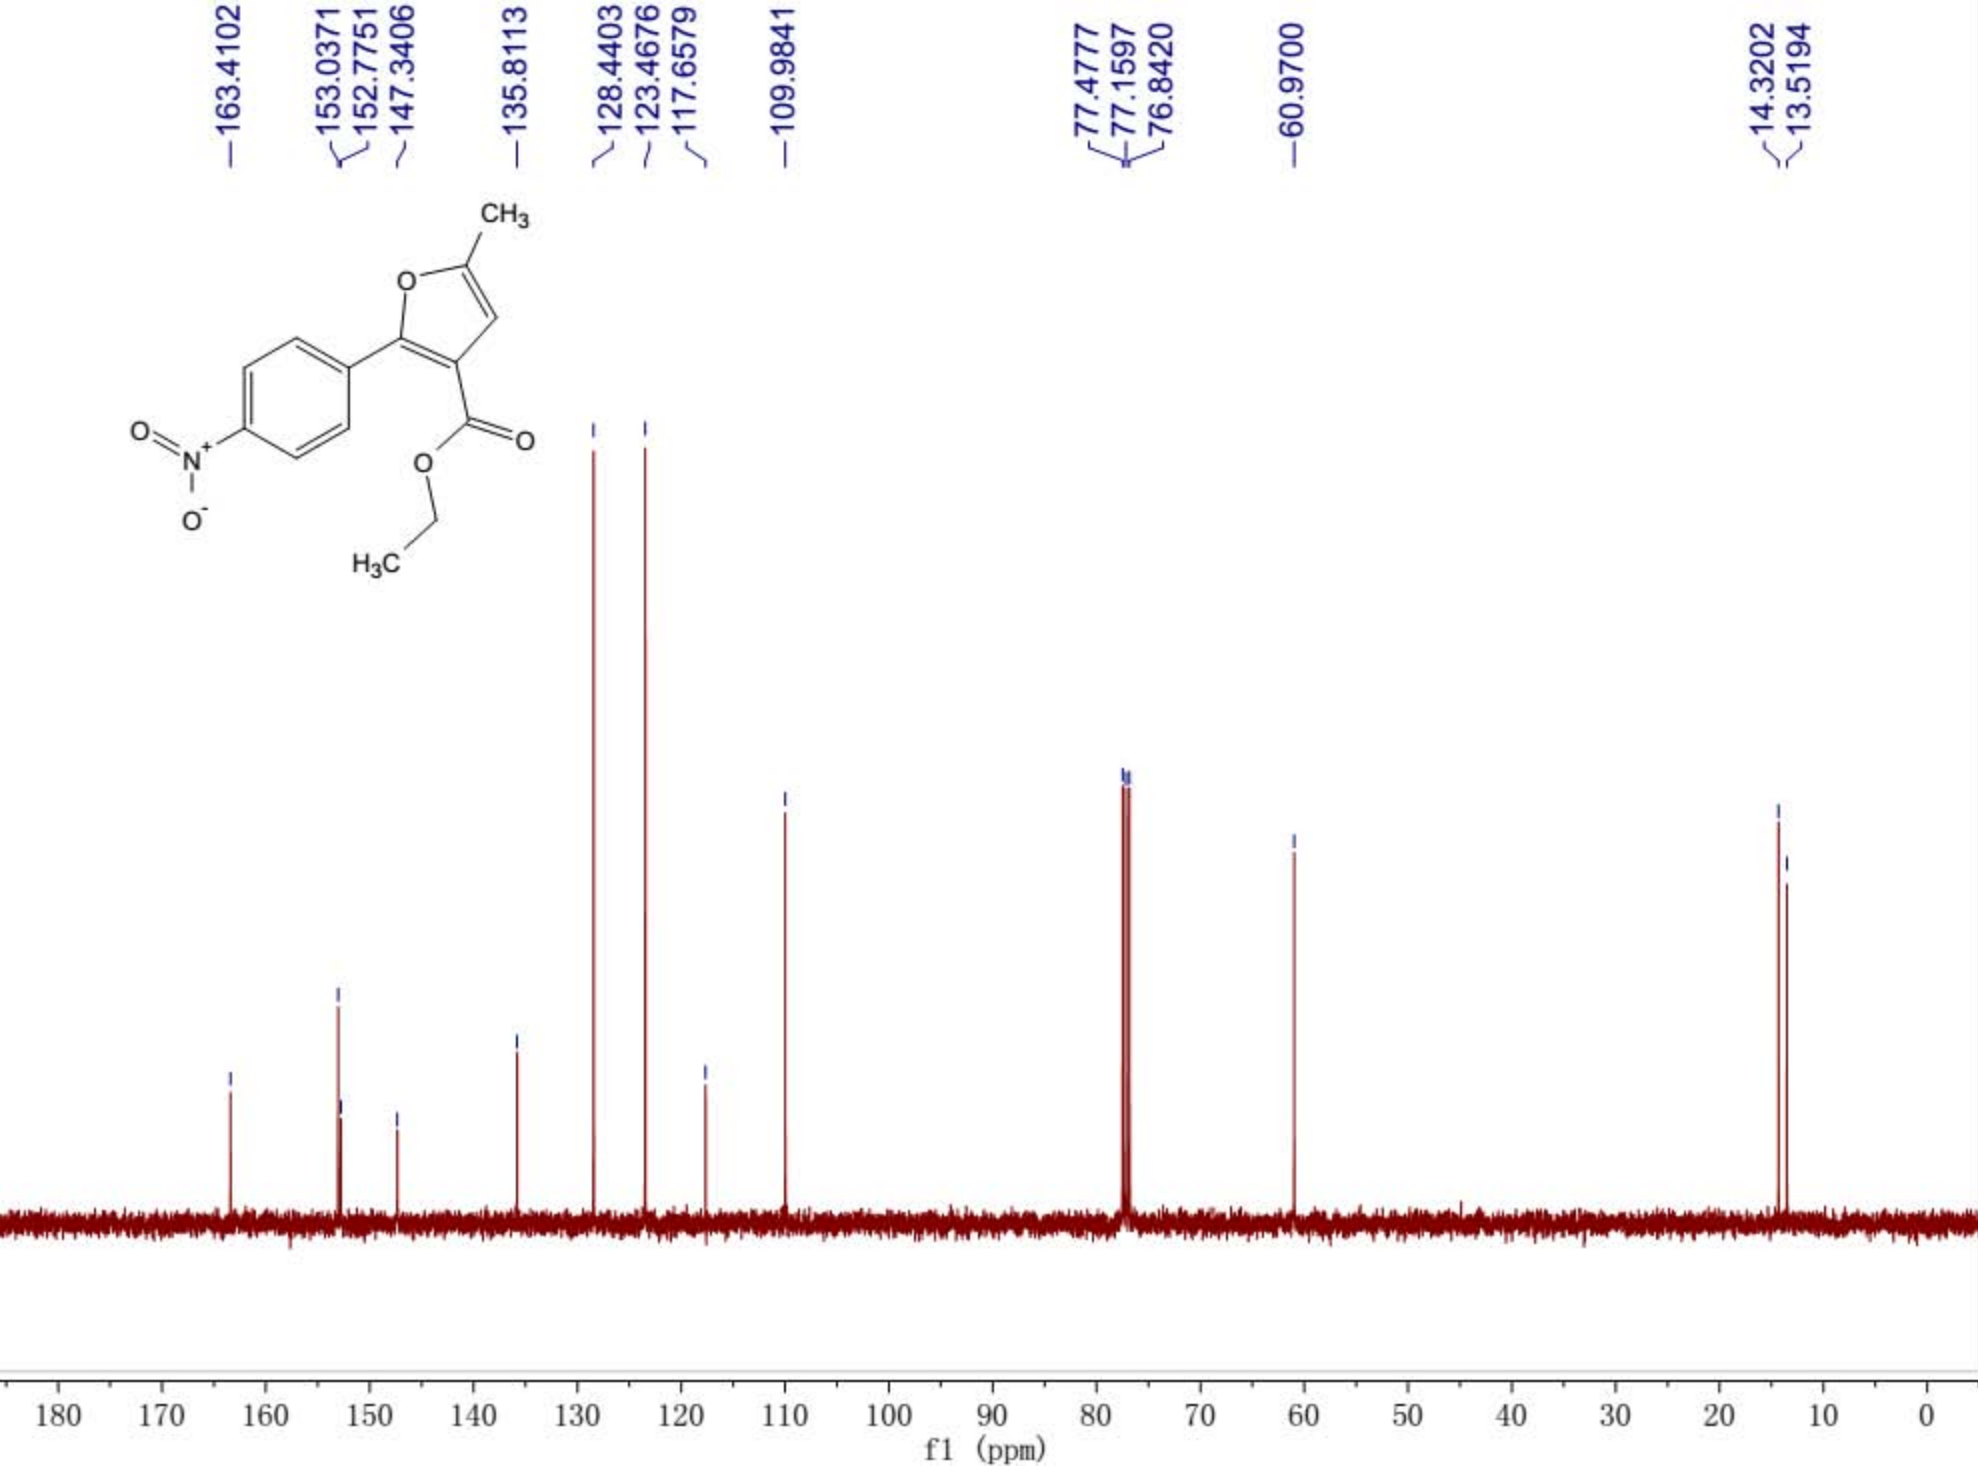



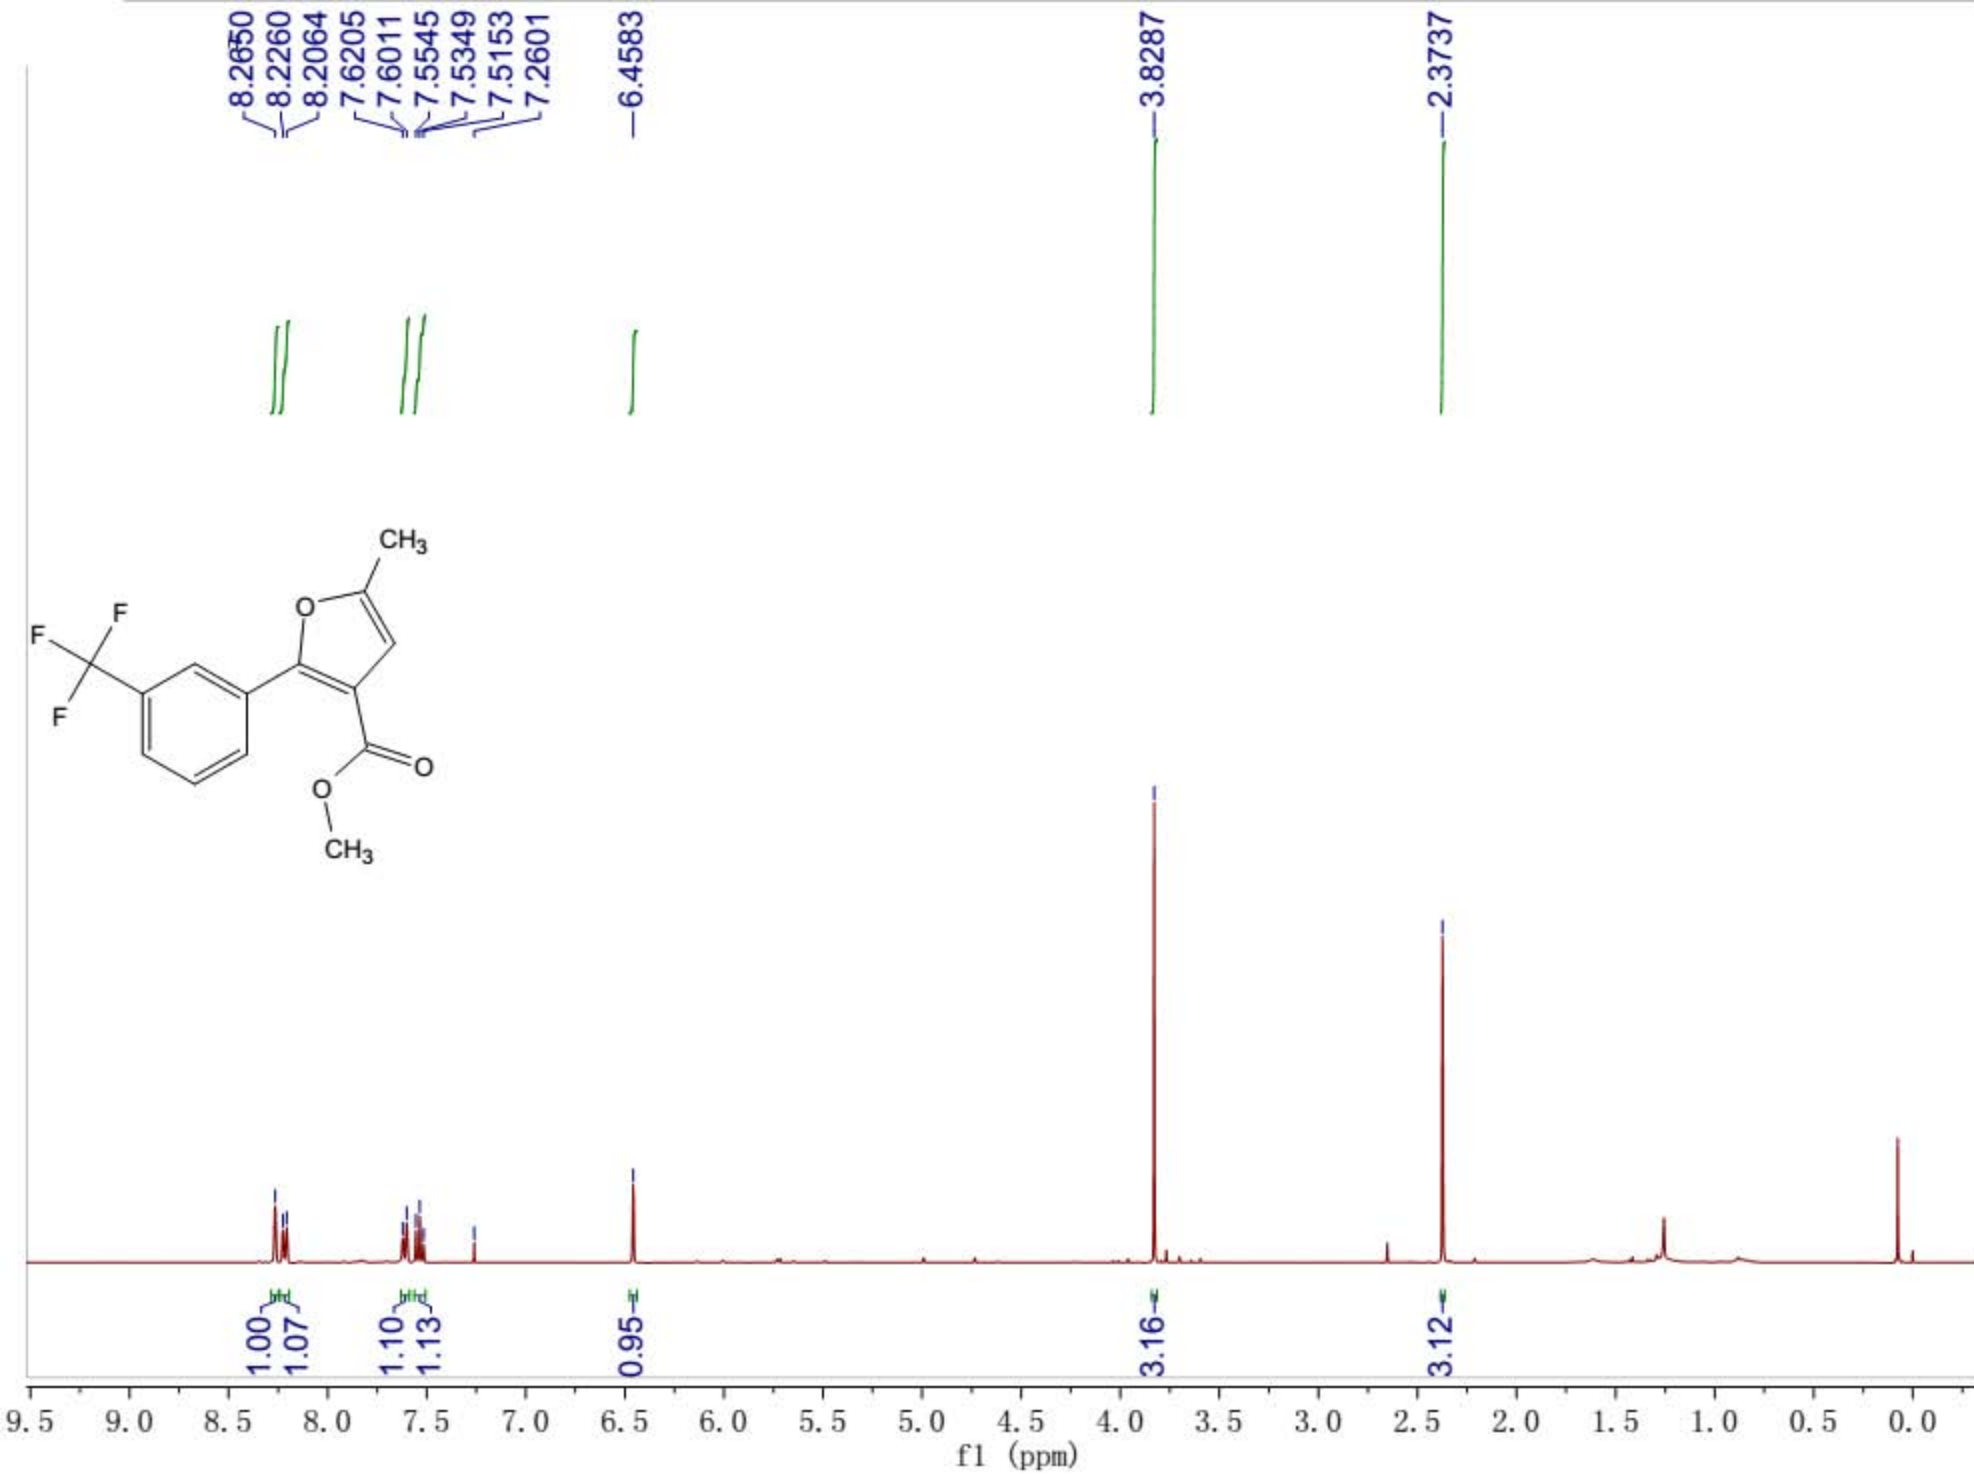

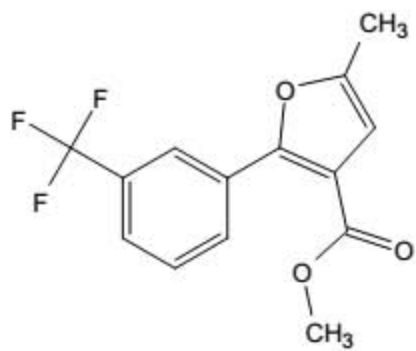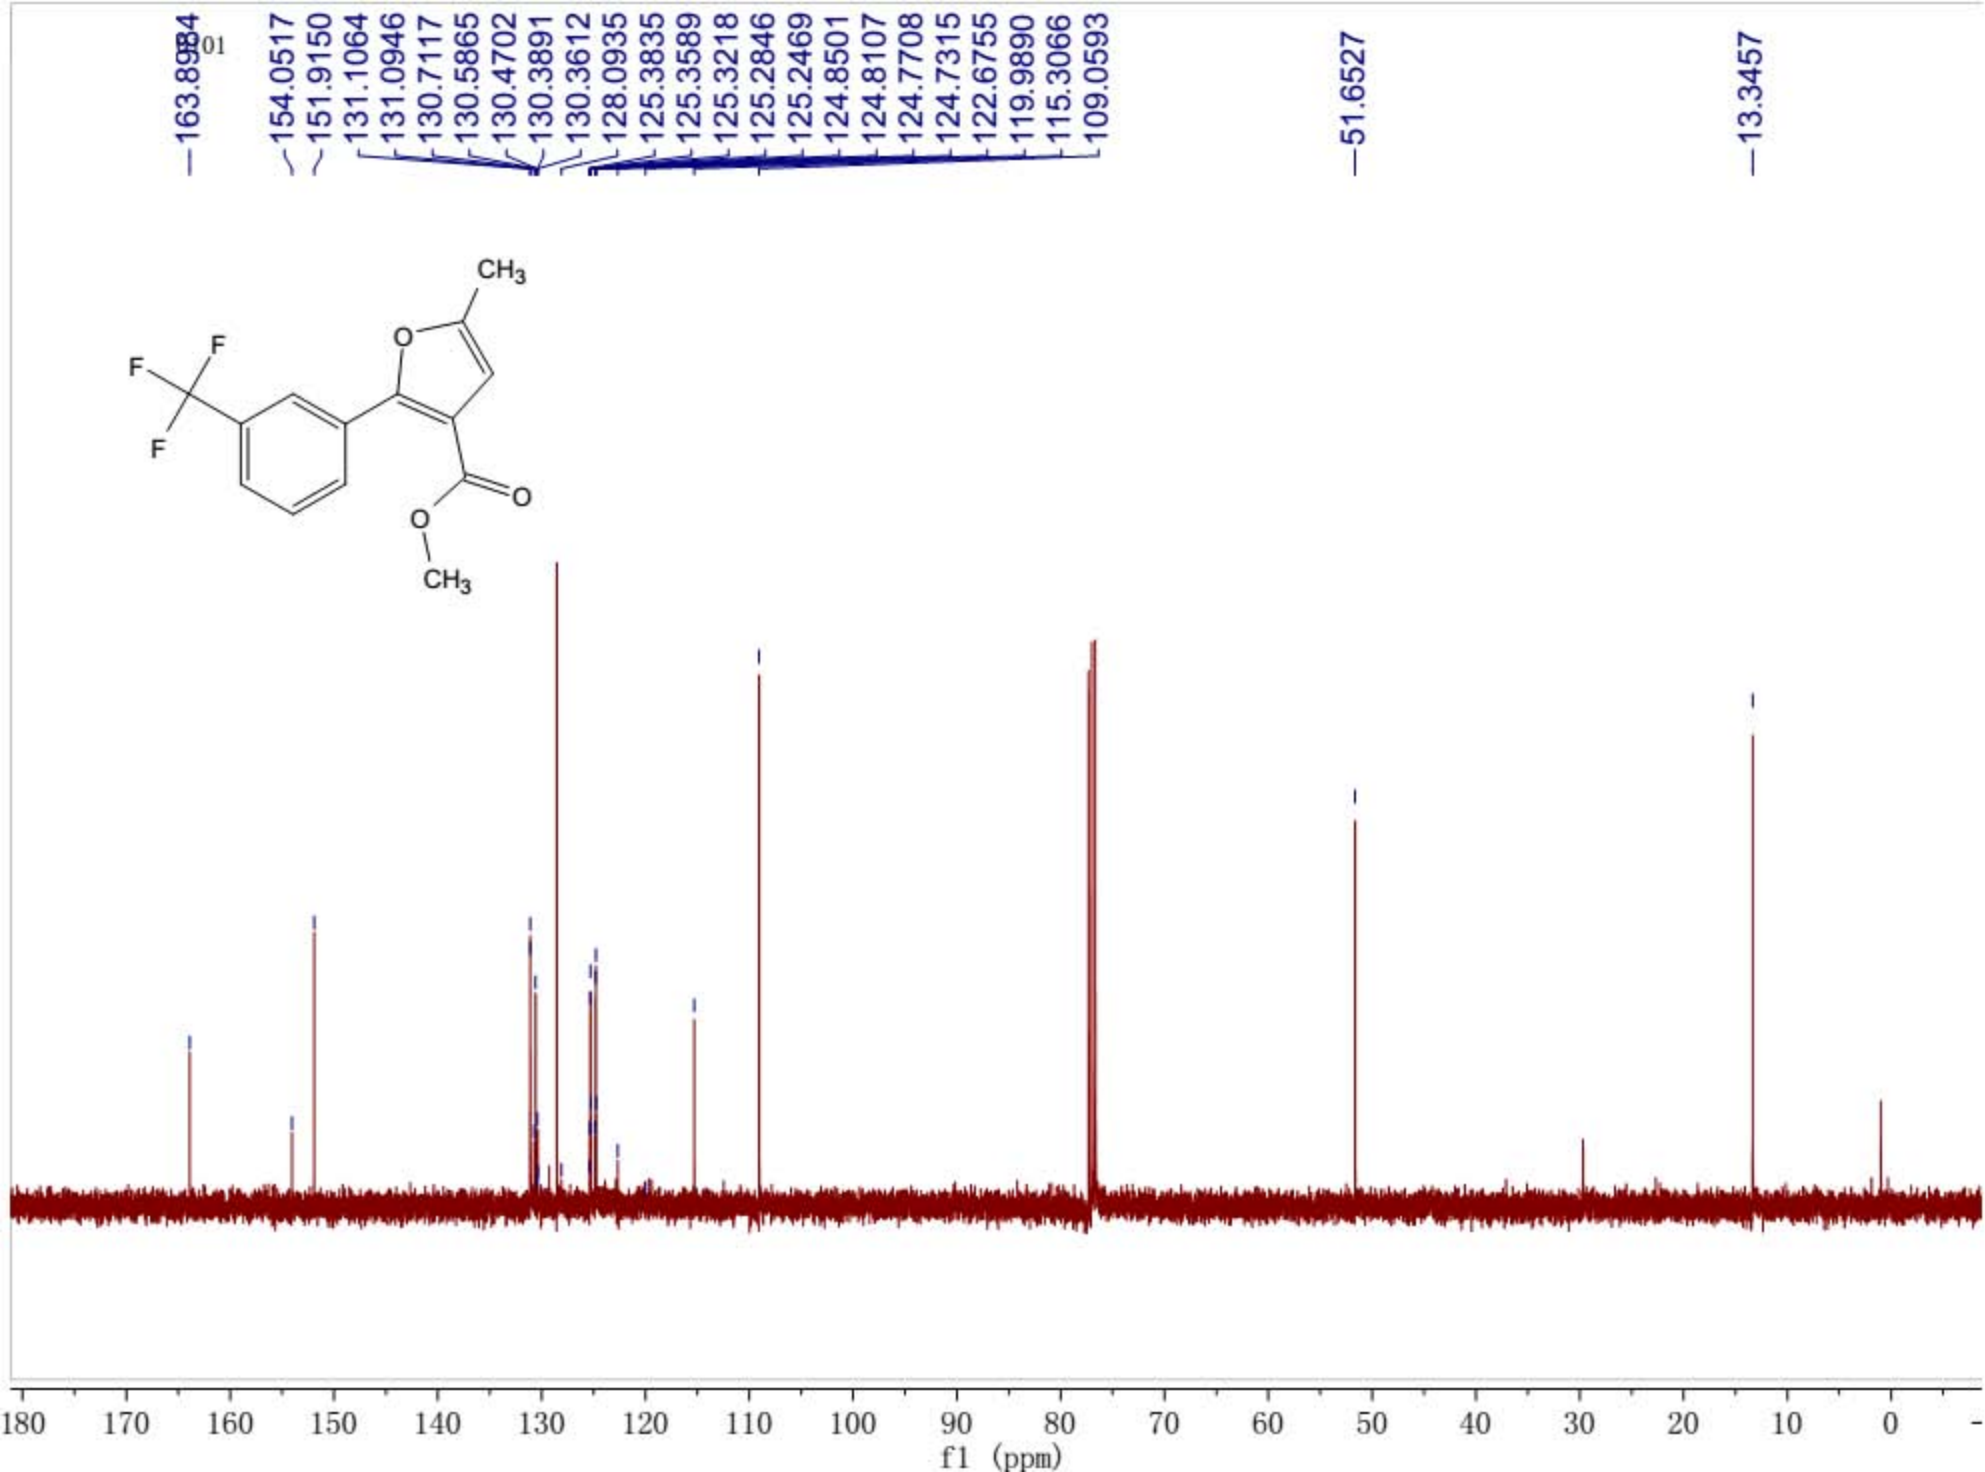

7.5843  
7.5819  
7.5644  
7.5619  
7.3801  
7.3757  
7.3610  
7.3567  
7.3071  
7.3042  
7.2884  
7.2856  
7.2695  
7.2666  
7.2185  
7.2140  
7.1987  
7.1944  
7.1803  
7.1756  
6.3611  
6.3587

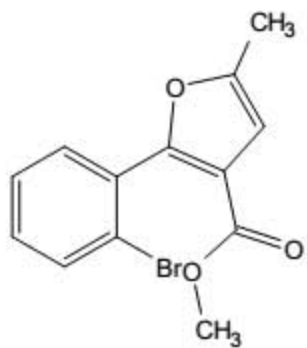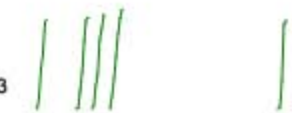

1.00  
1.03  
1.06  
1.12  
0.99

3.6207  
2.2776  
2.2753

3.18  
3.16

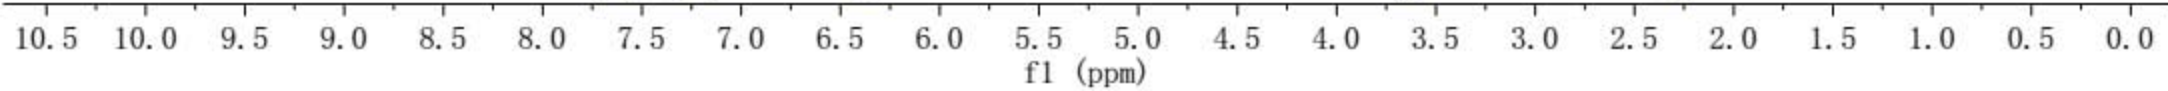

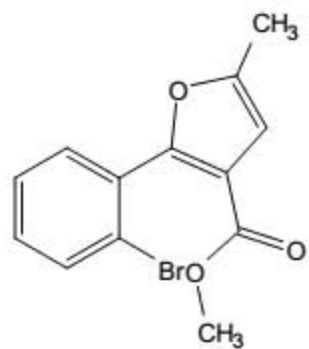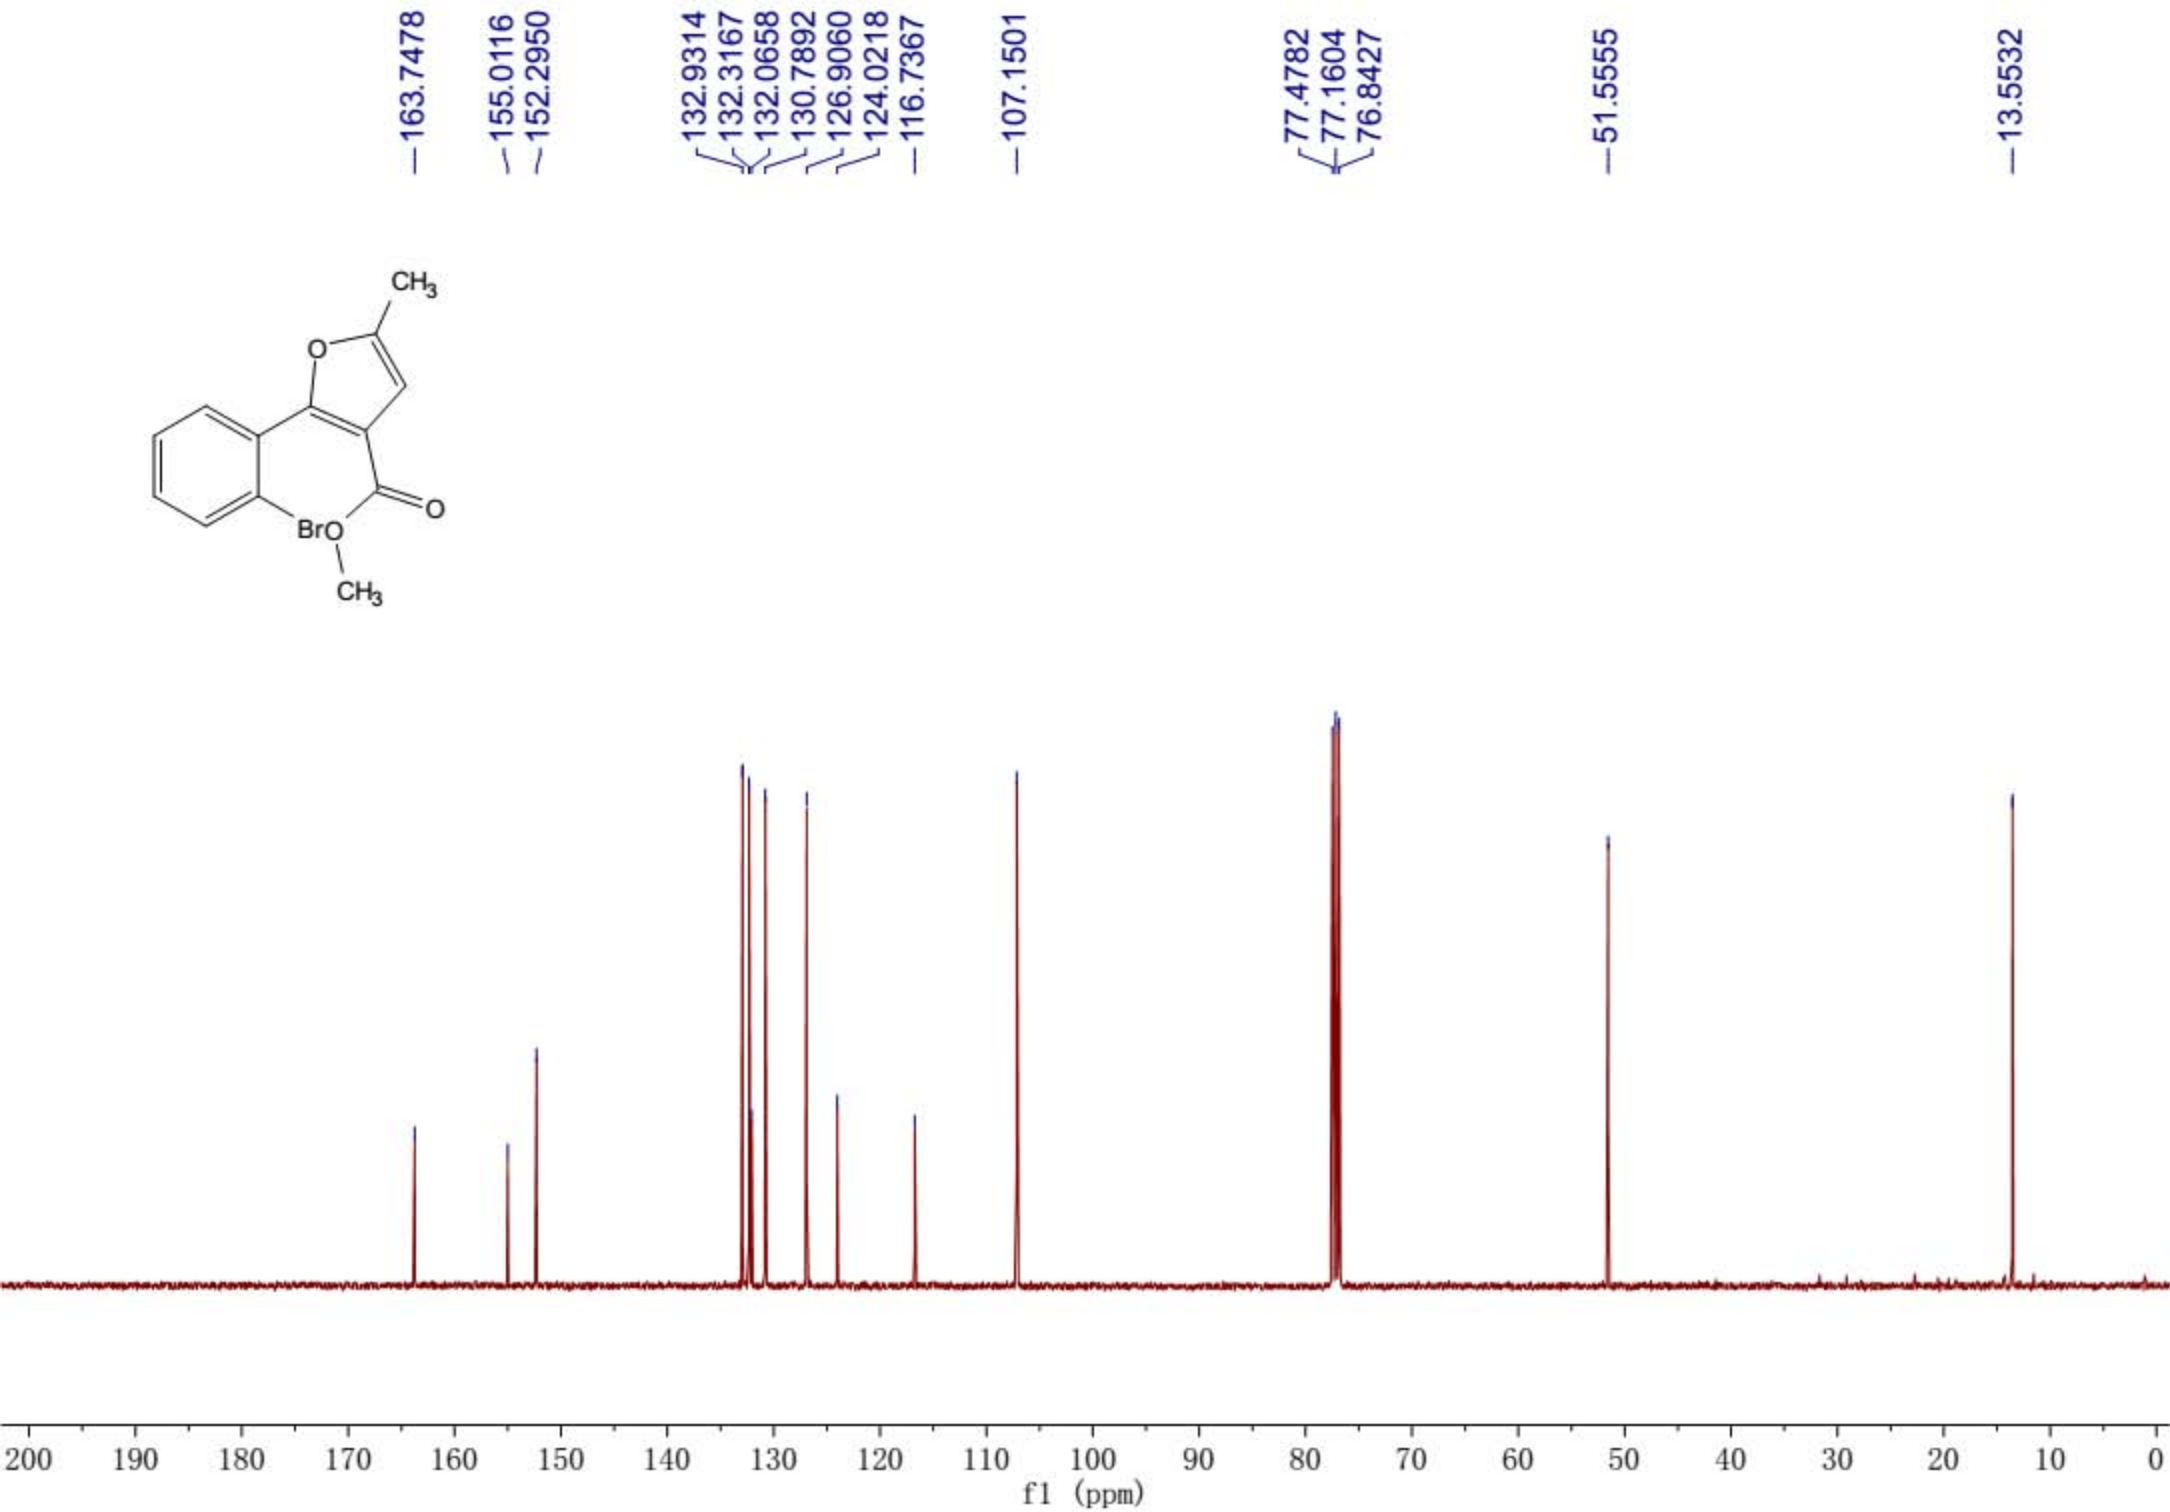

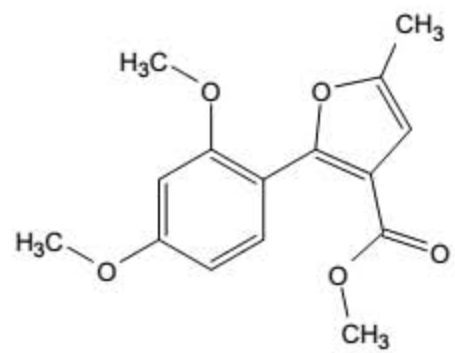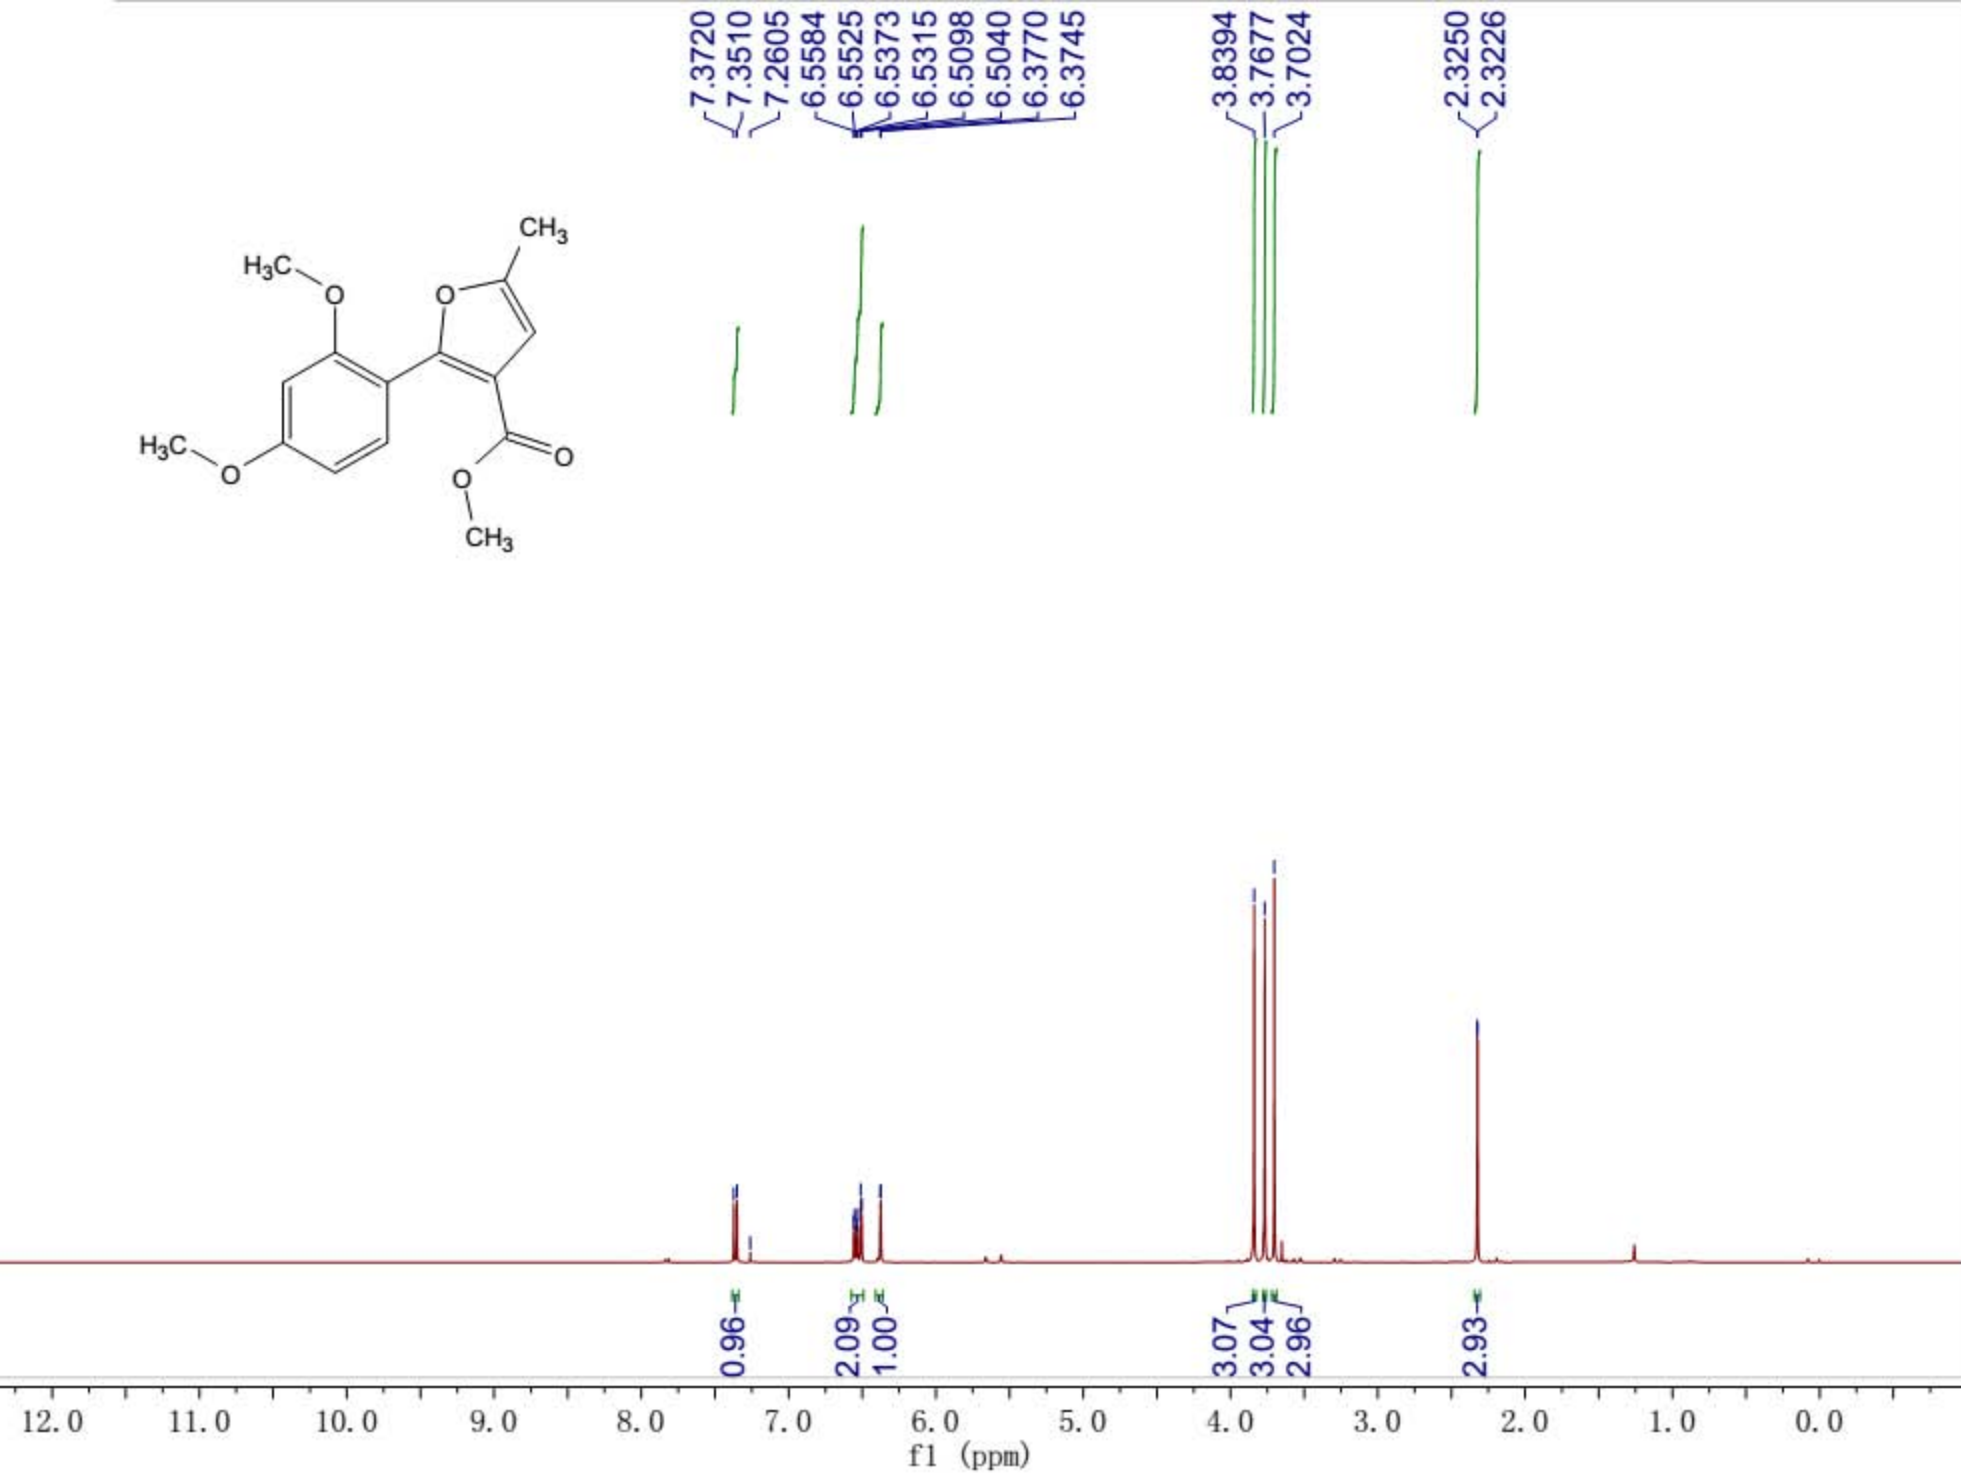

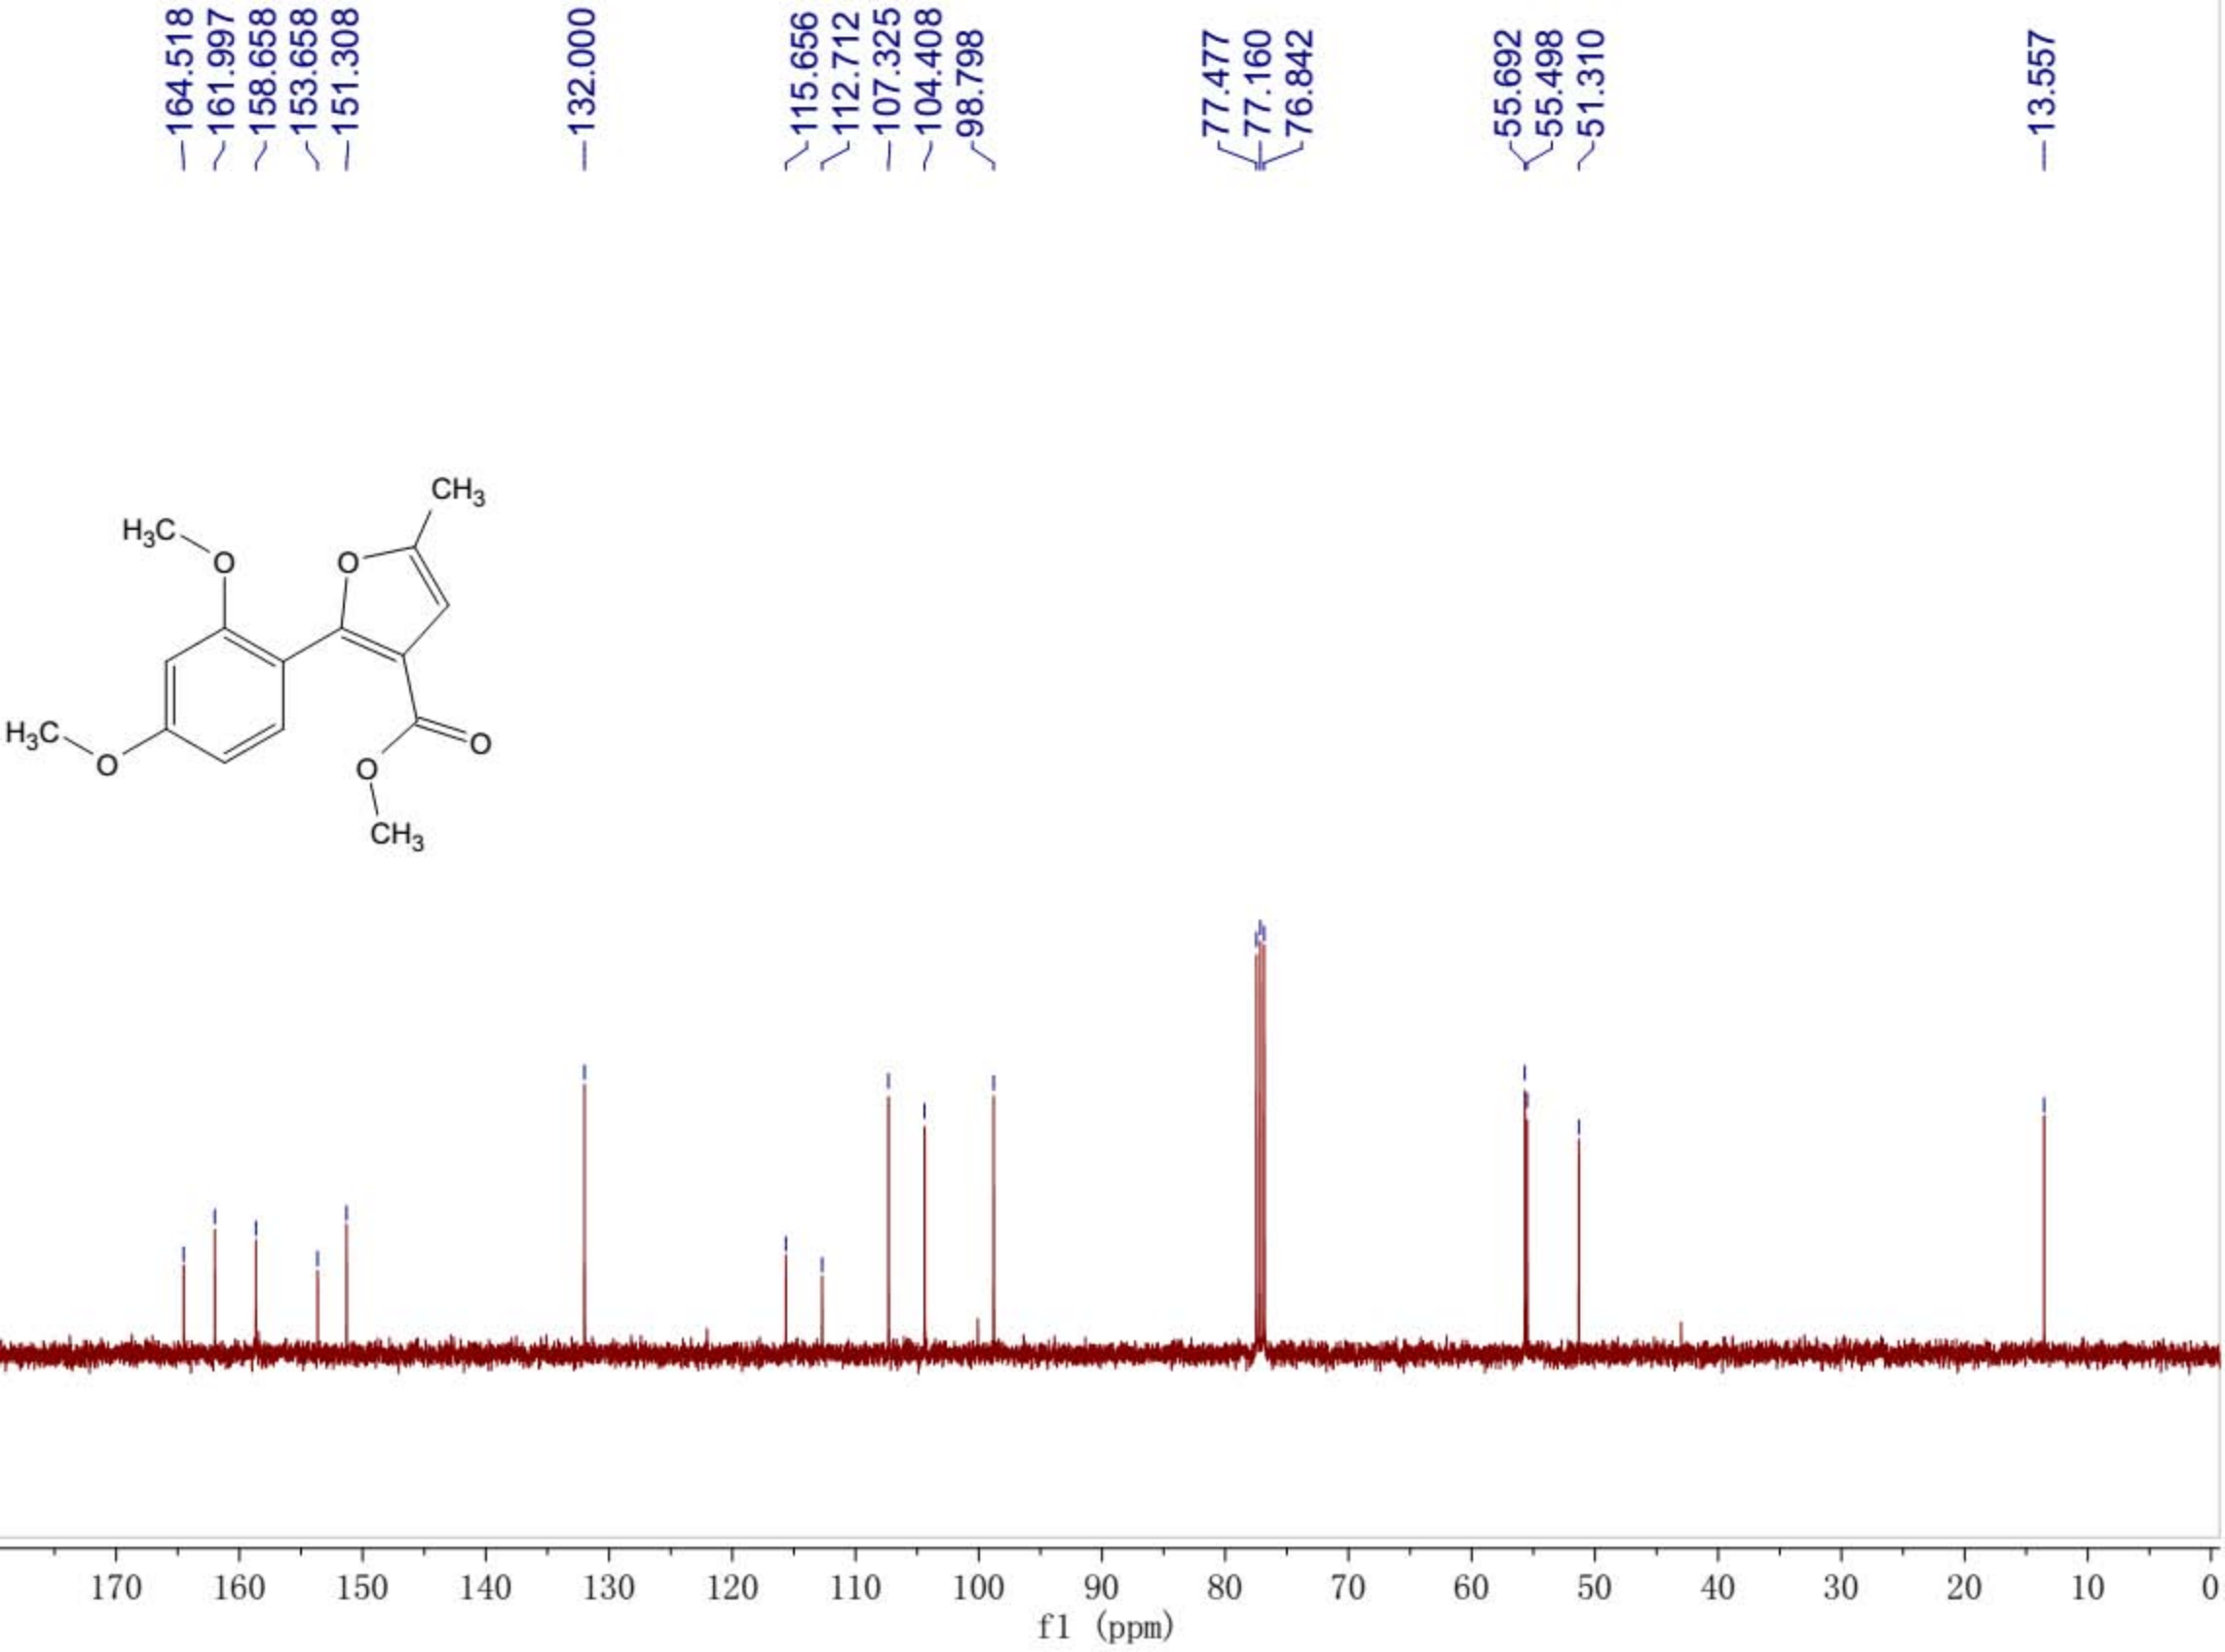

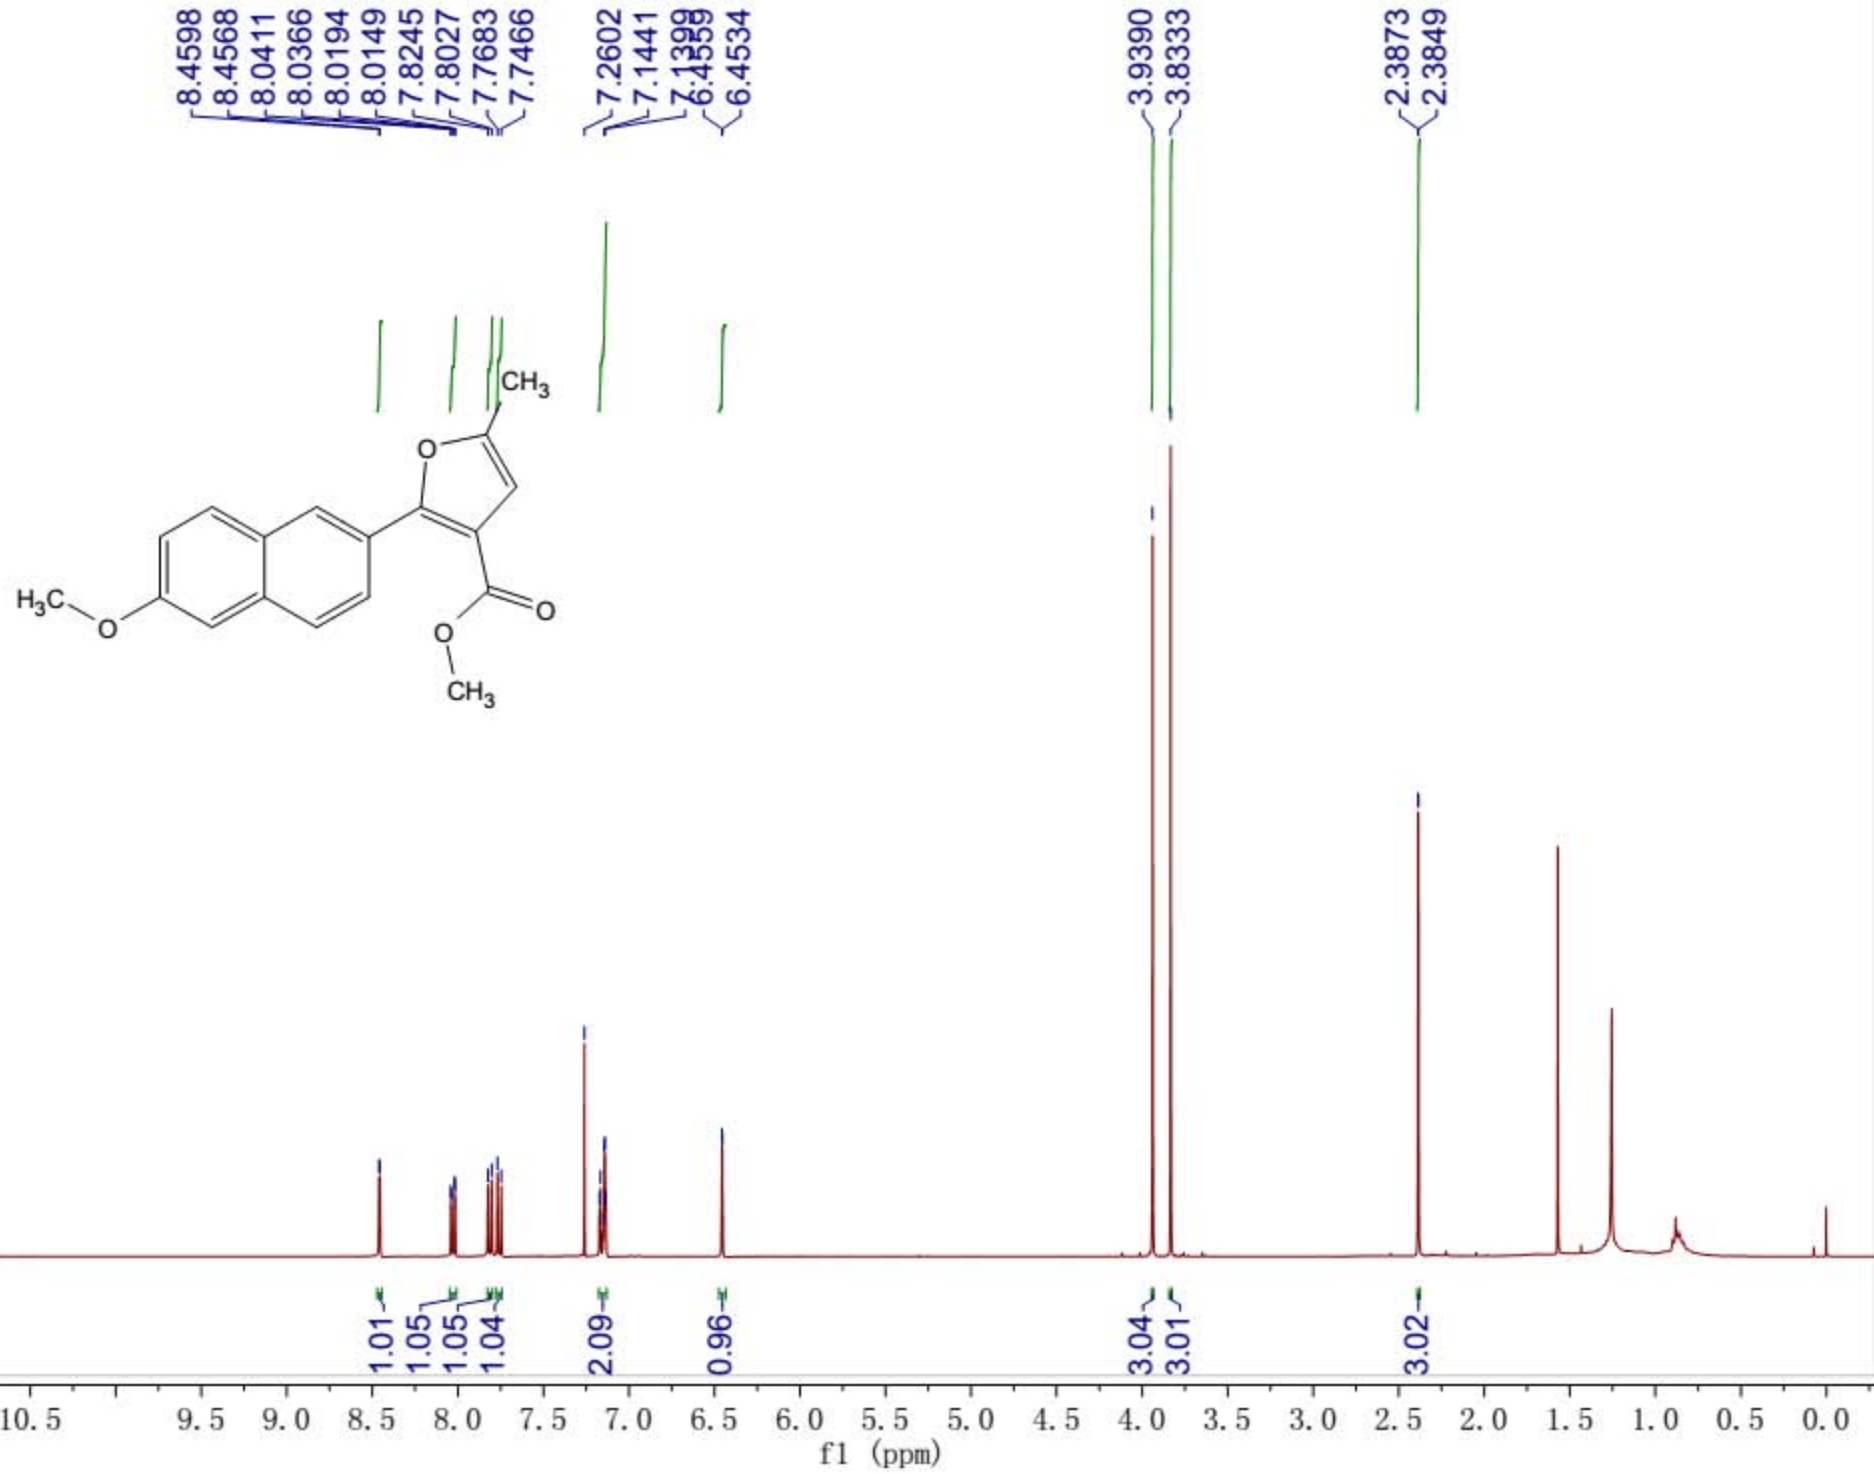

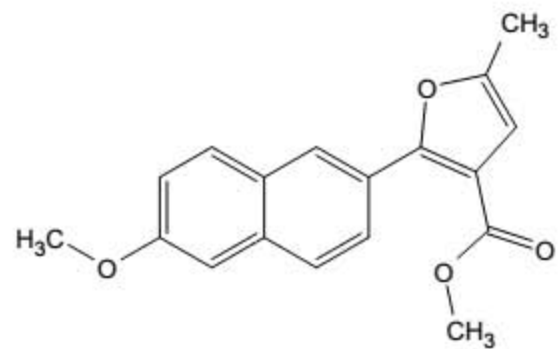

164.5031  
158.5546  
156.5658  
151.1117

134.8372  
130.4470  
128.5440  
127.7501  
126.5011  
126.0567  
119.2454  
113.9649  
108.9389  
105.7463

77.4783  
77.1604  
76.8426

55.4857  
51.6675

29.8523

13.5650

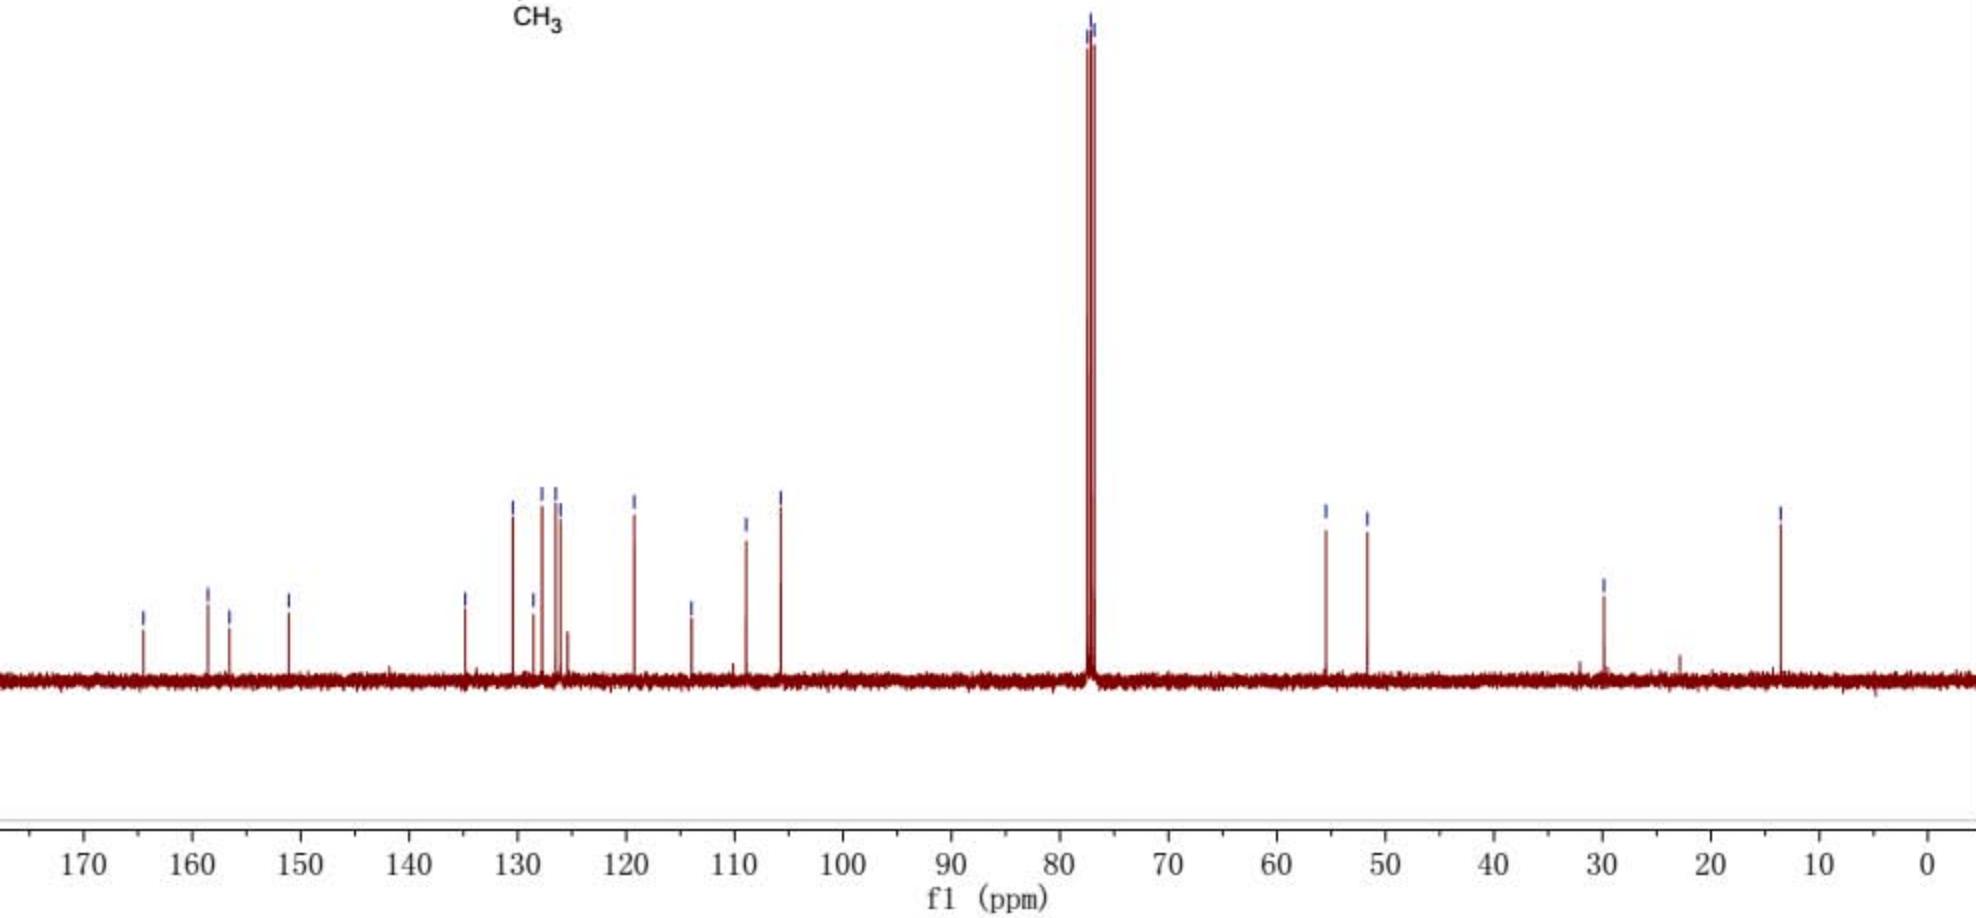



pc-29  
8.120  
8.115  
8.111  
7.821  
7.817  
7.800  
7.796  
7.300  
7.280  
7.161  
7.159  
6.923  
6.314  
6.311

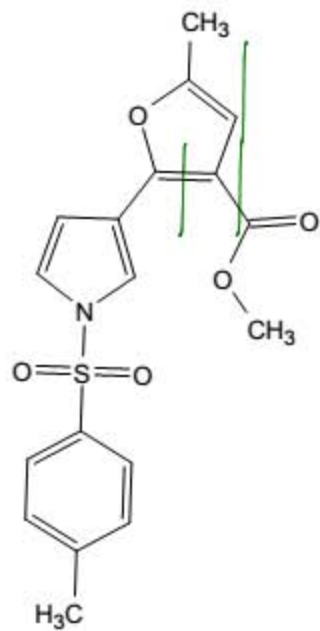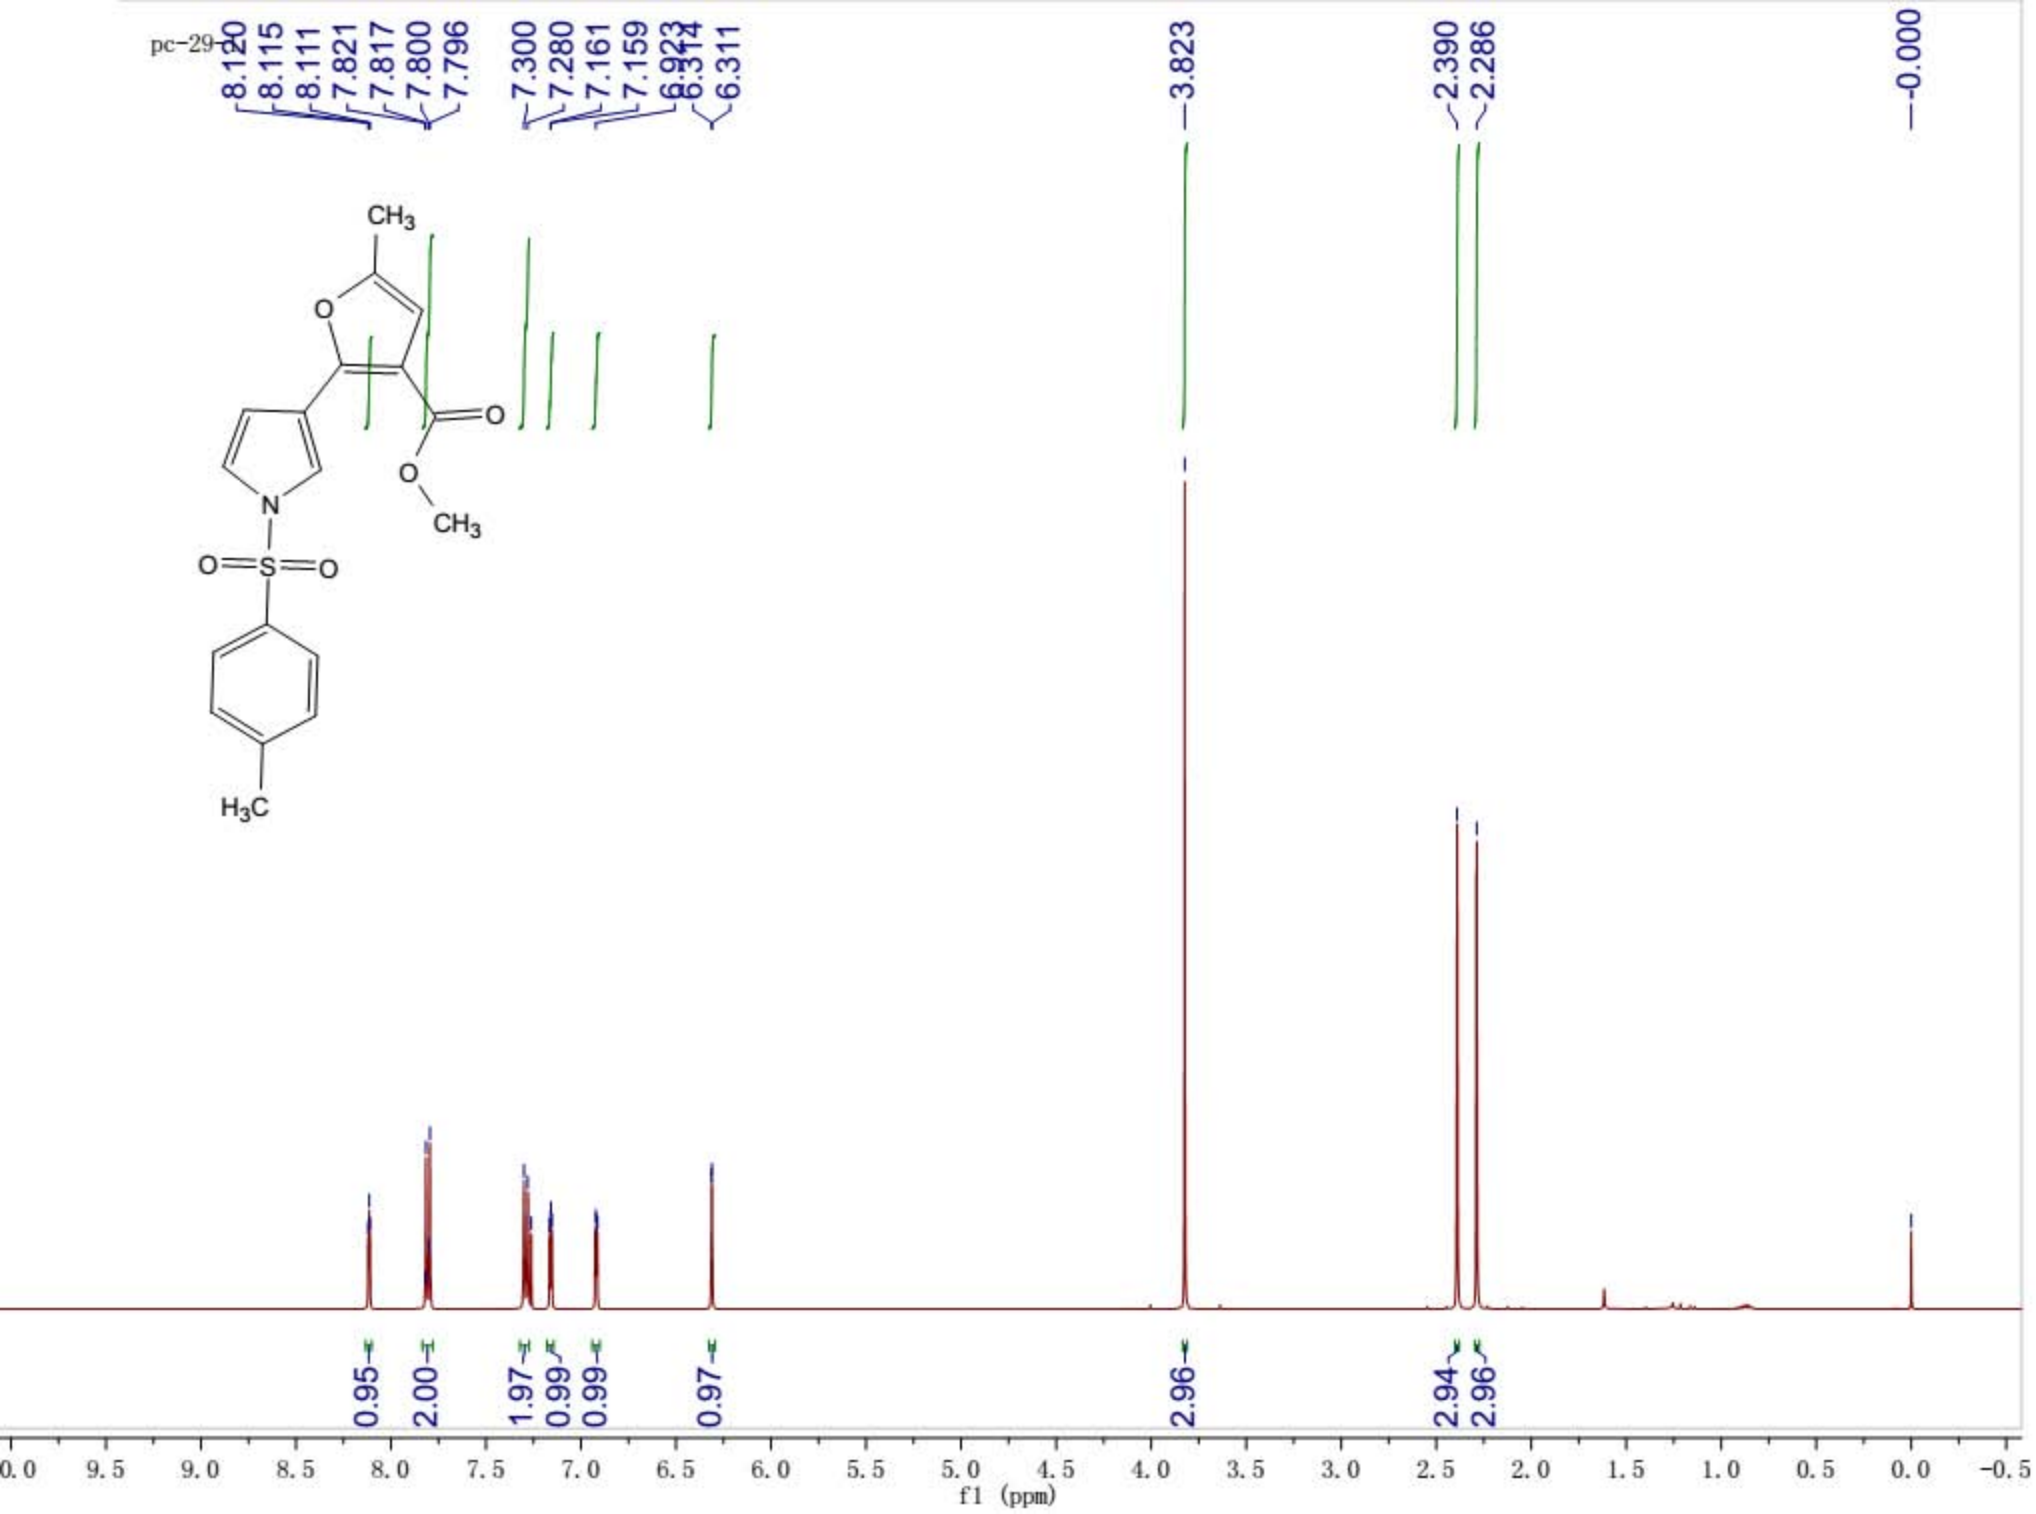

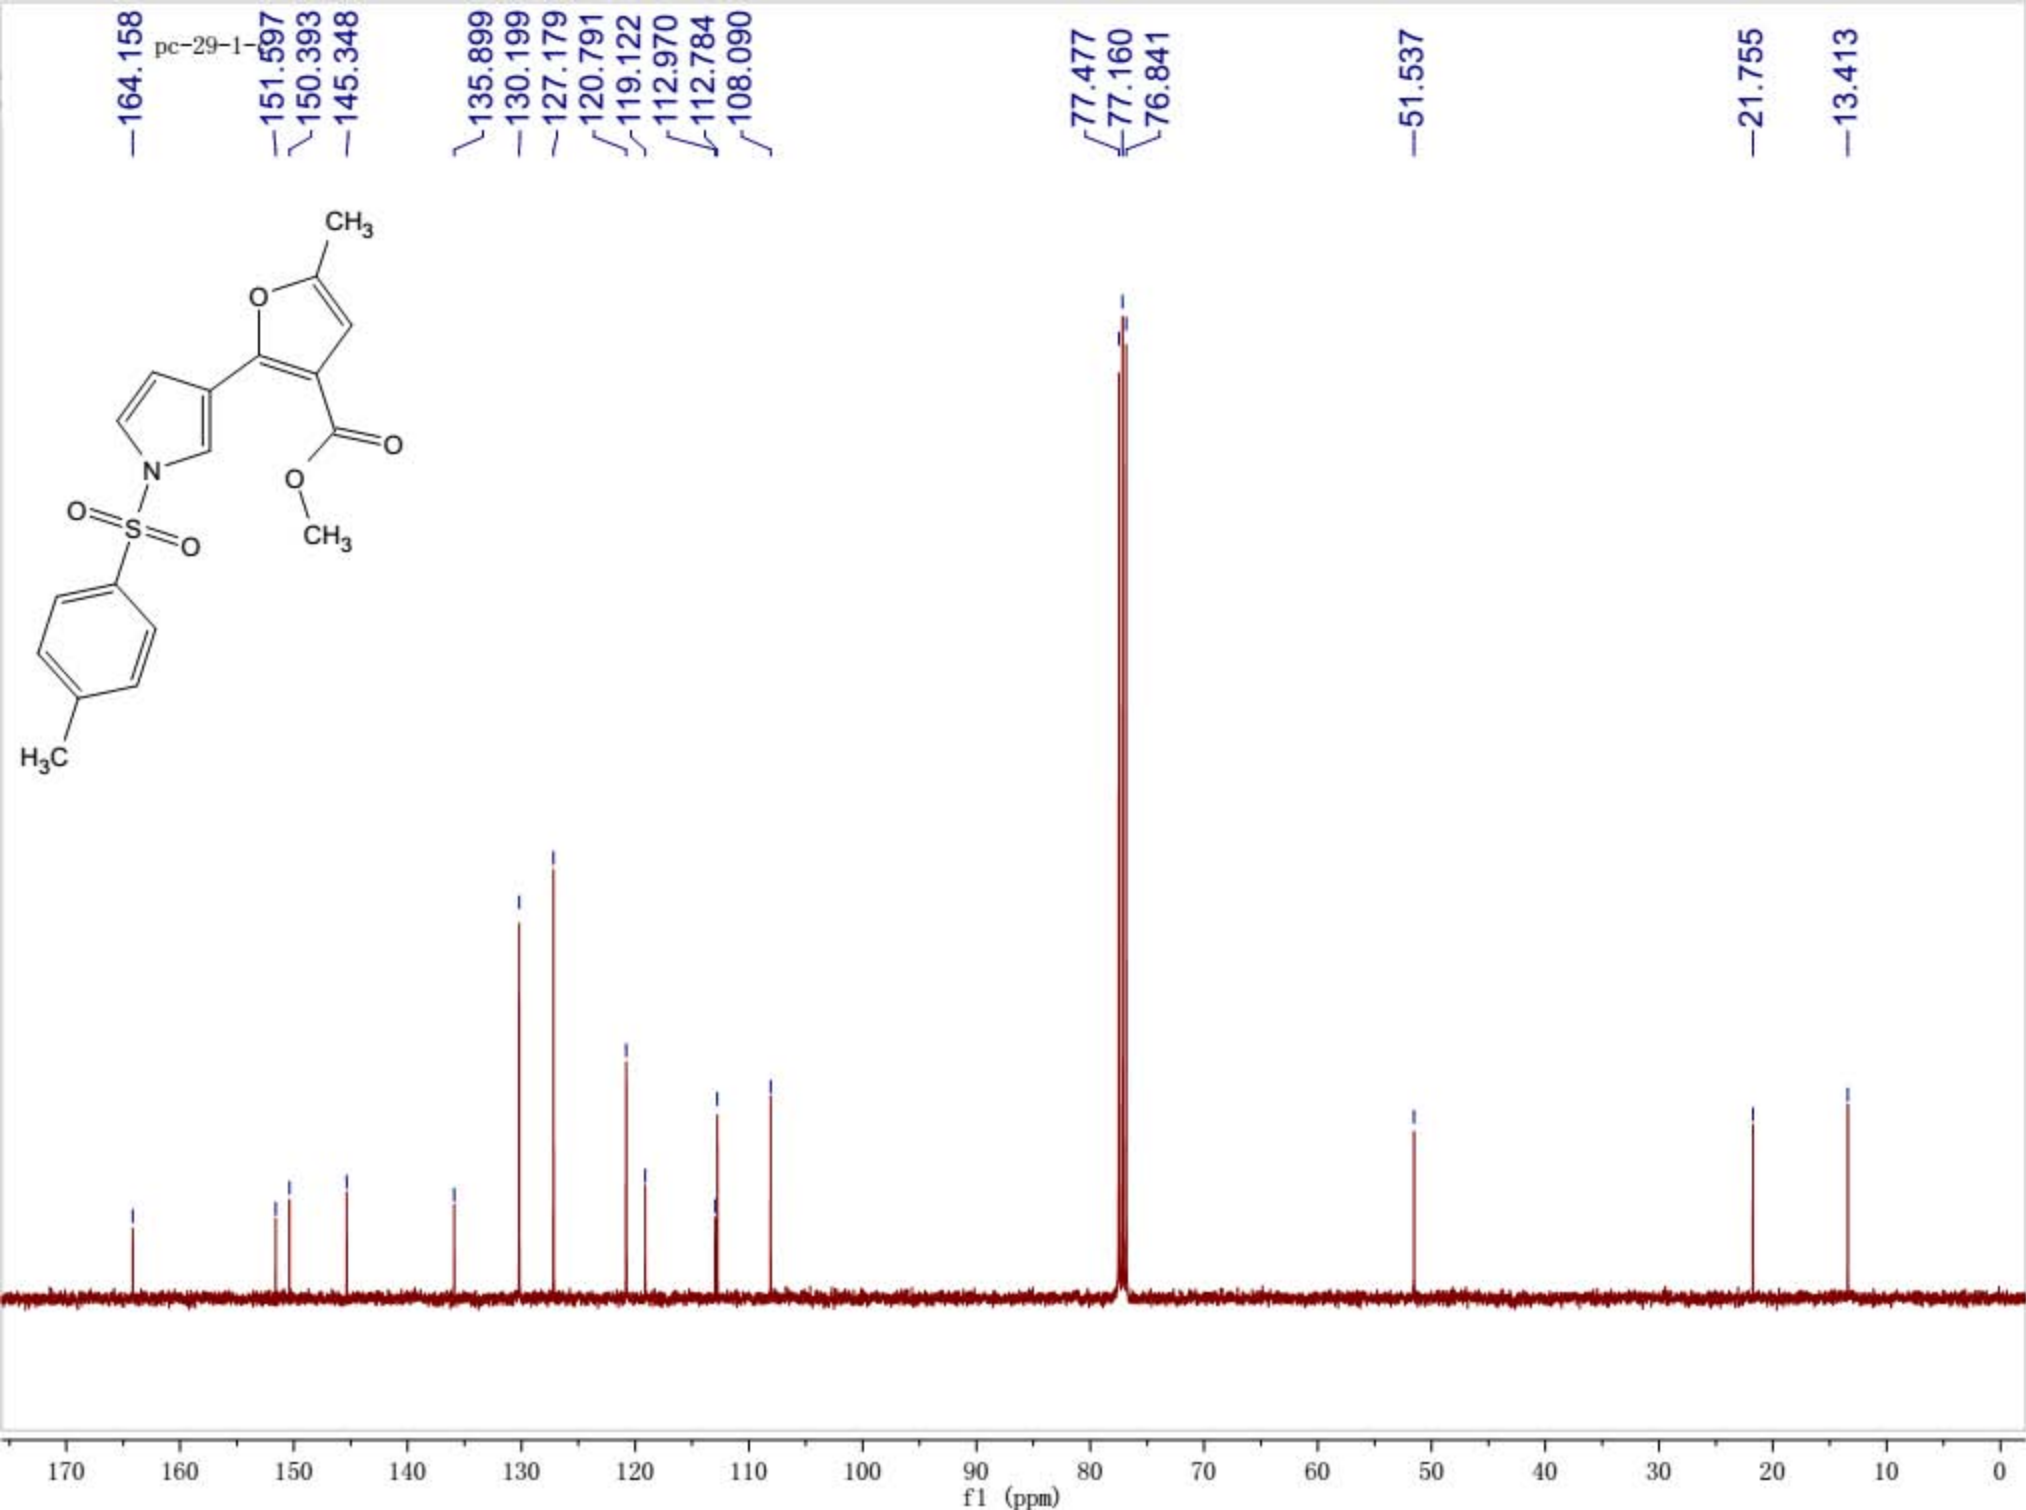

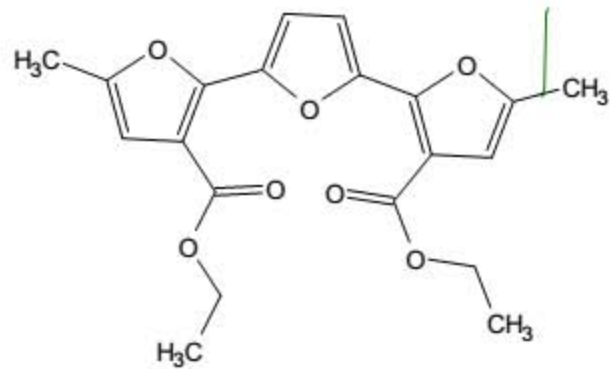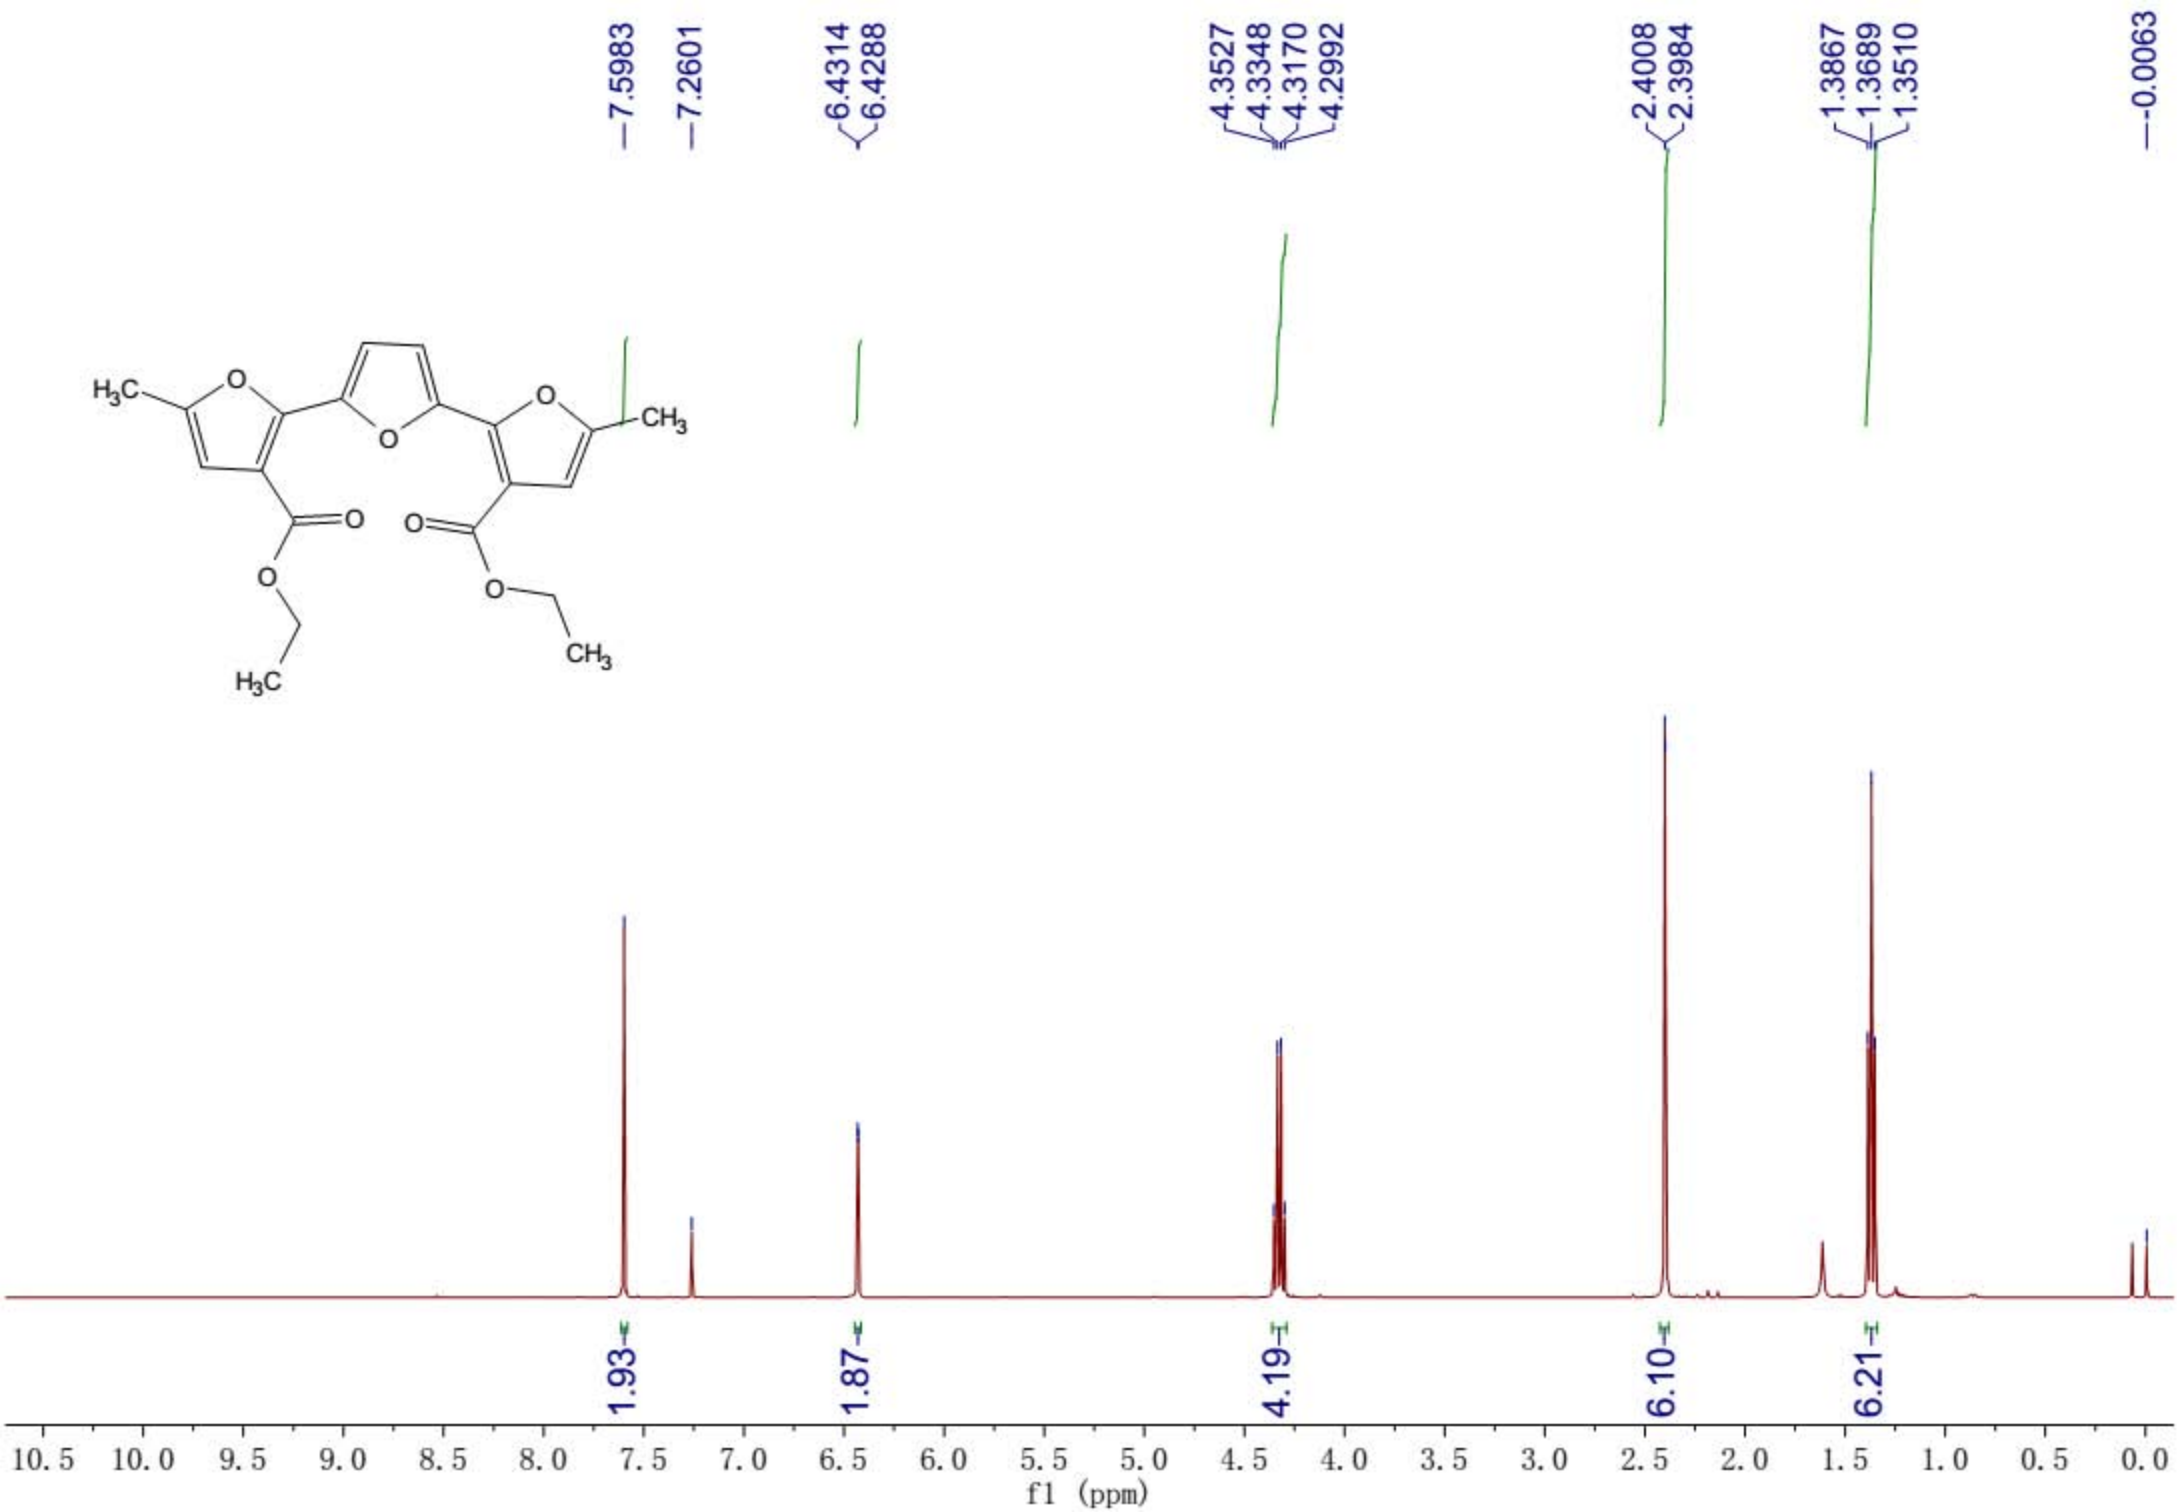

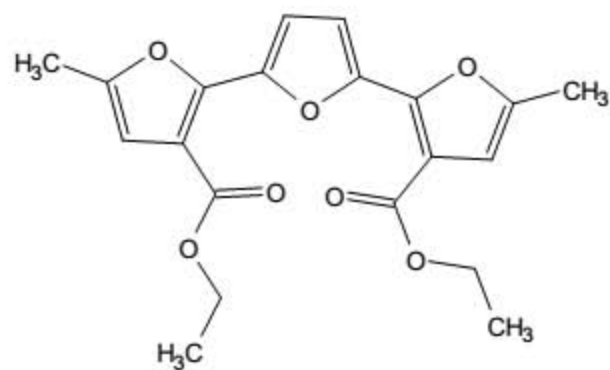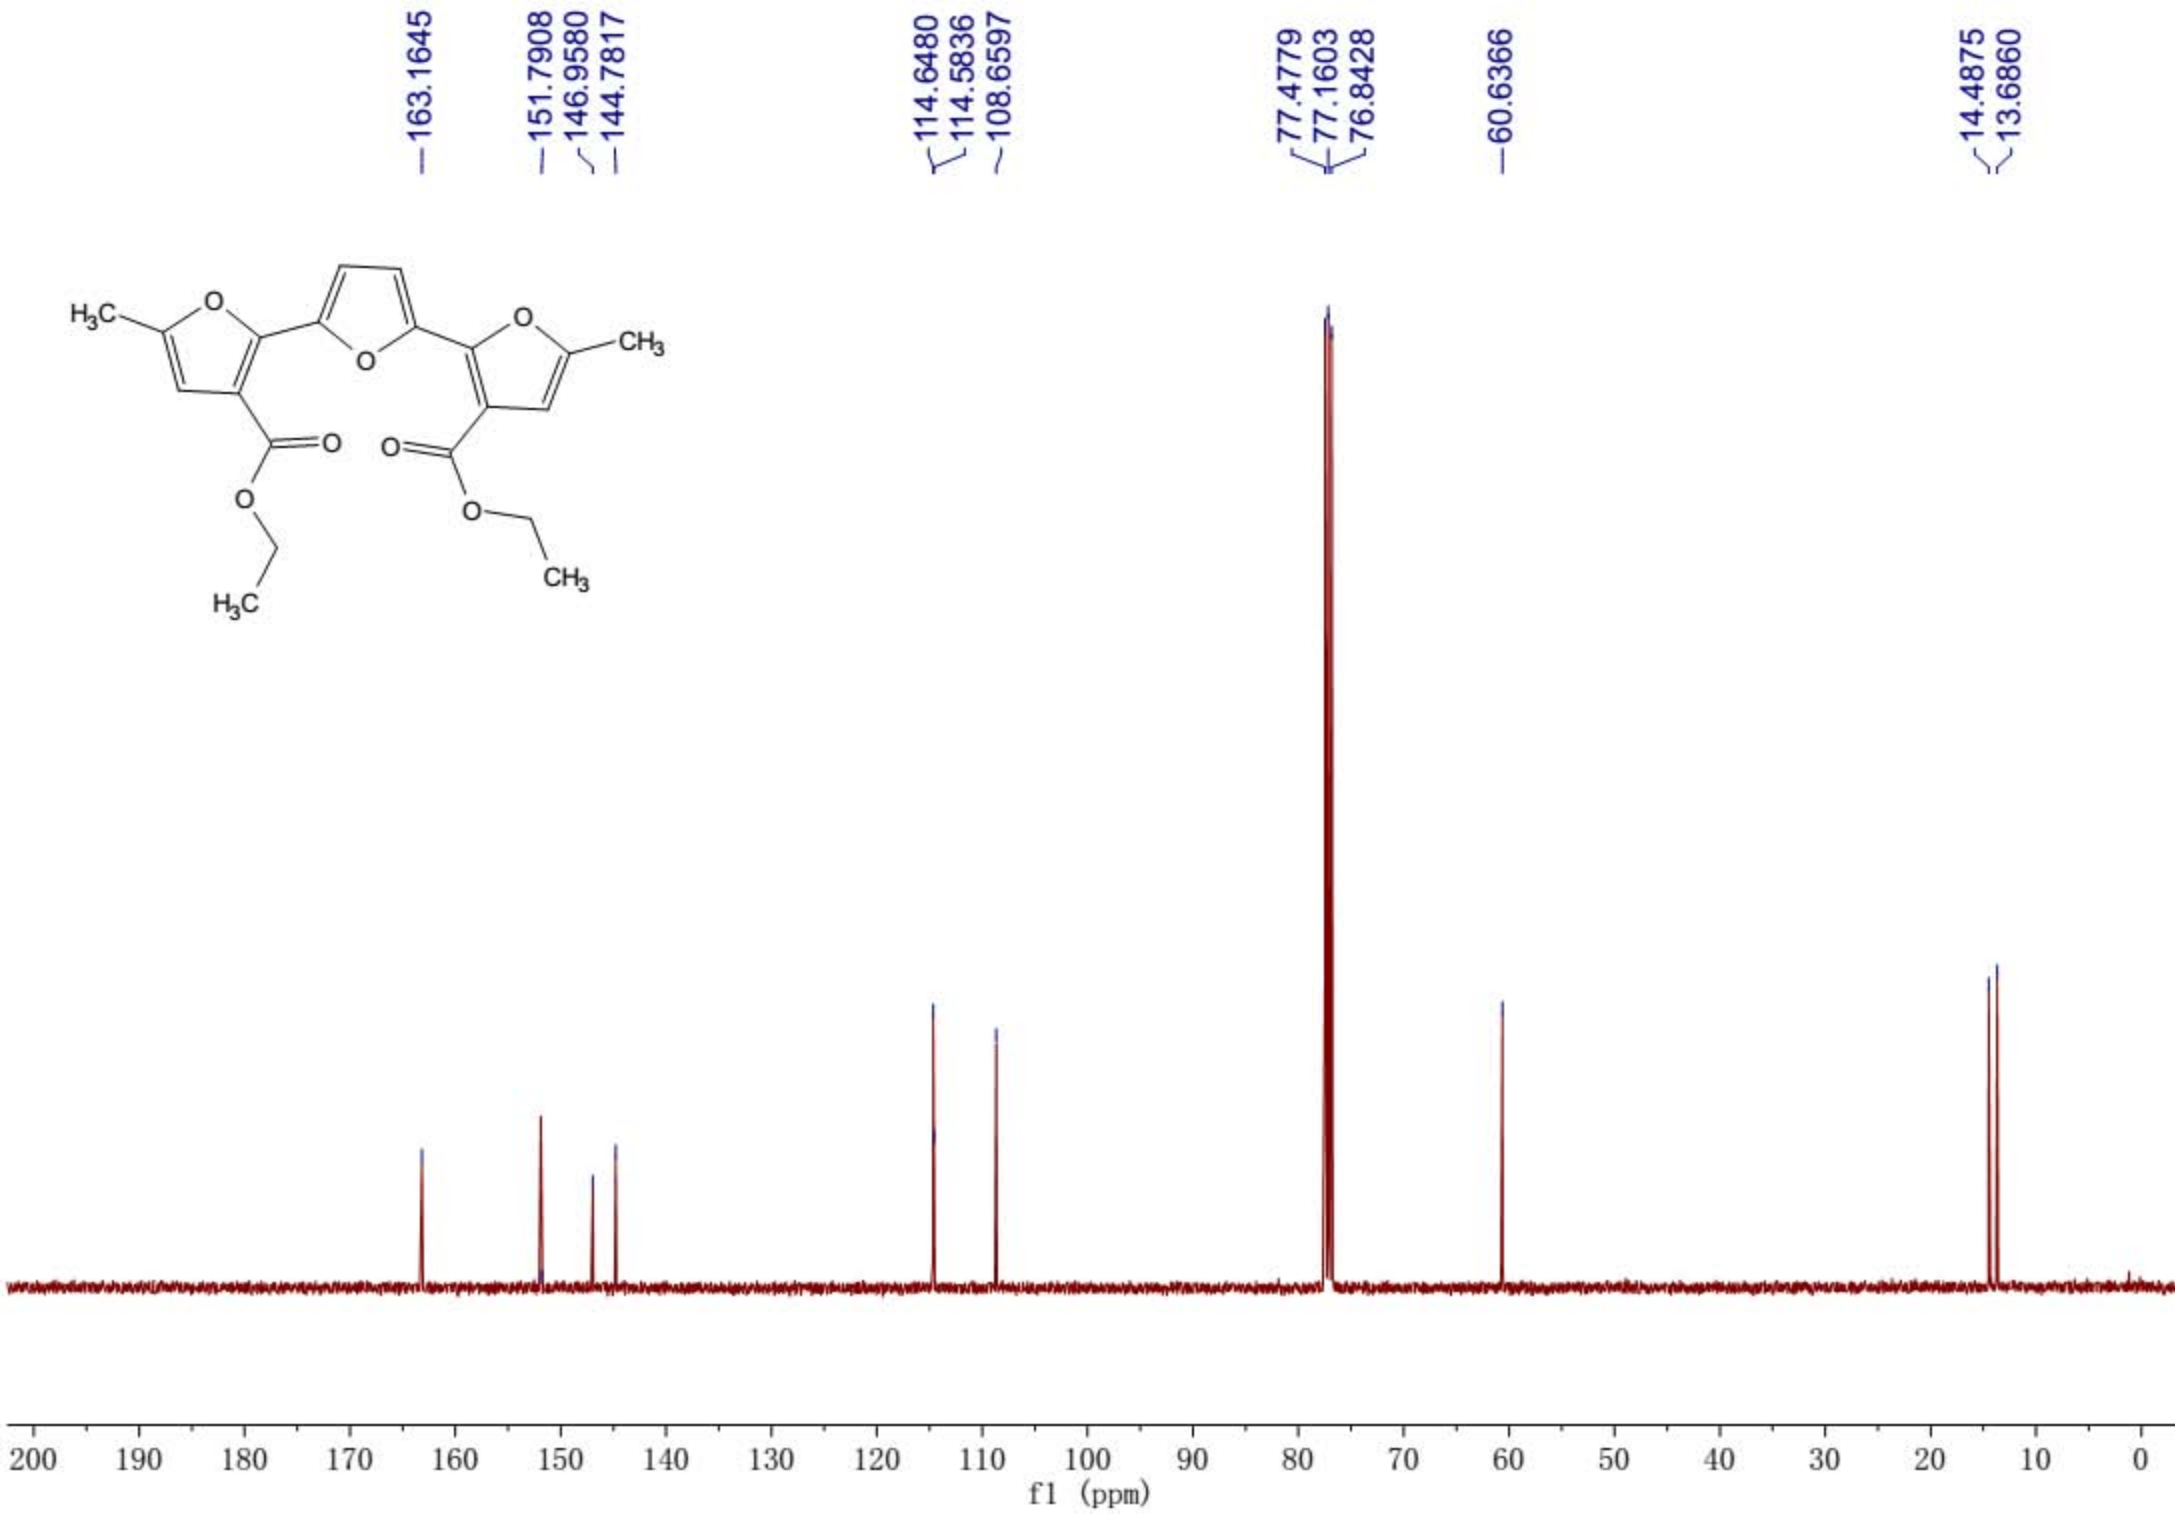

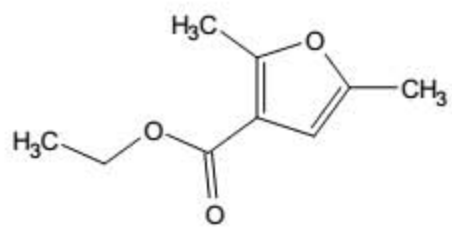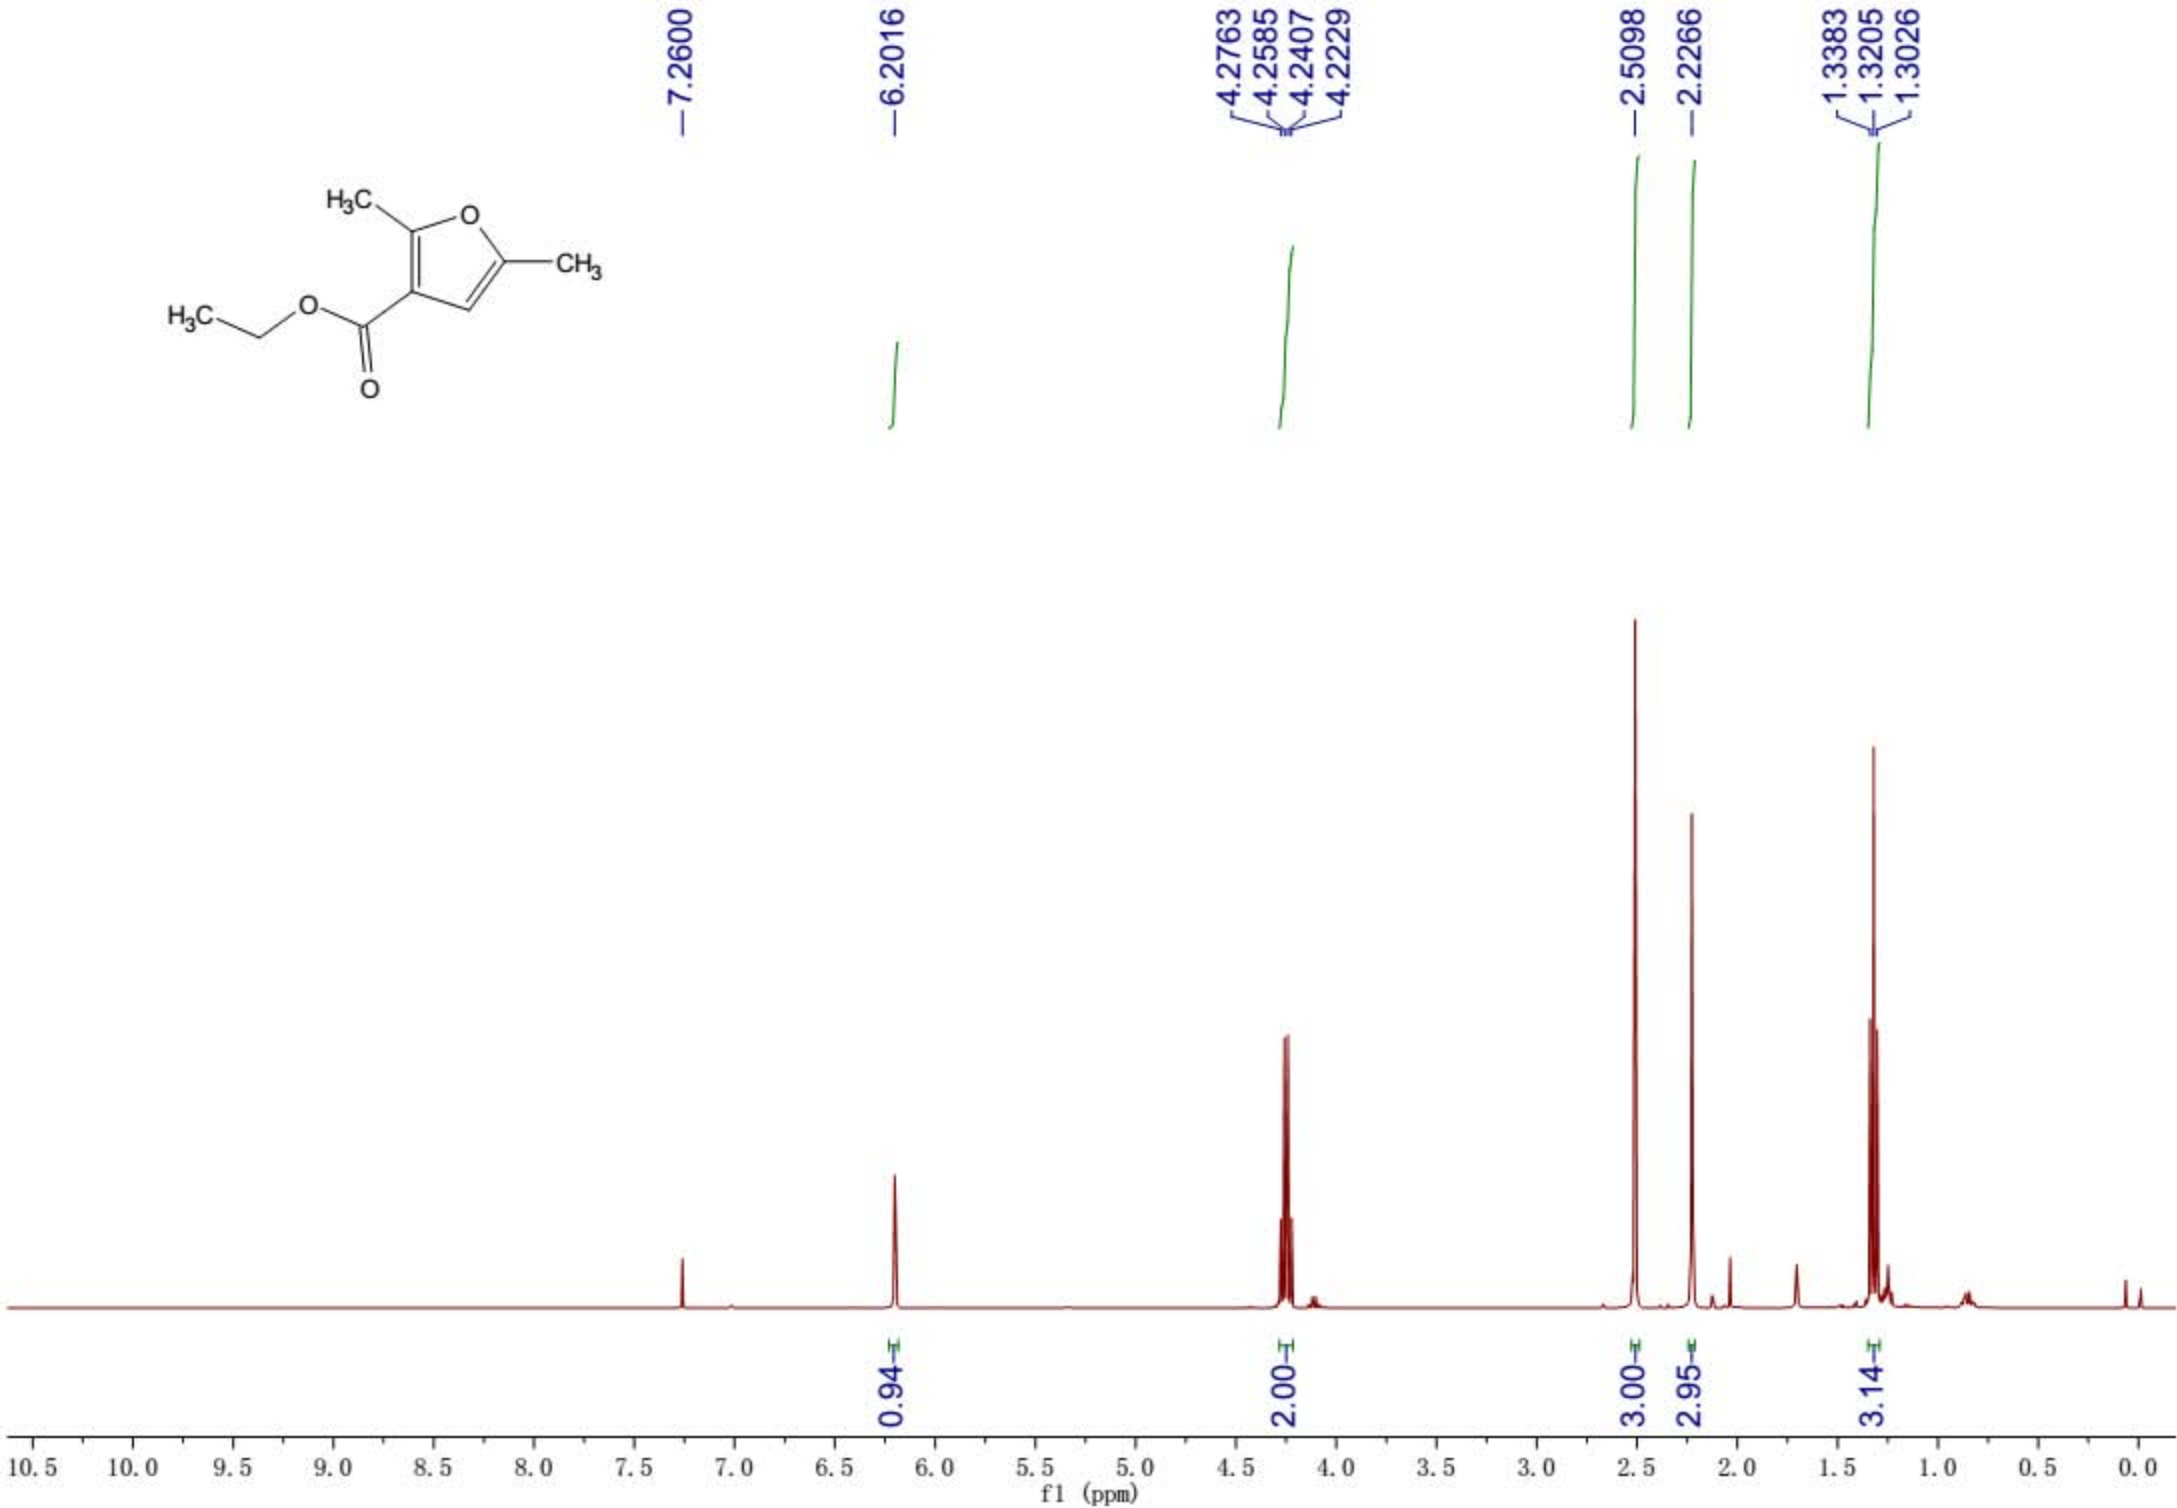

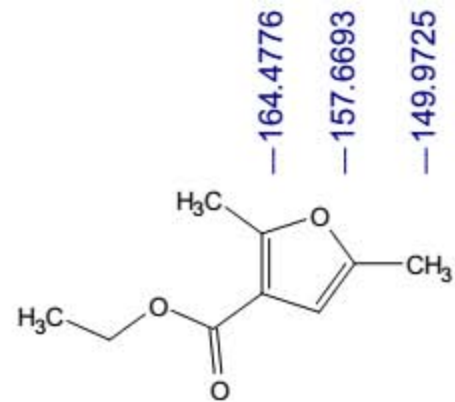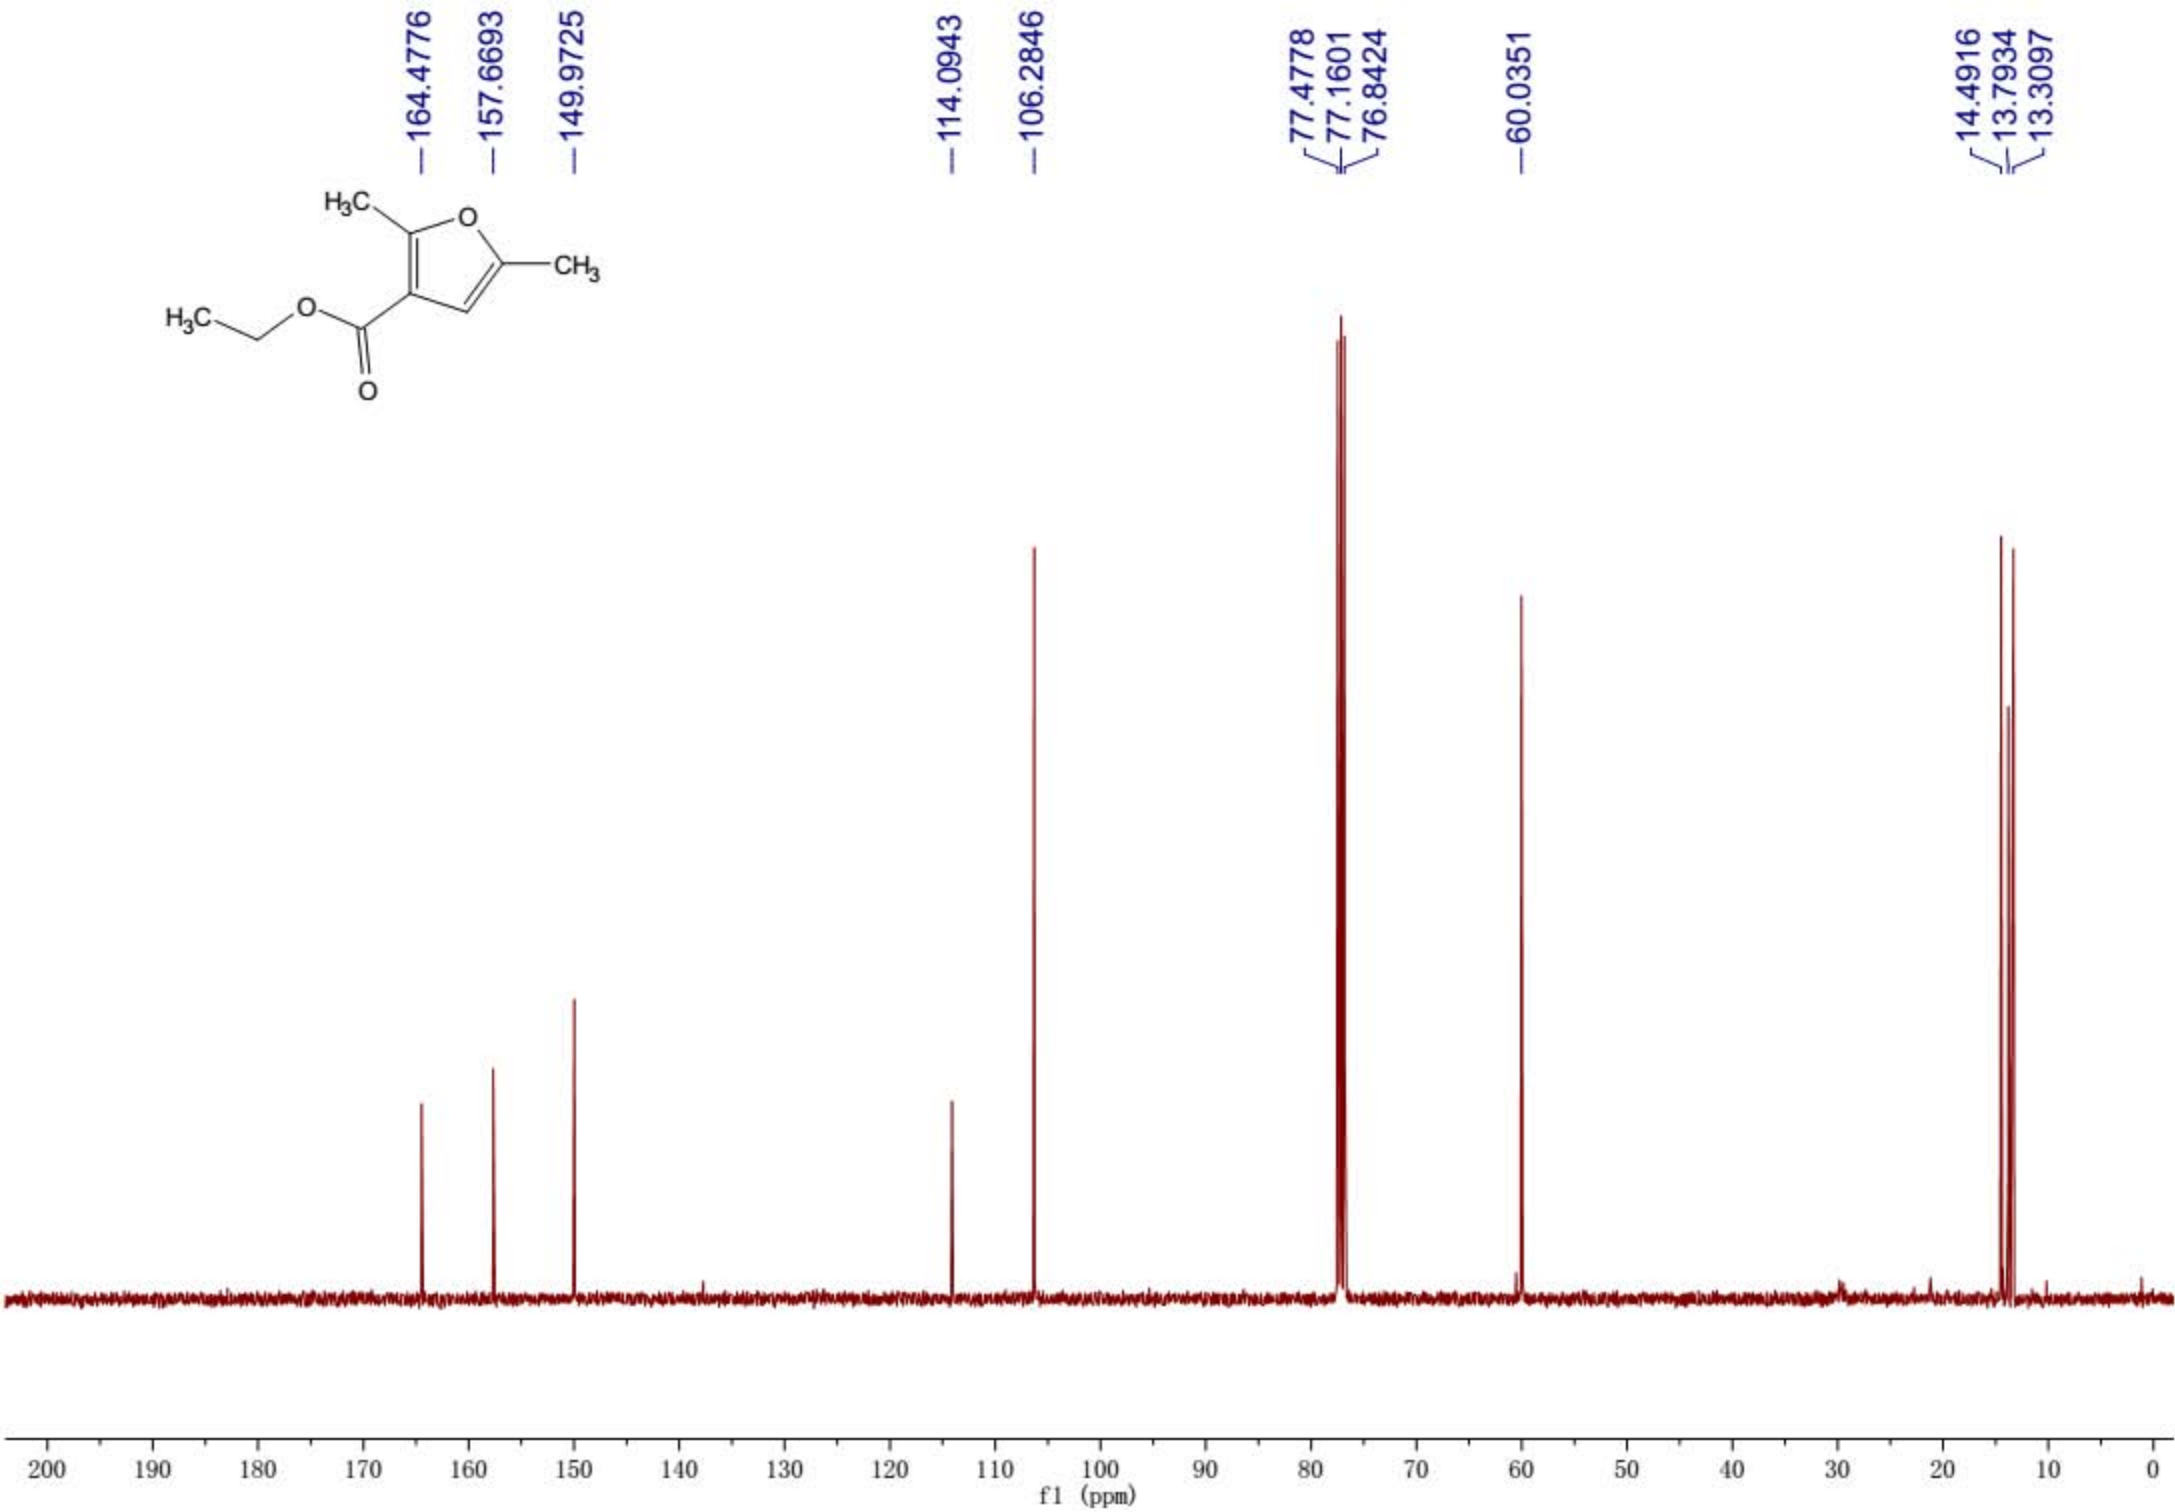

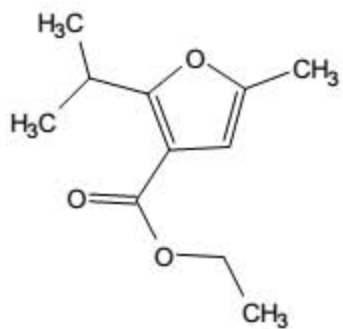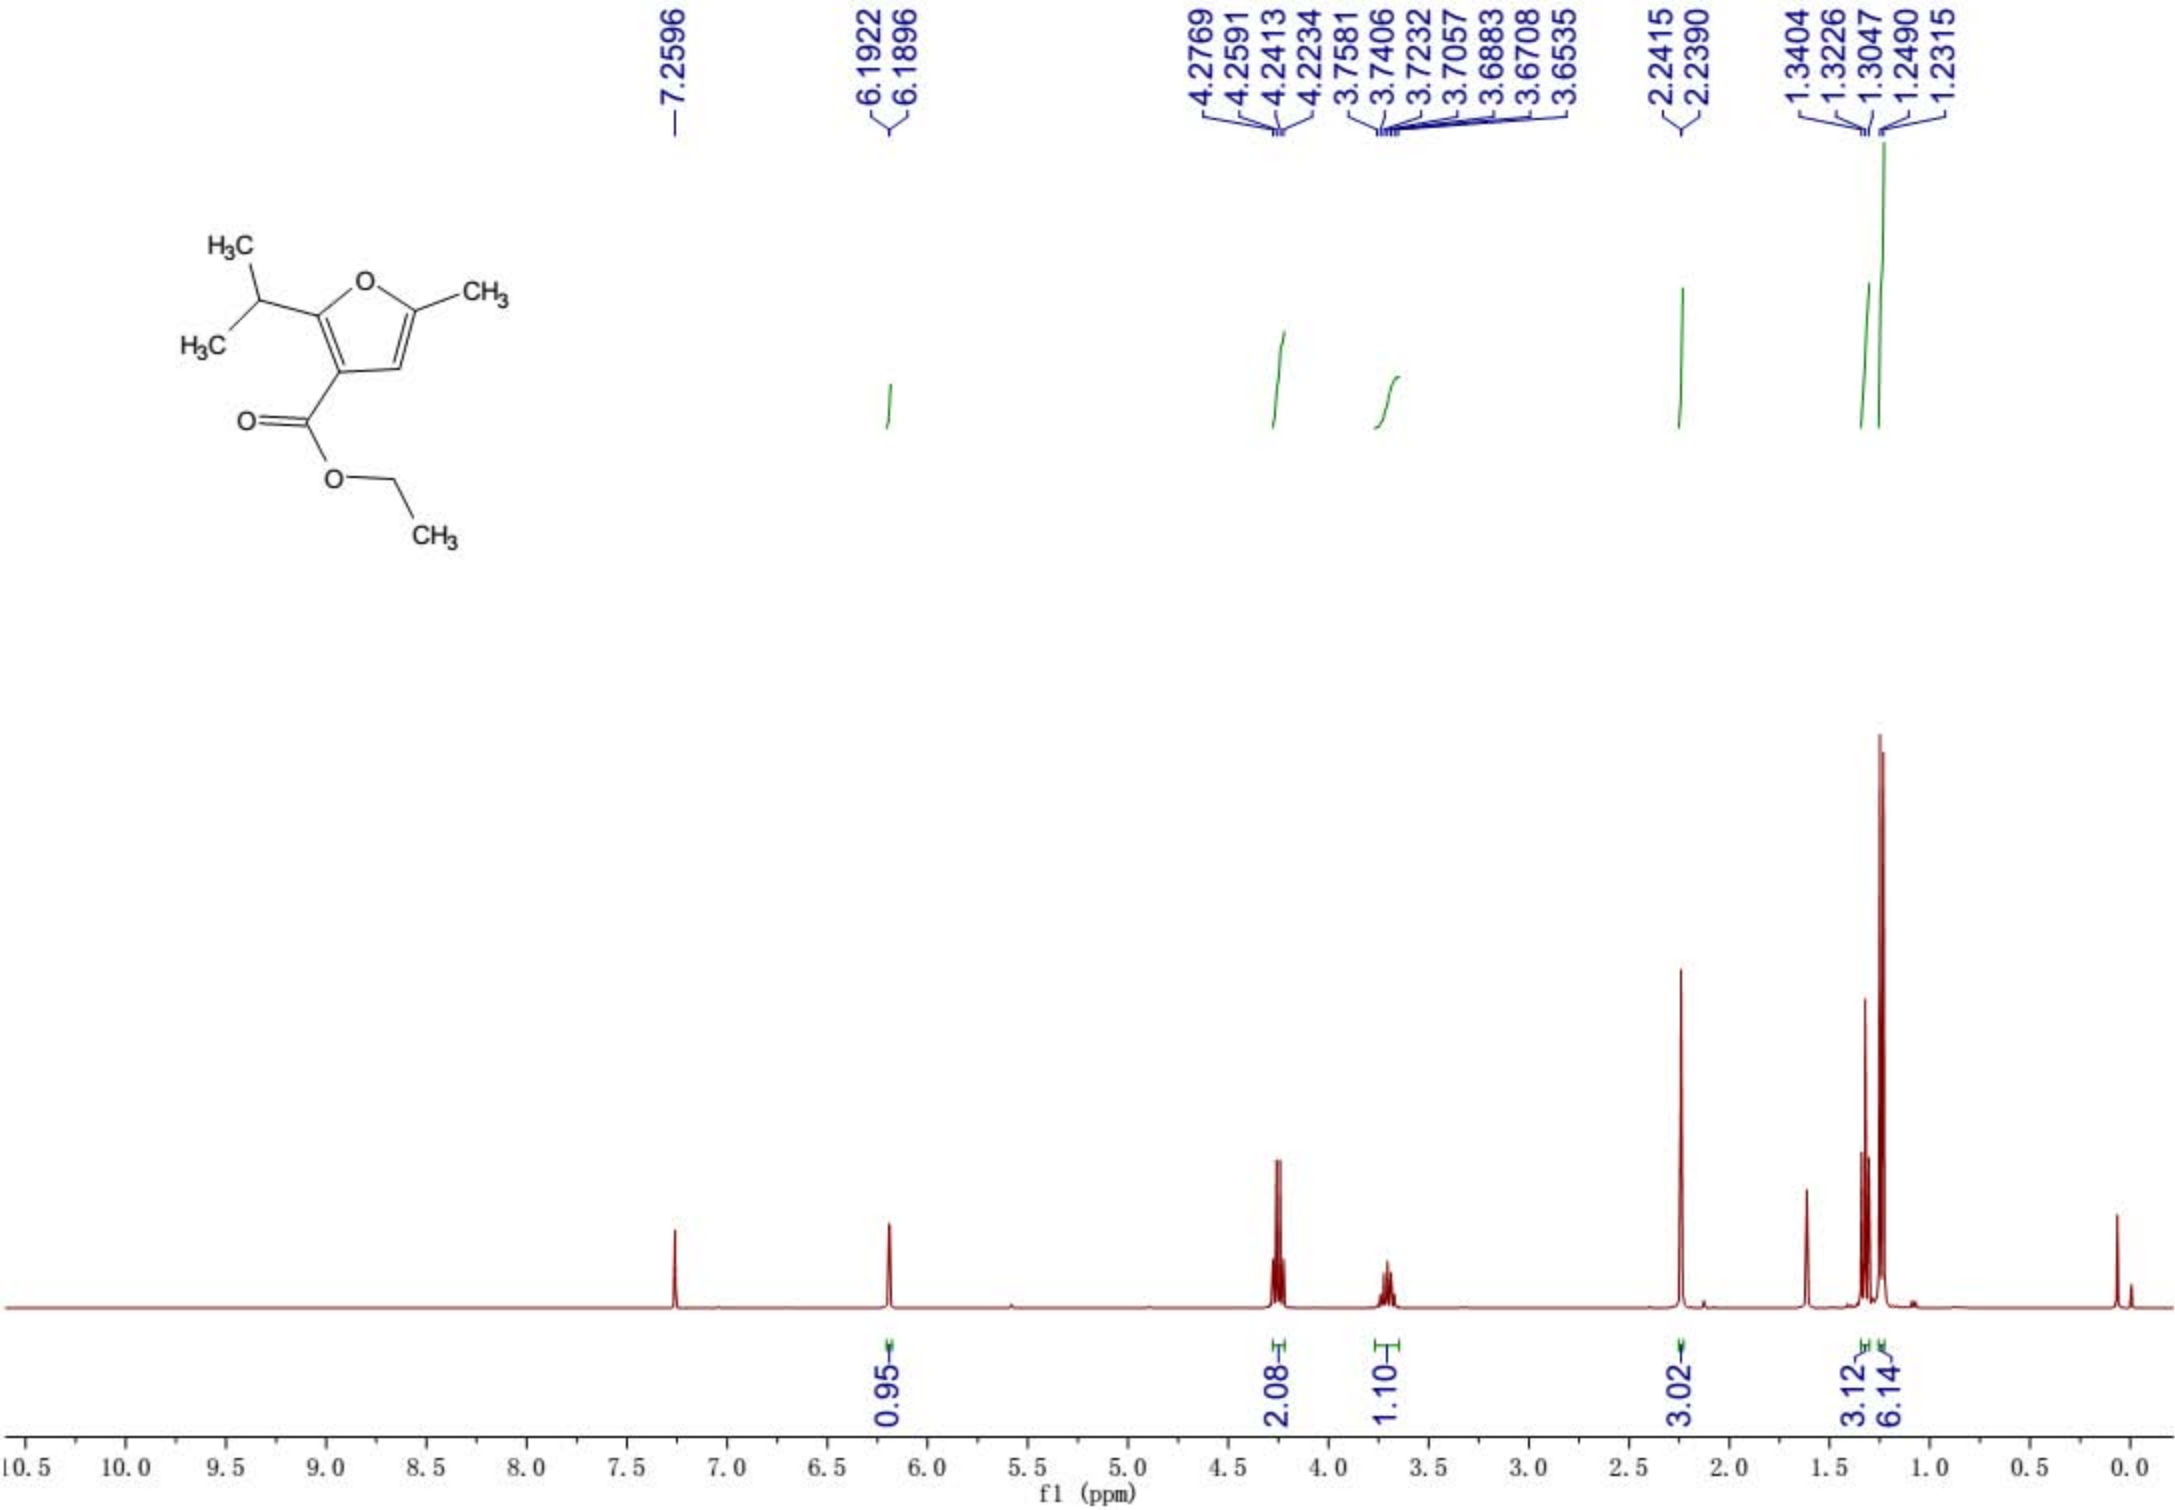

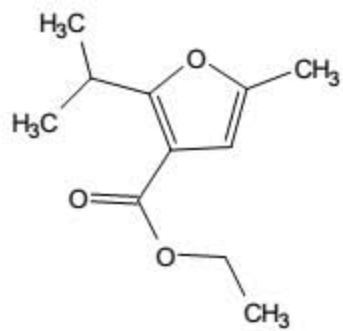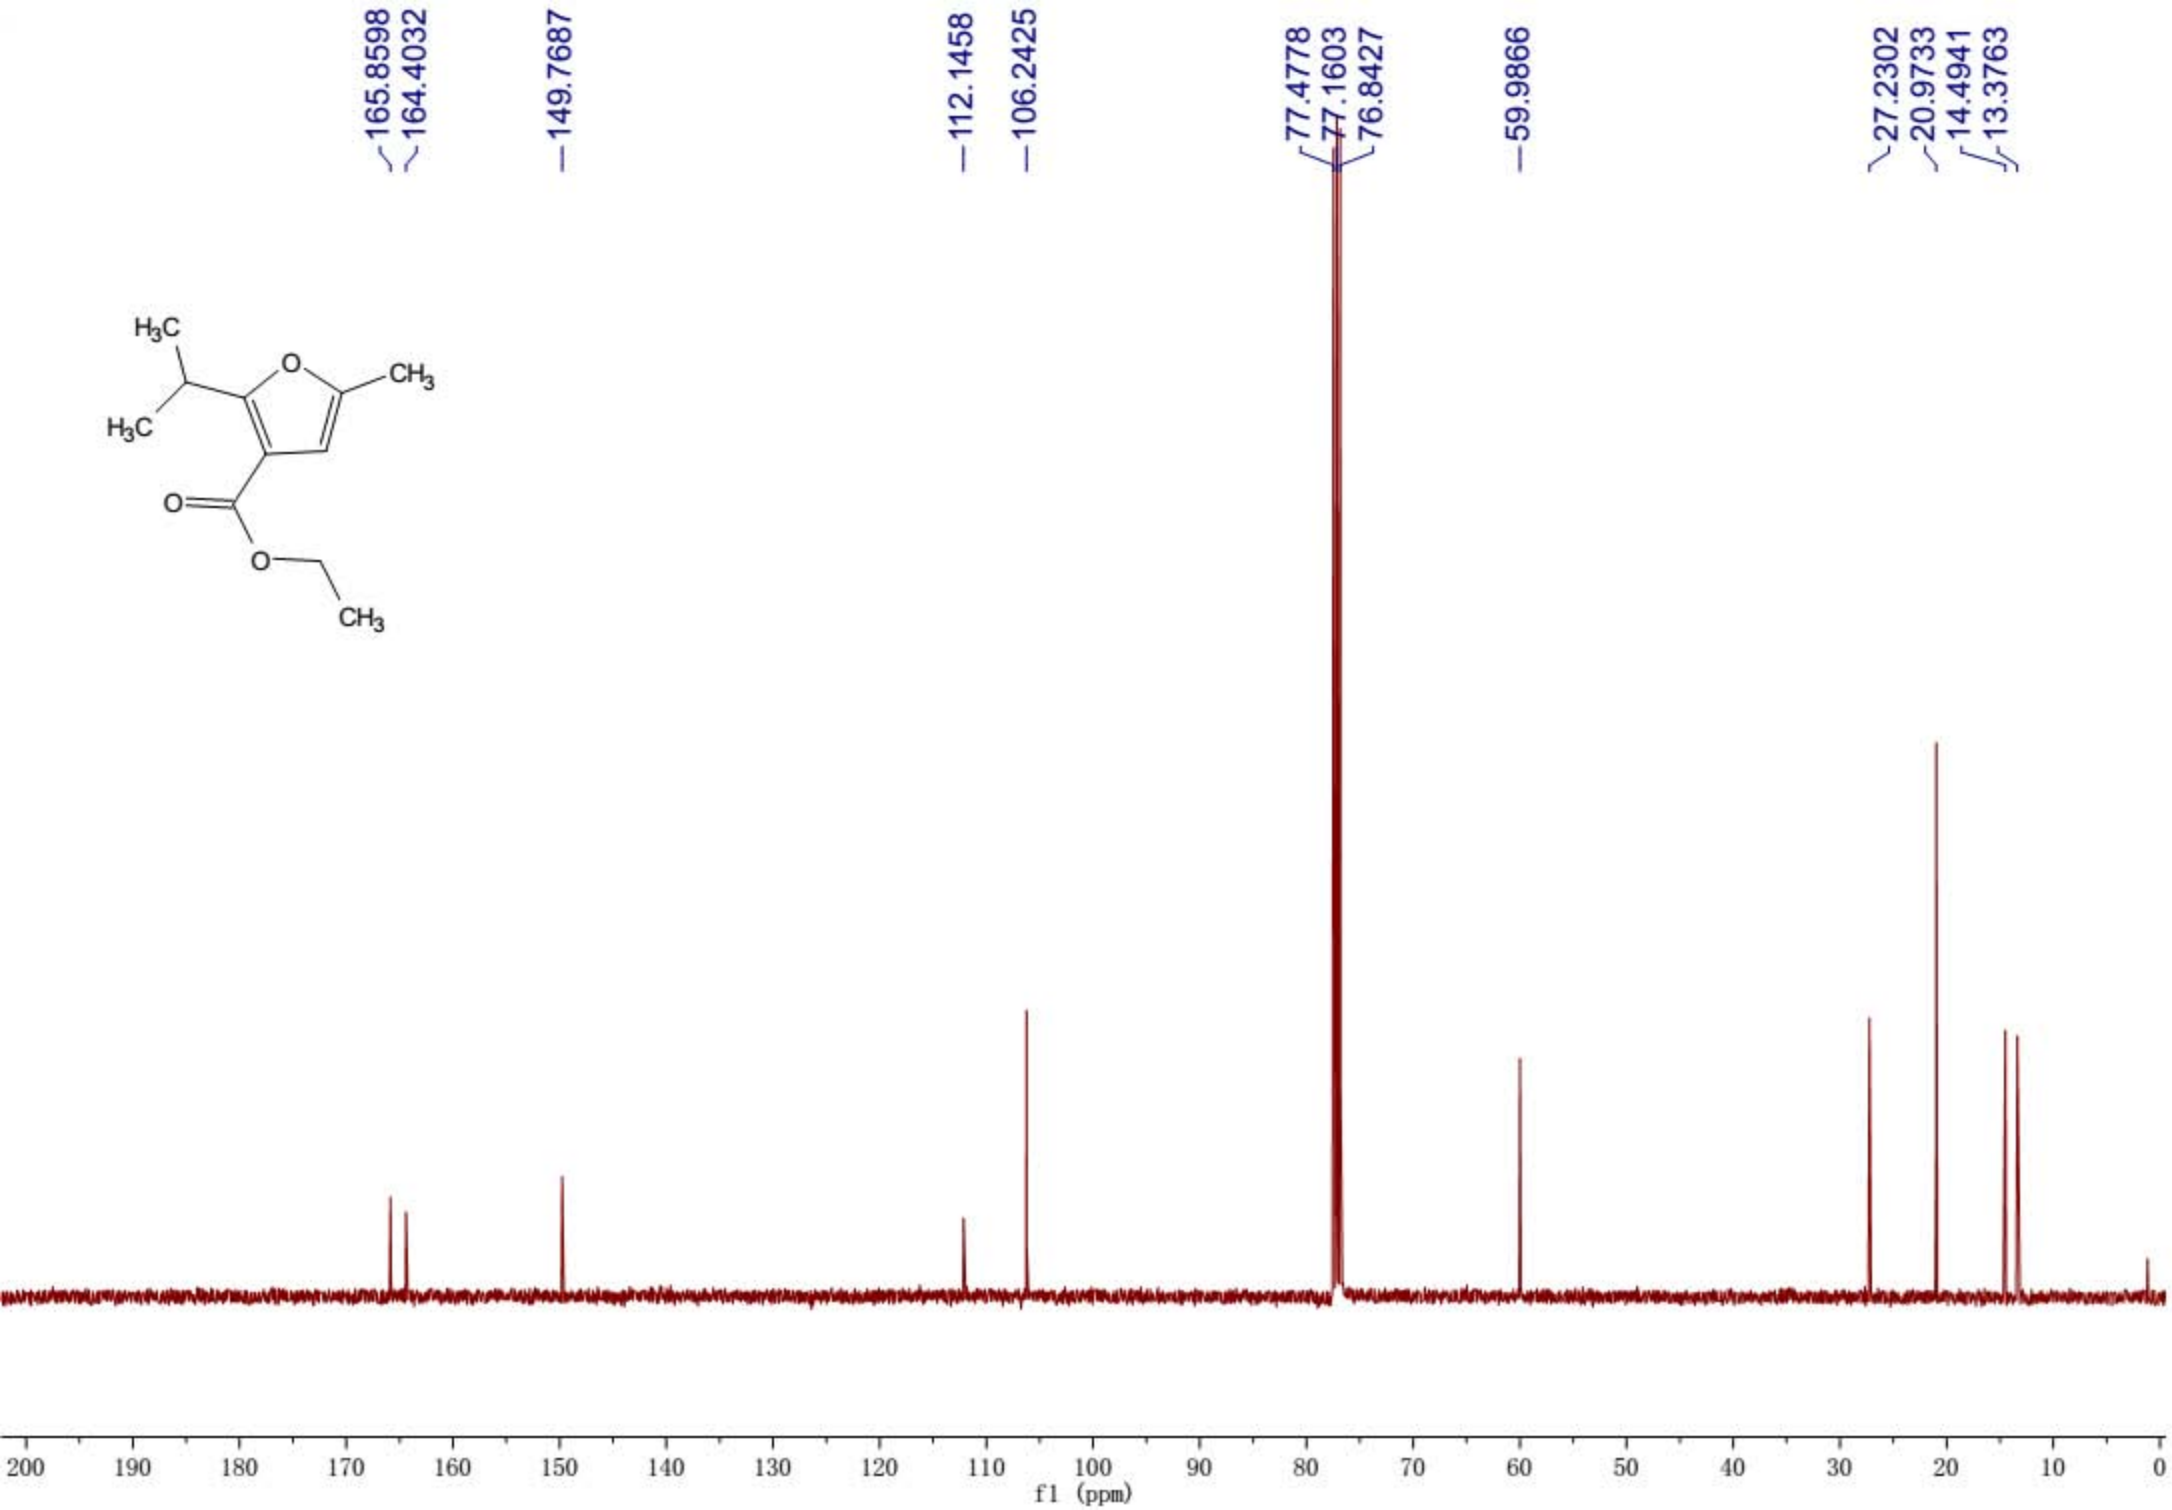



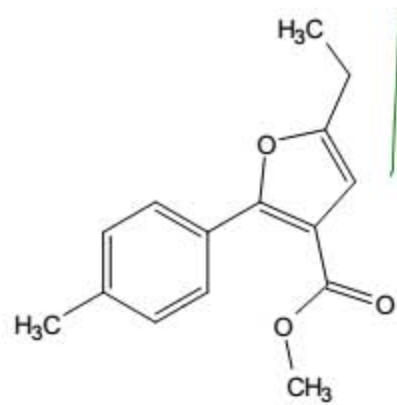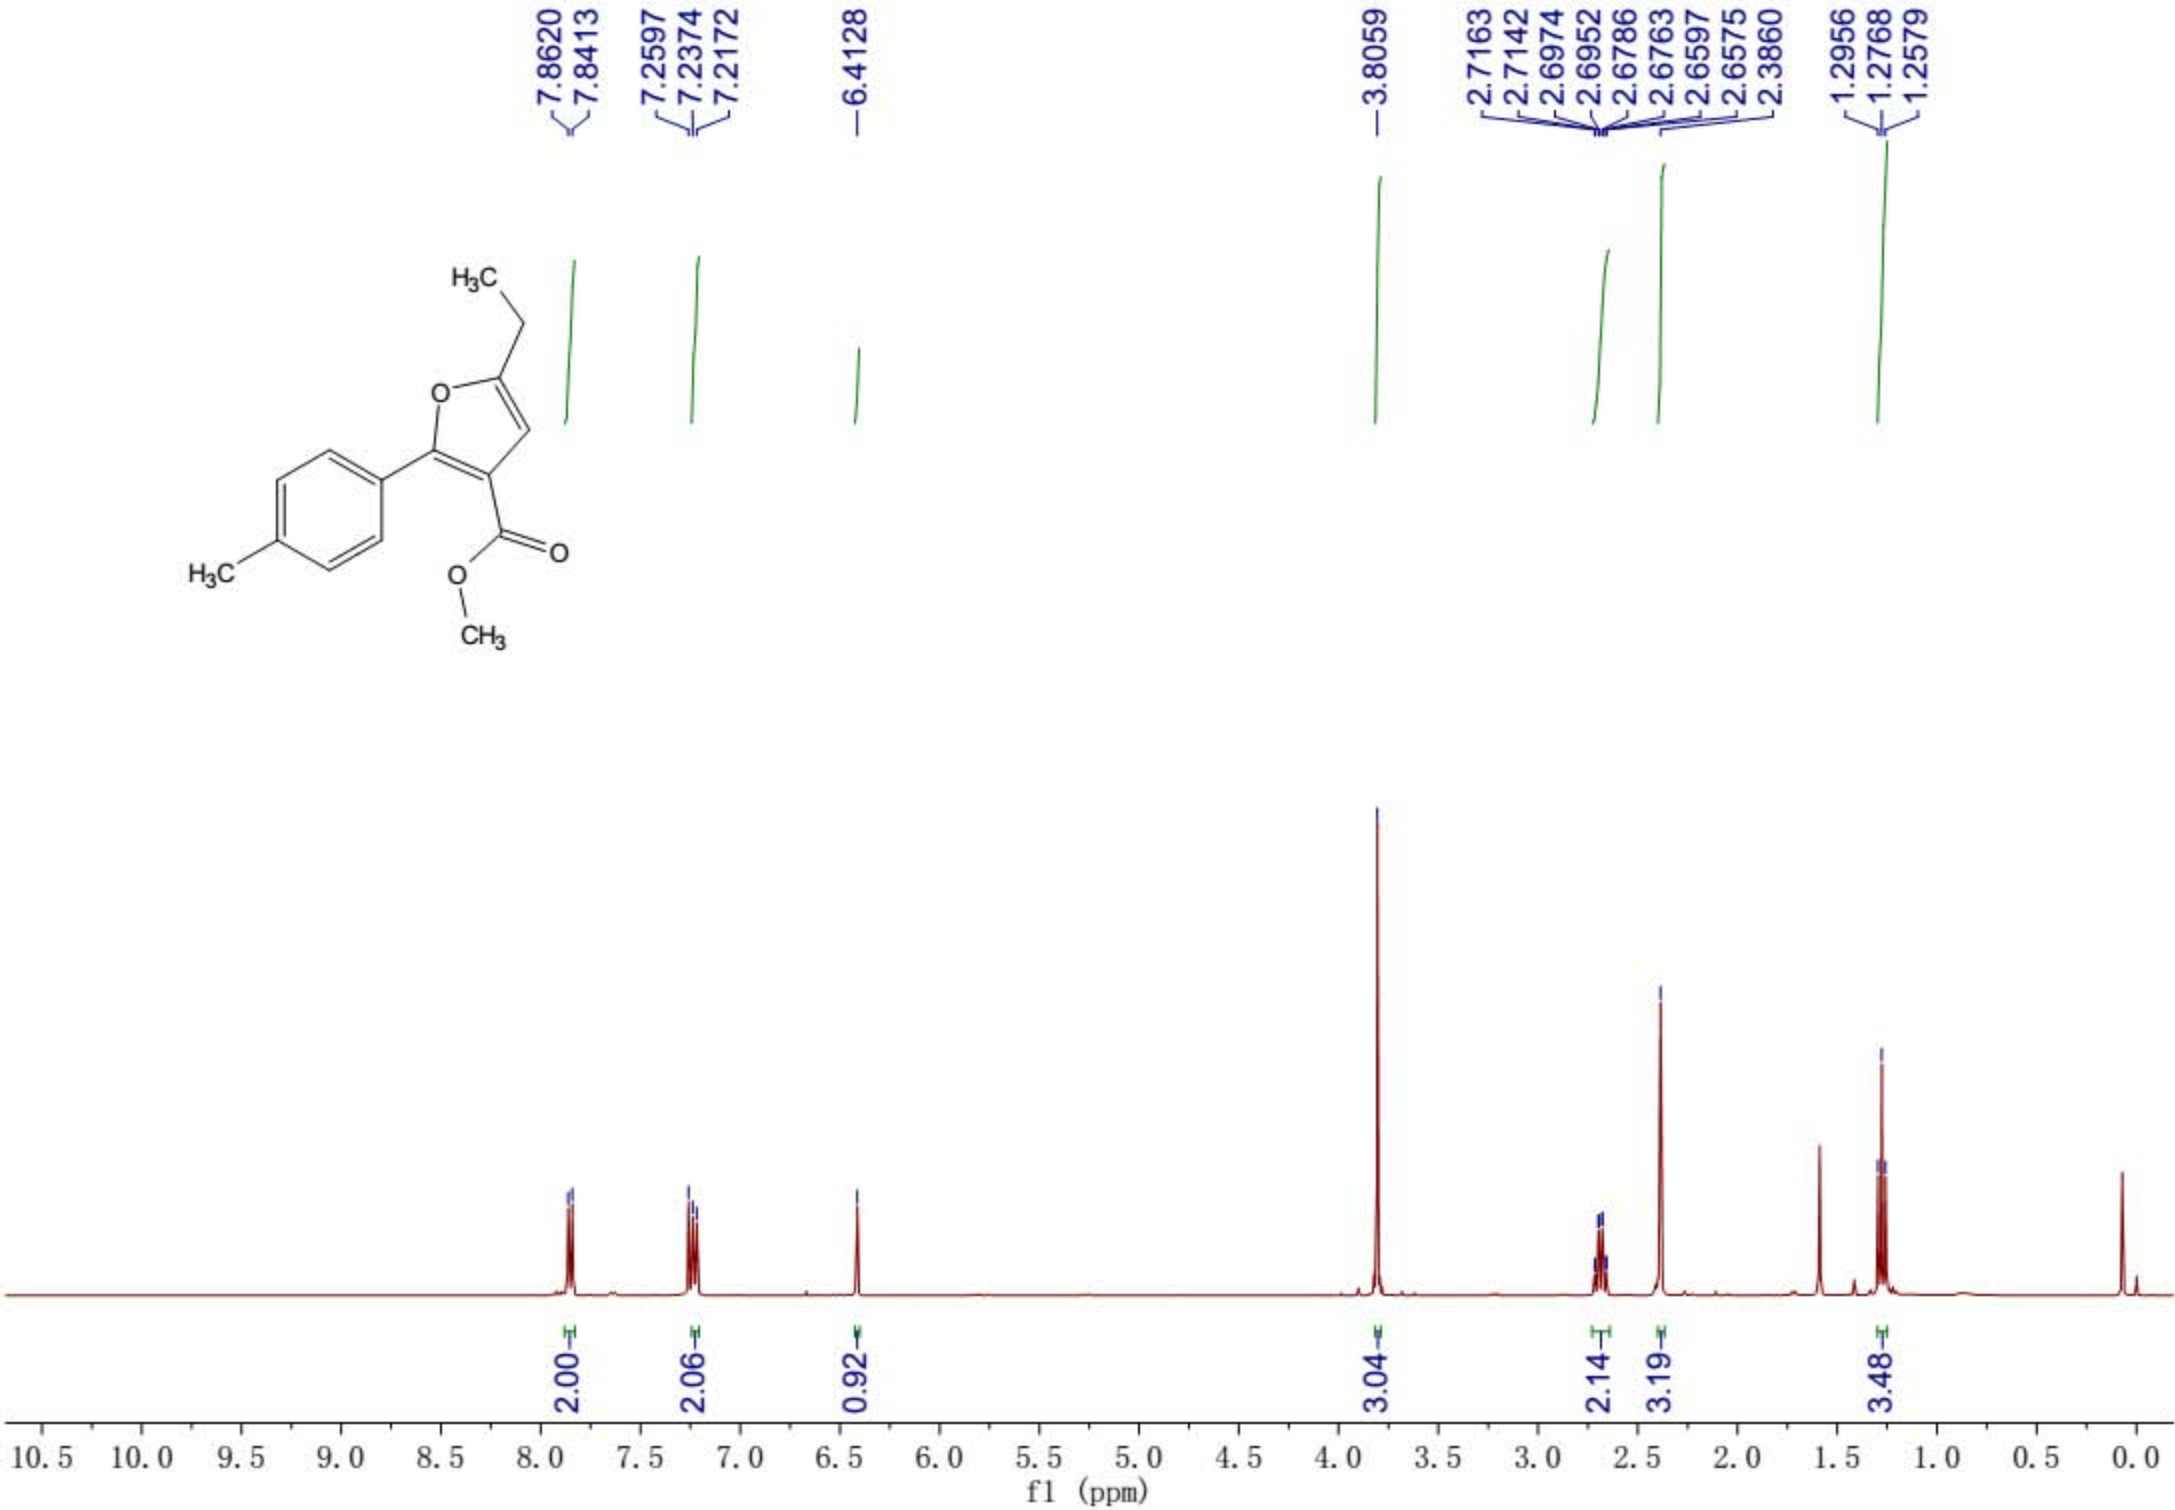

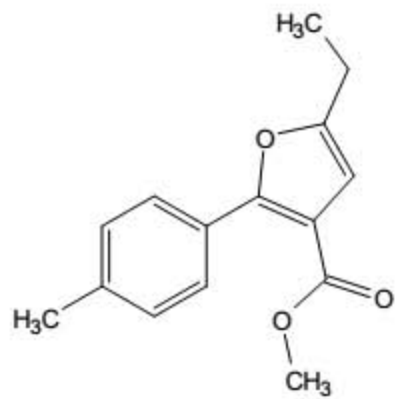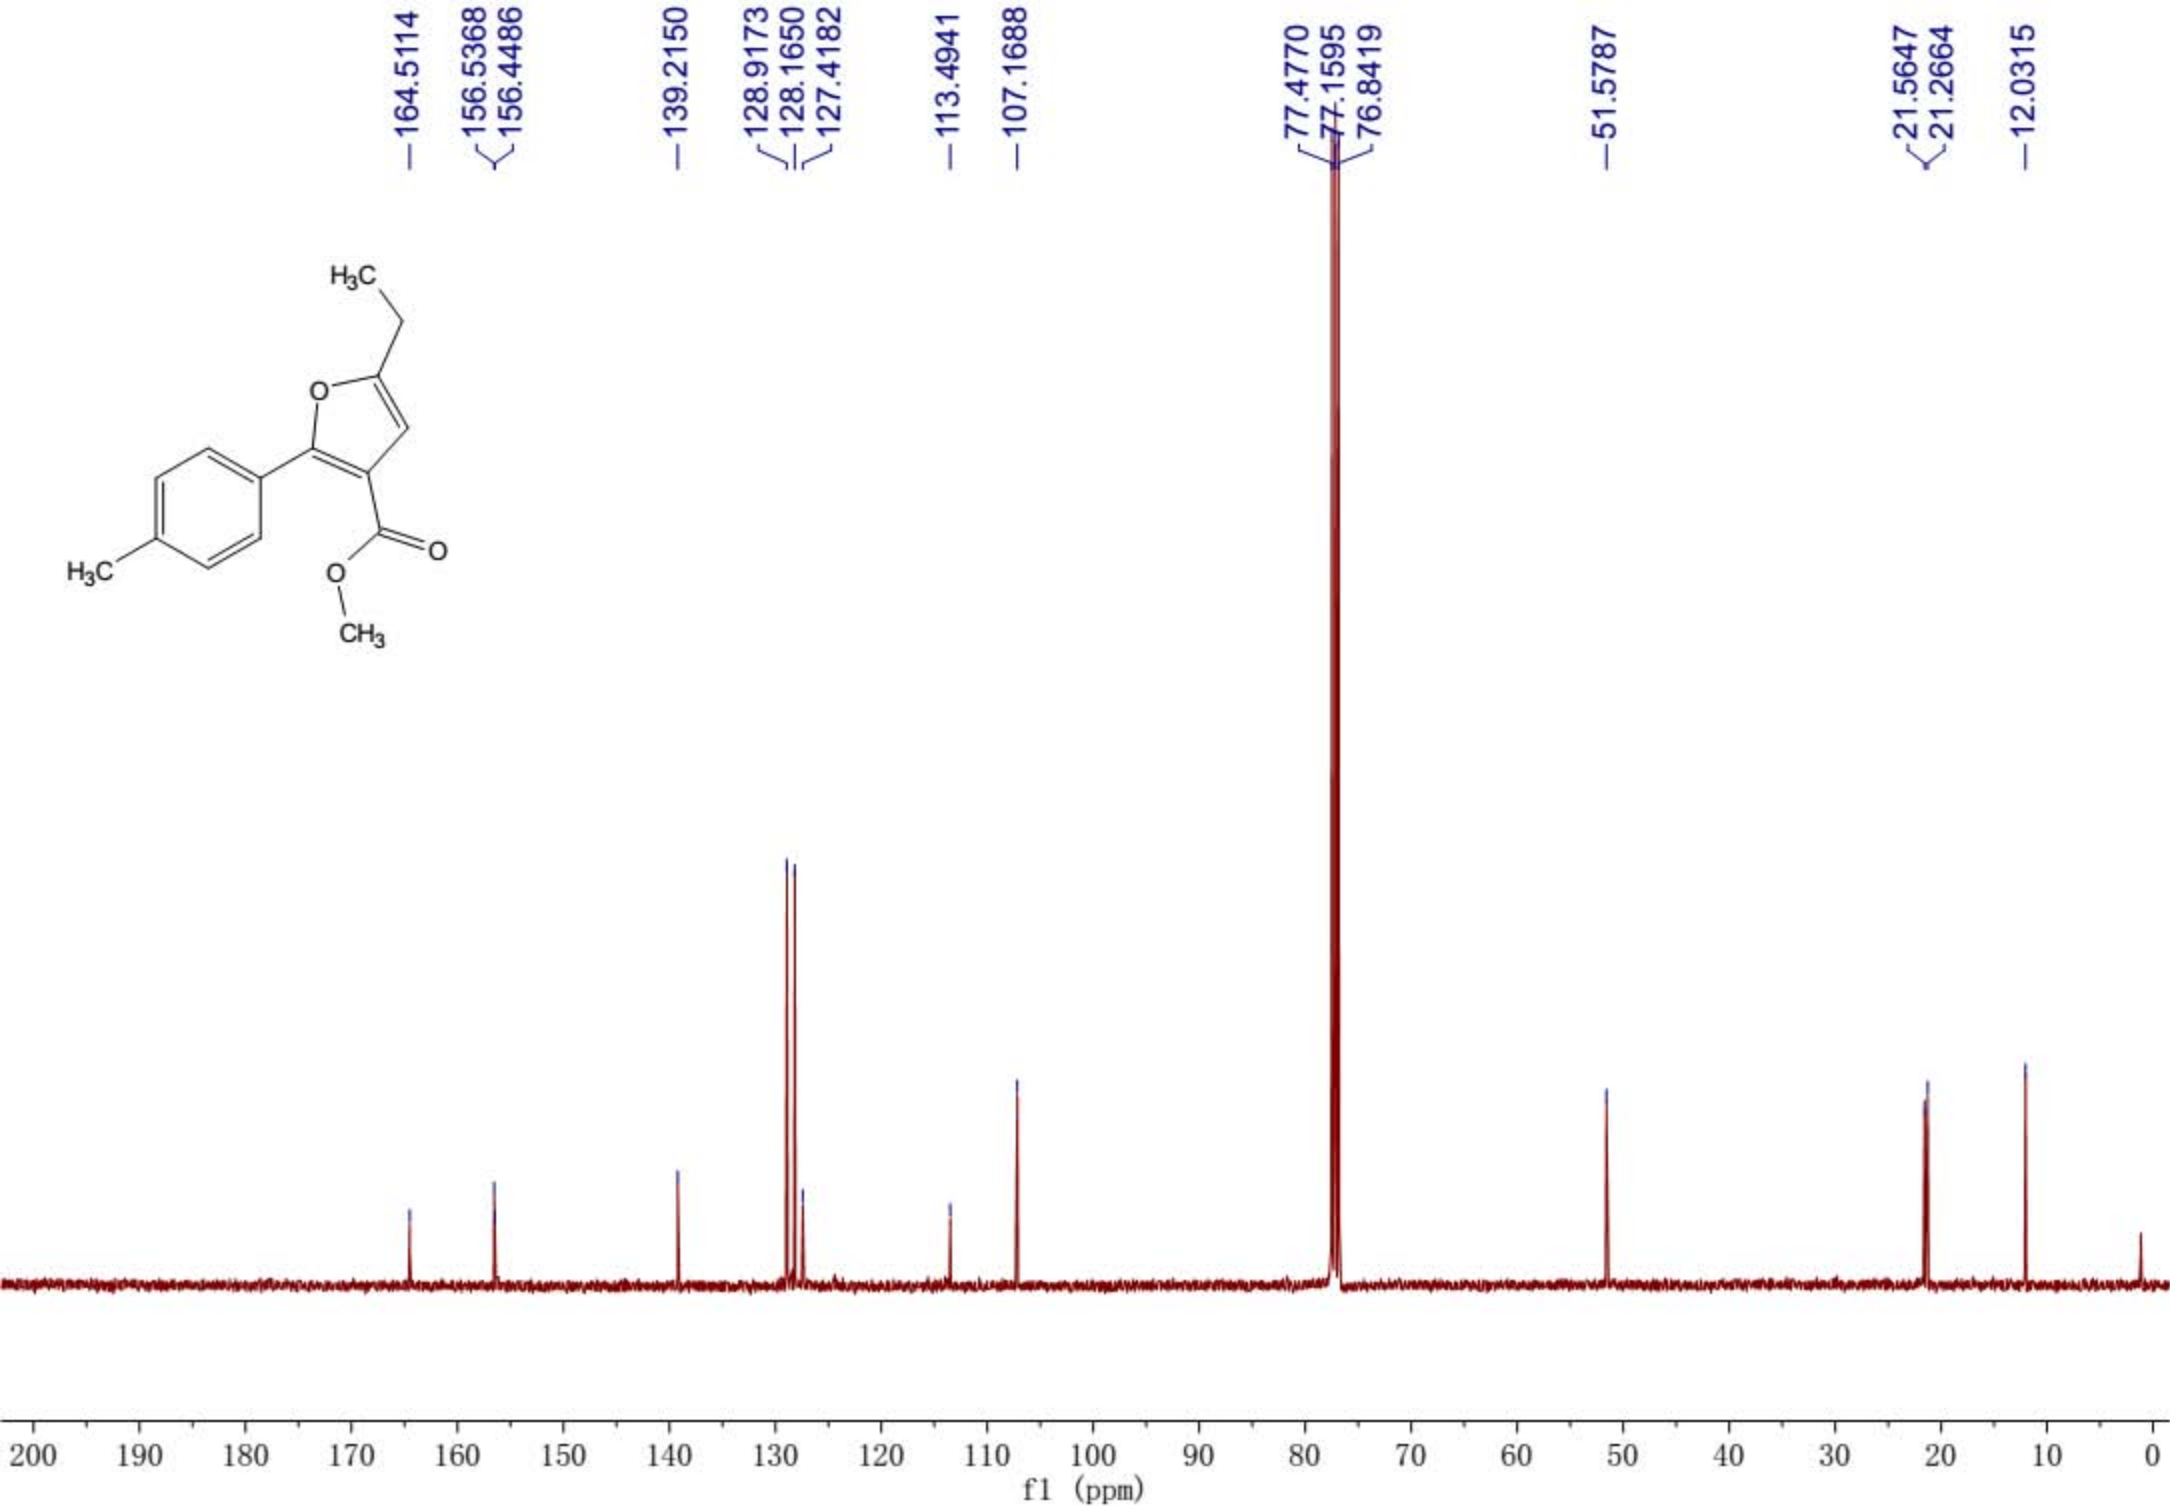

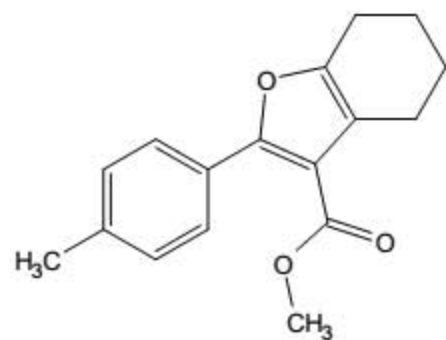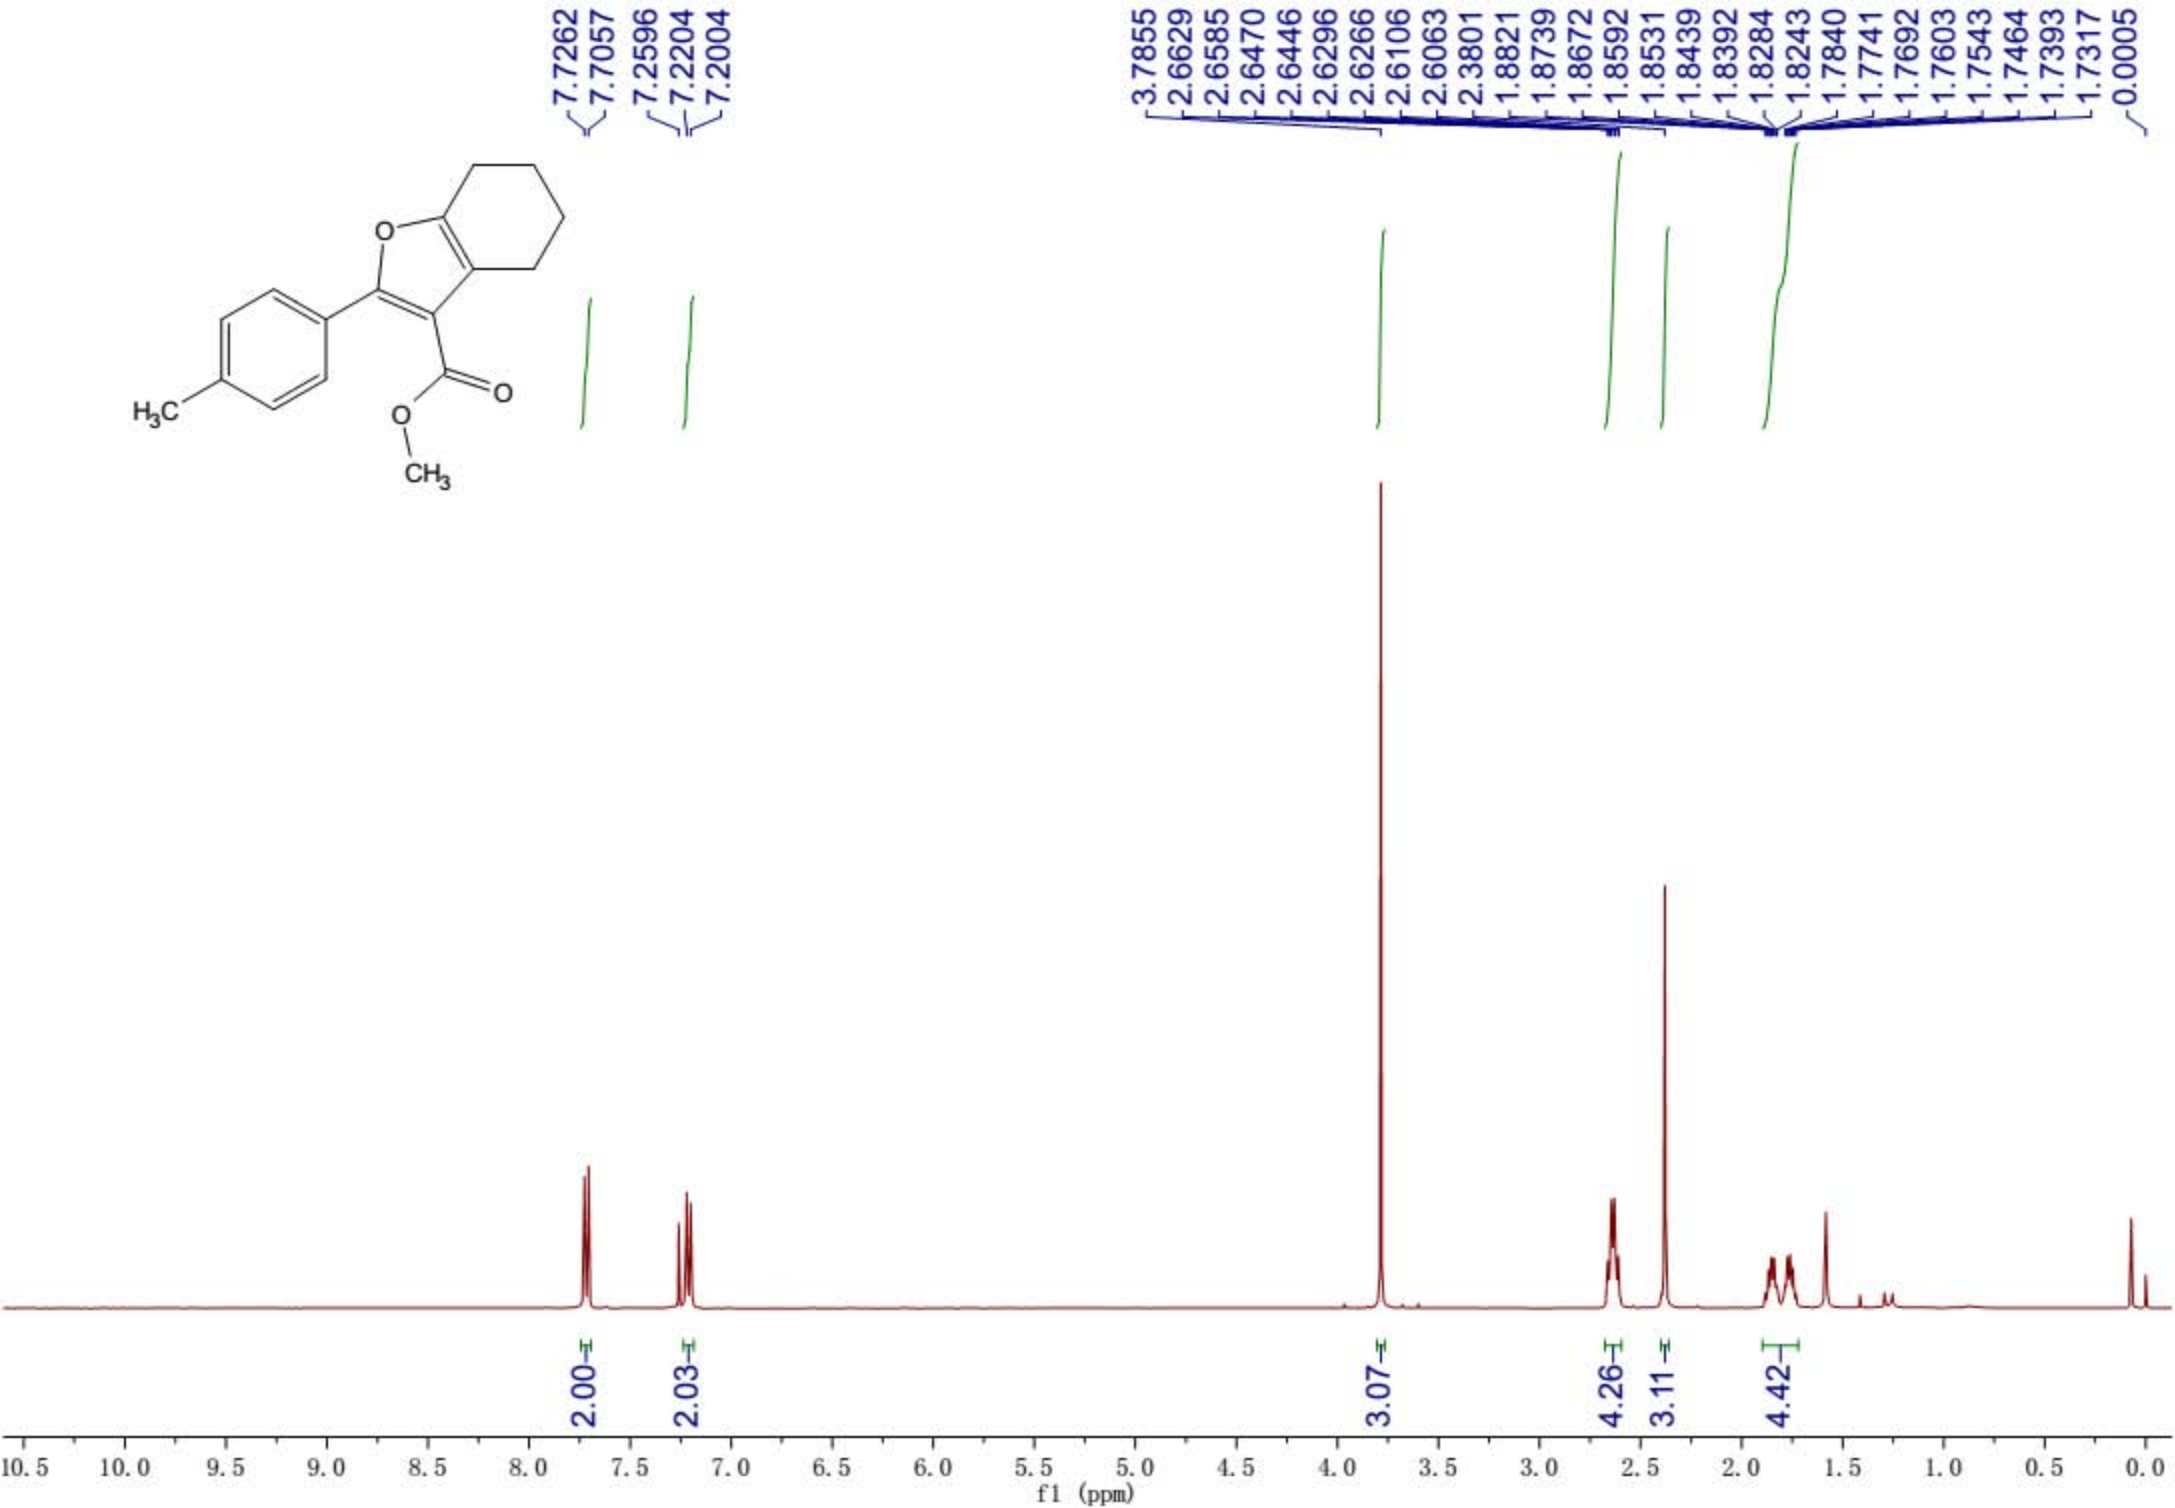

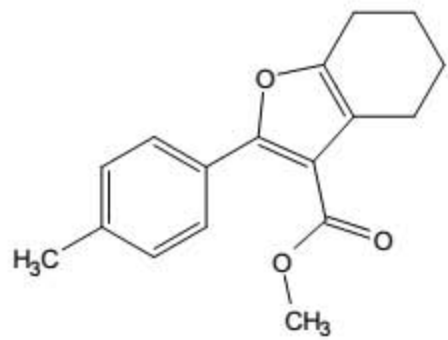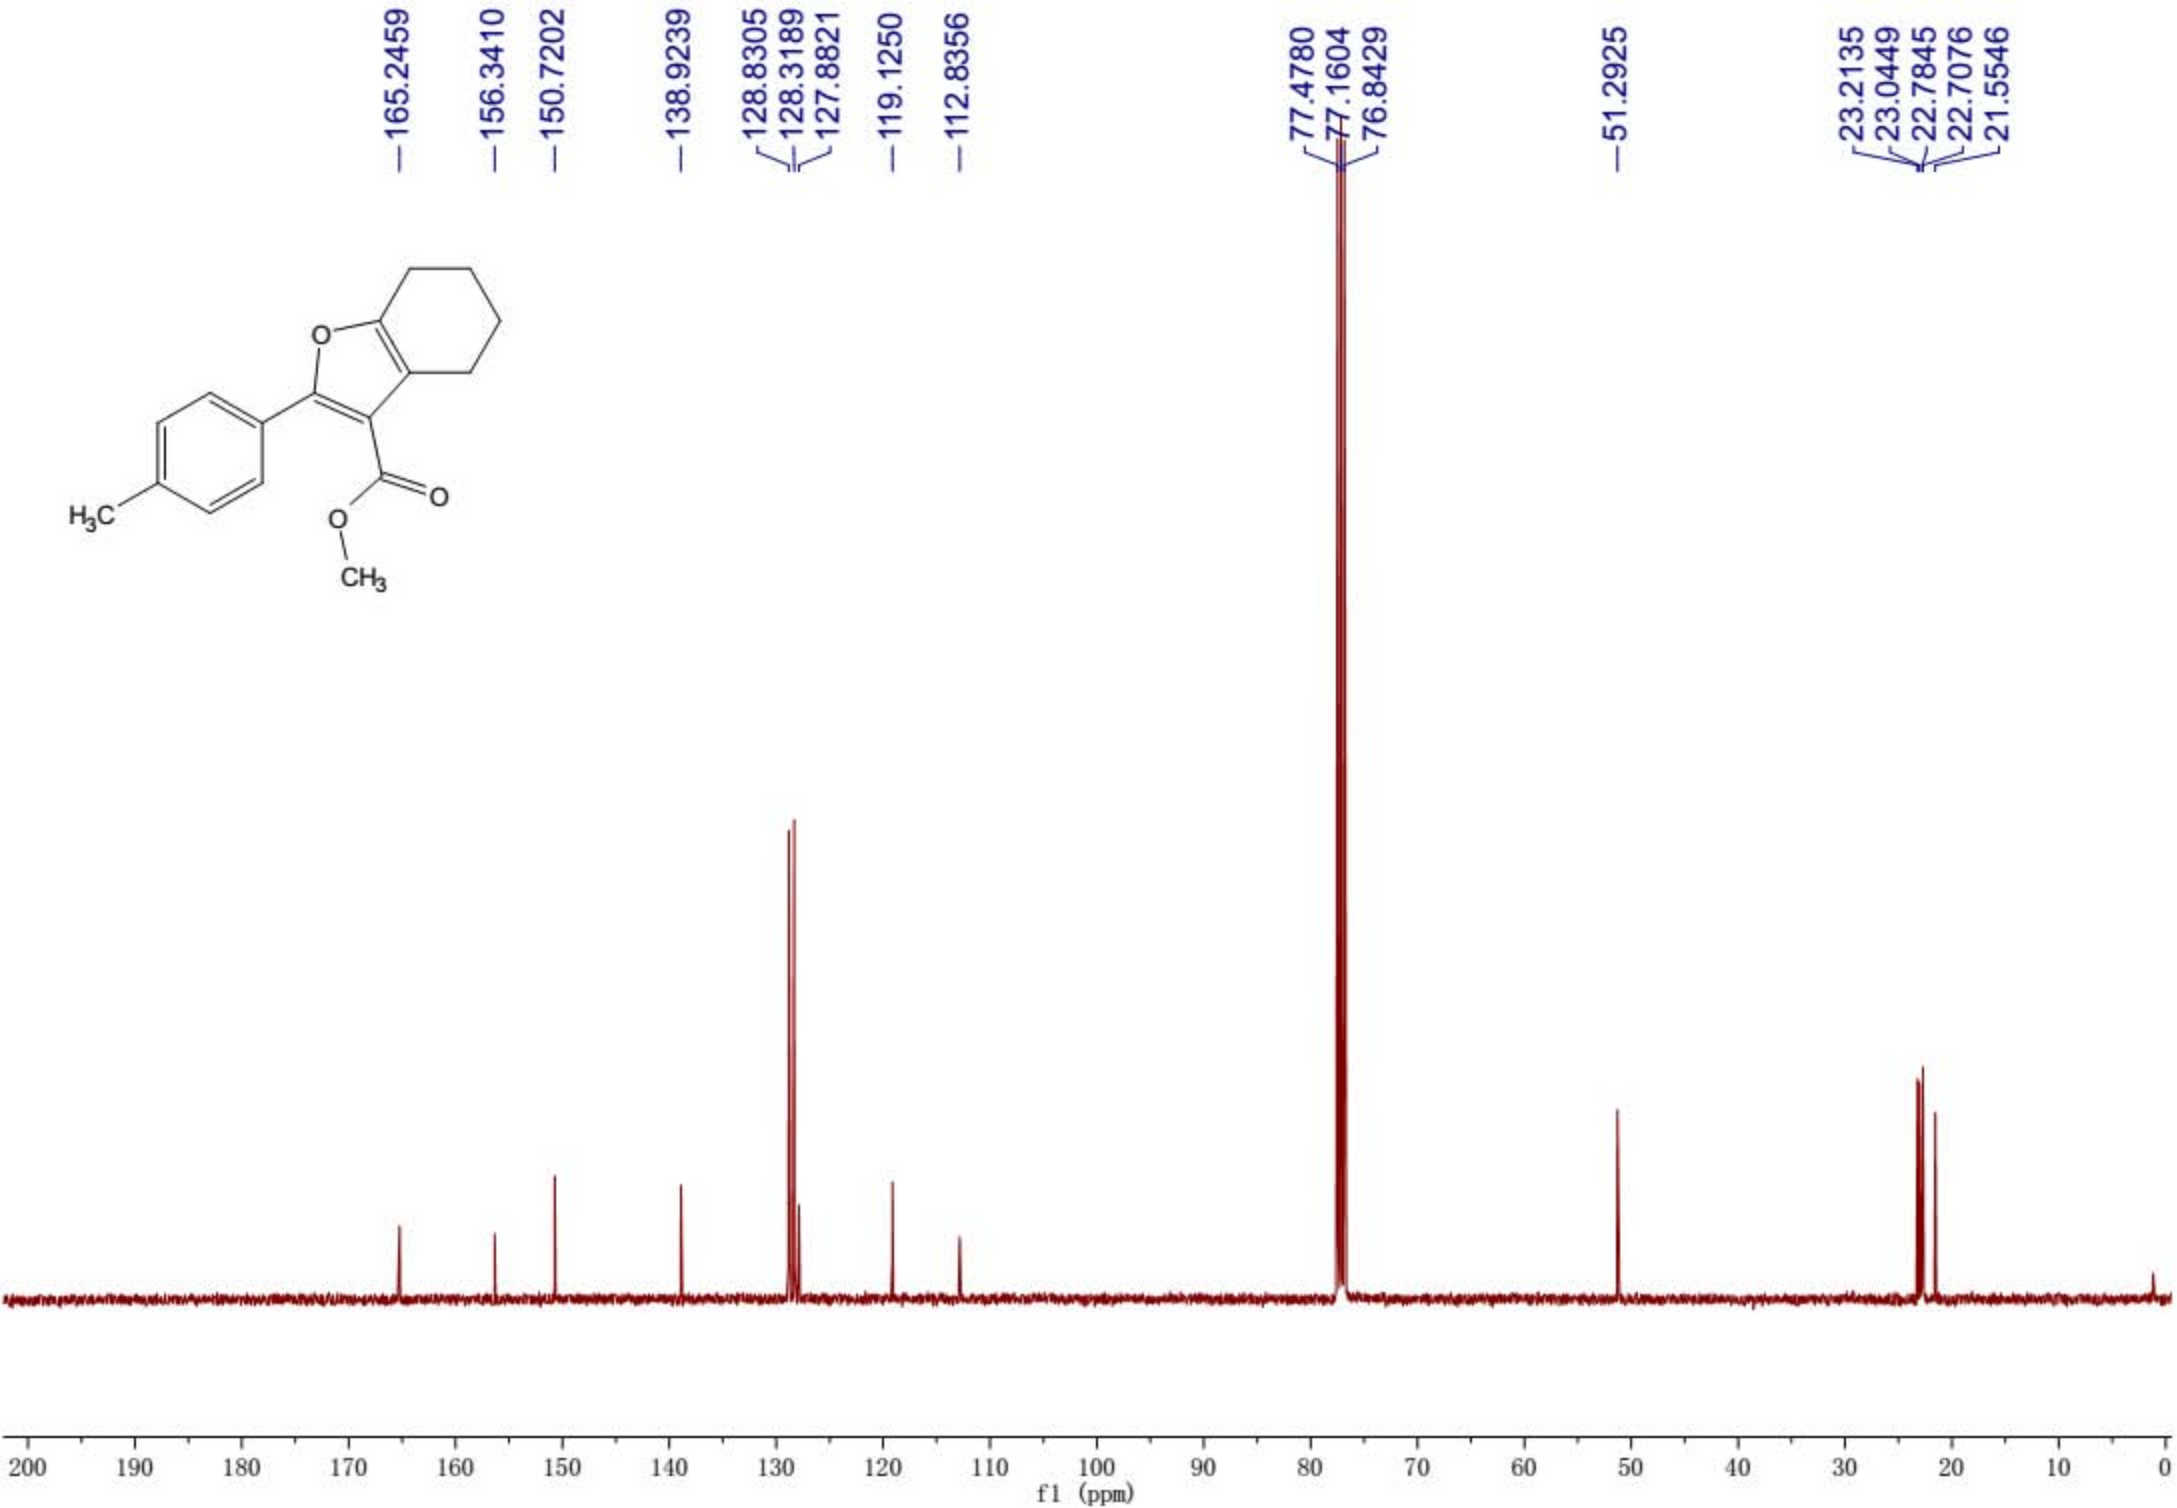

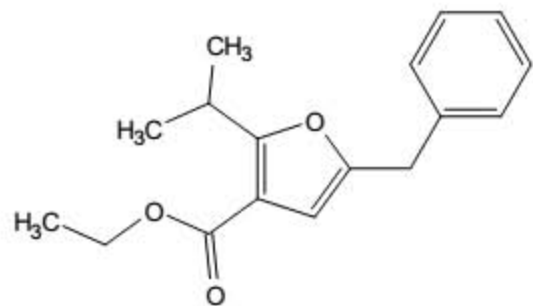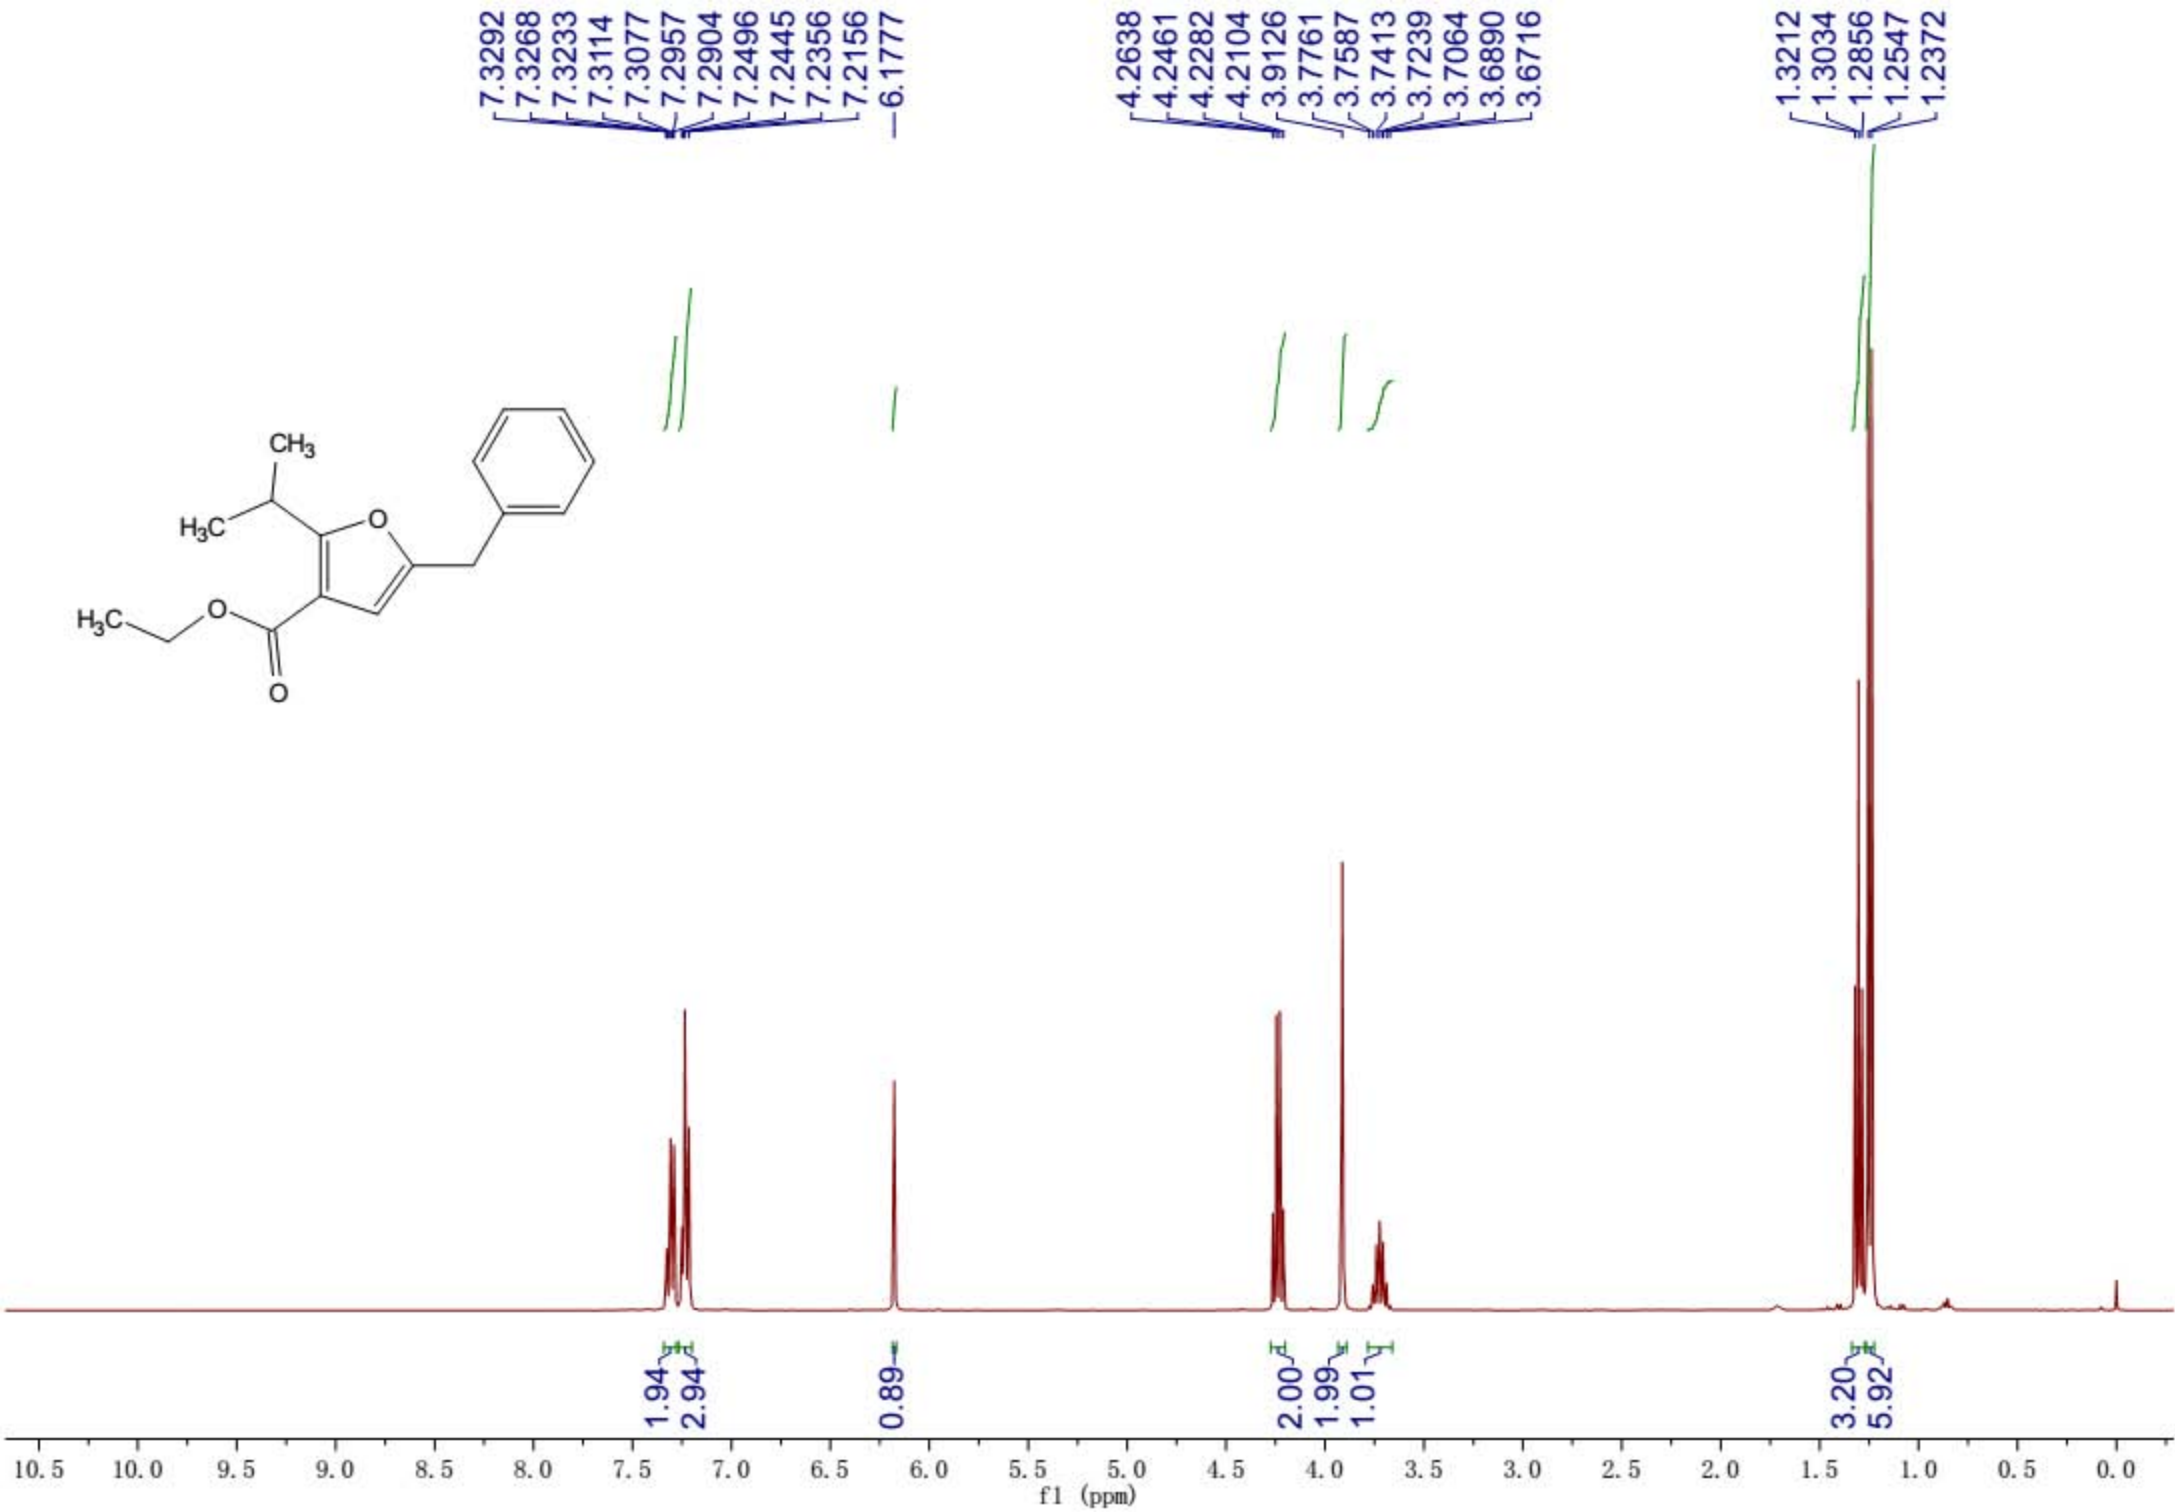

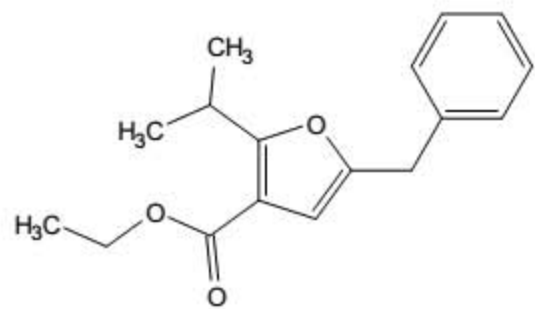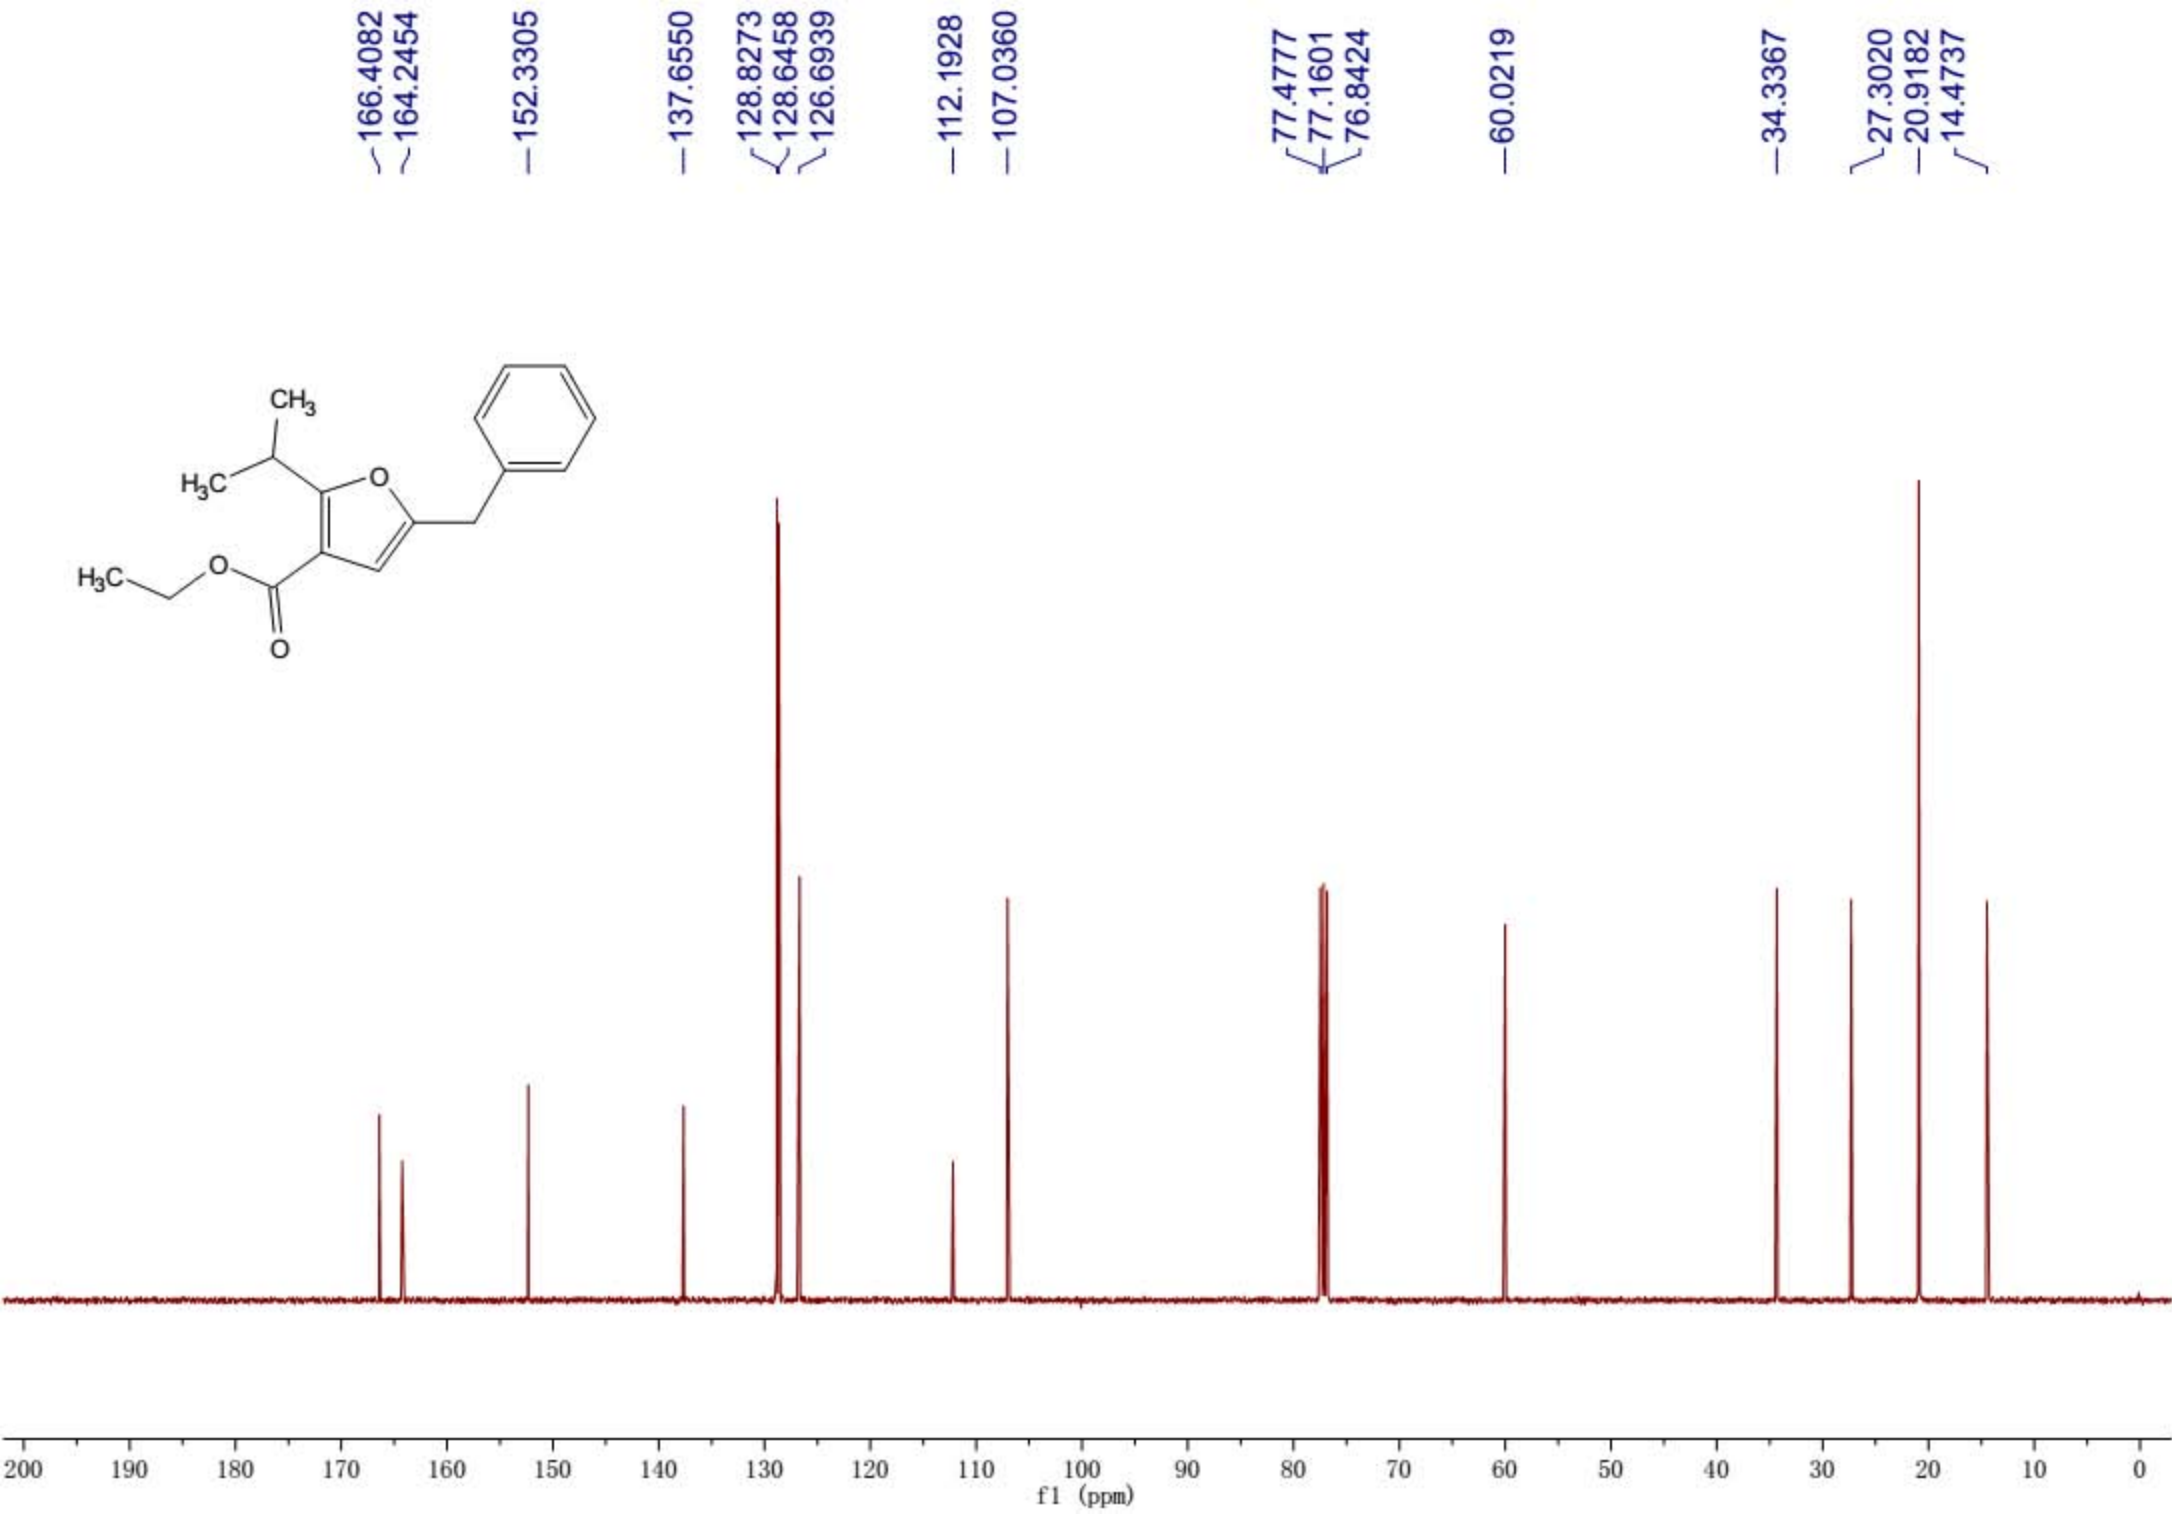

PHOSPHORUS  
7.7774  
7.7739  
7.7574  
7.4377  
7.4265  
7.4103  
7.3909  
7.3858  
7.3763  
7.3690  
7.2423

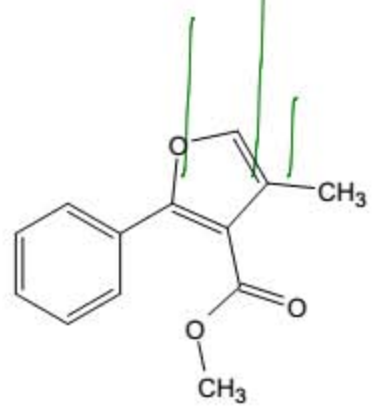

3.8001  
2.1947  
0.0001

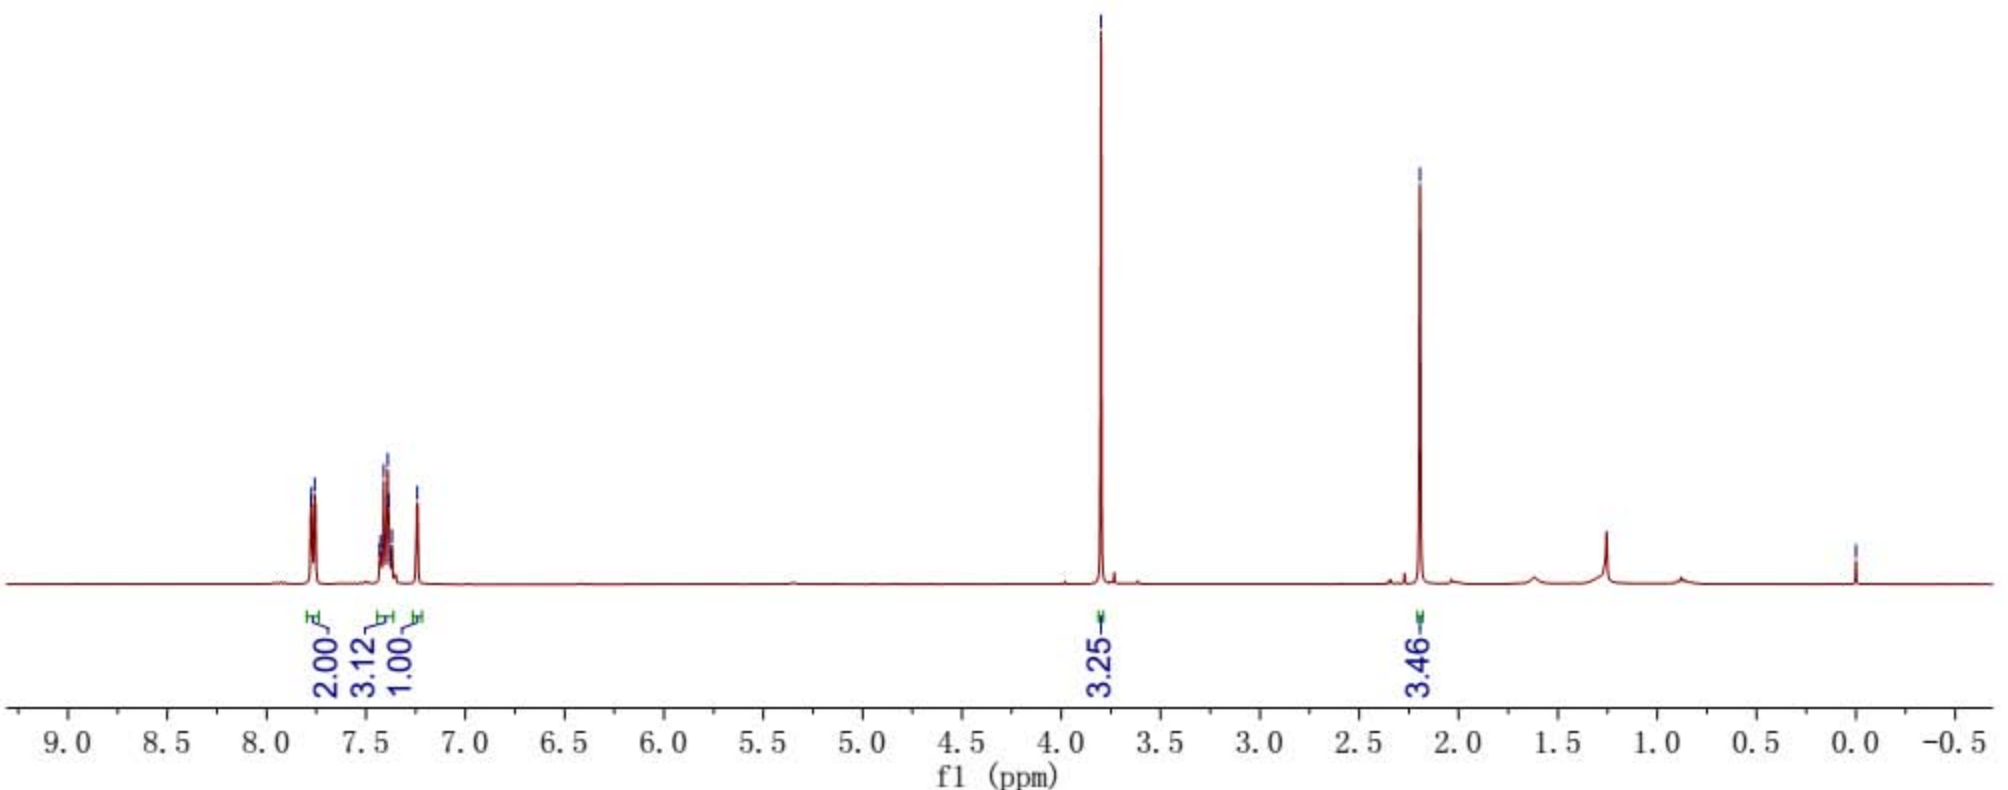

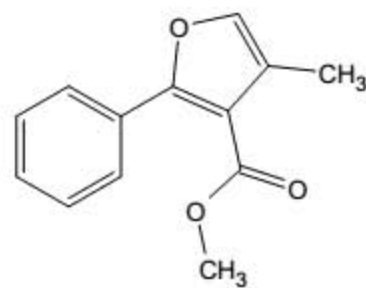

SPHON'S PARAMETERS  
—165.0451  
—158.1391

—139.3084  
—130.5198  
—129.1822  
—128.4694  
—128.1320  
—122.6127

—114.0664

{ 77.4774  
{ 77.1599  
{ 76.8410

—51.4081

—10.2678

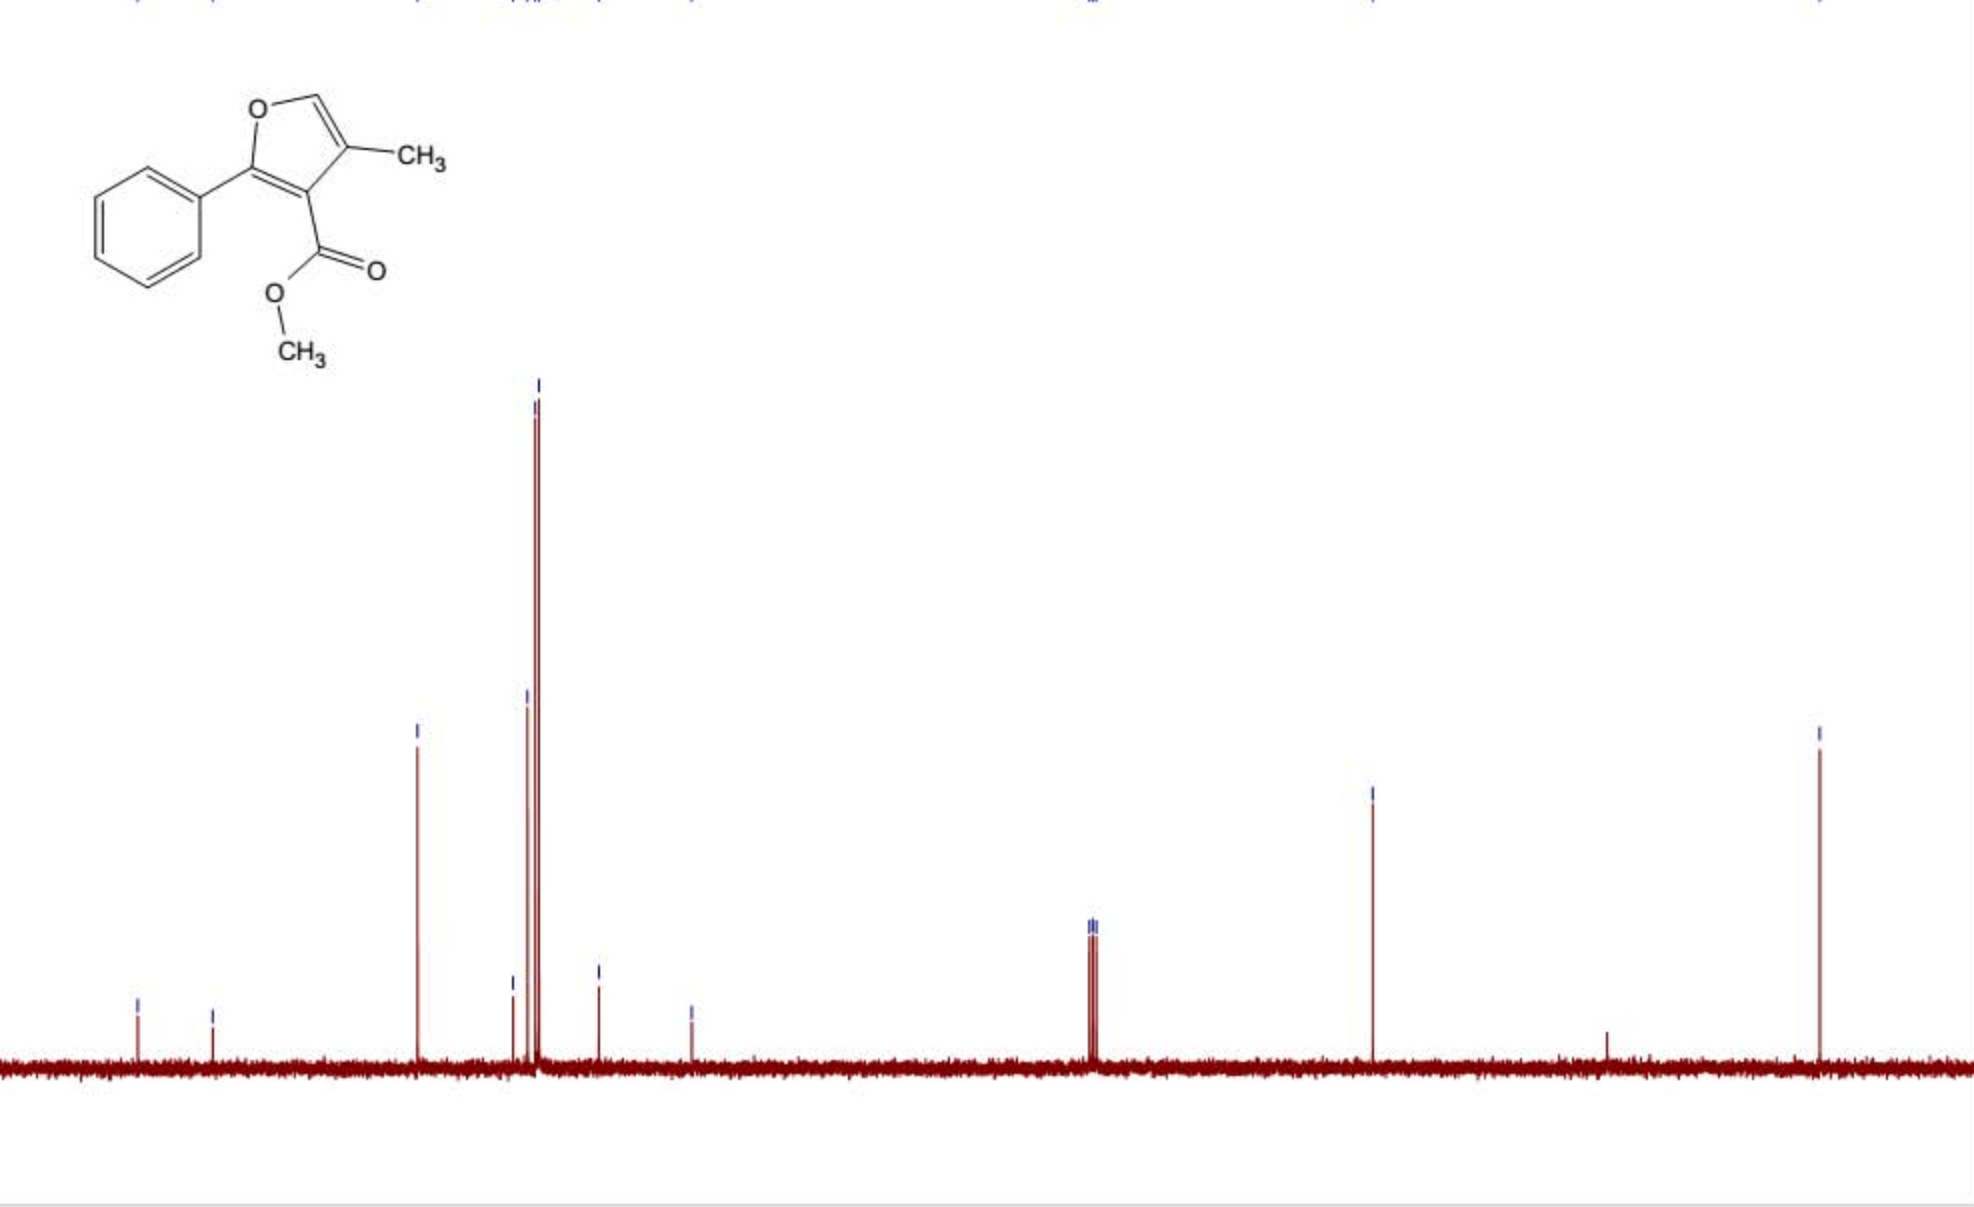

170 160 150 140 130 120 110 100 90 80 70 60 50 40 30 20 10 0

f1 (ppm)



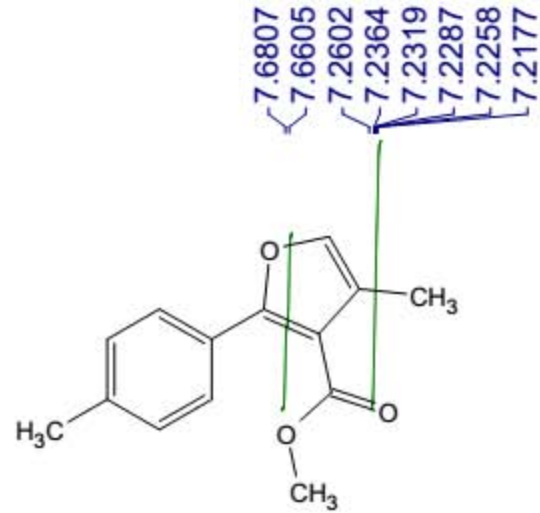

7.6807  
7.6605  
7.2602  
7.2364  
7.2319  
7.2287  
7.2258  
7.2177

3.8060

2.3919  
2.1978

2.00

3.04

3.10

3.12

3.12

9.0 8.5 8.0 7.5 7.0 6.5 6.0 5.5 5.0 4.5 4.0 3.5 3.0 2.5 2.0 1.5 1.0 0.5 0.0 -0.5  
f1 (ppm)

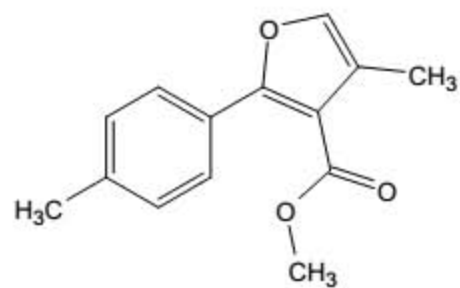

—165.1104  
—158.4765  
—139.2790  
—138.9977  
—128.8483  
—128.3880  
—127.6922  
—122.5059  
—113.5283  
  
—77.4780  
—77.1602  
—76.8427  
  
—51.3563  
  
—21.5270  
—10.3174

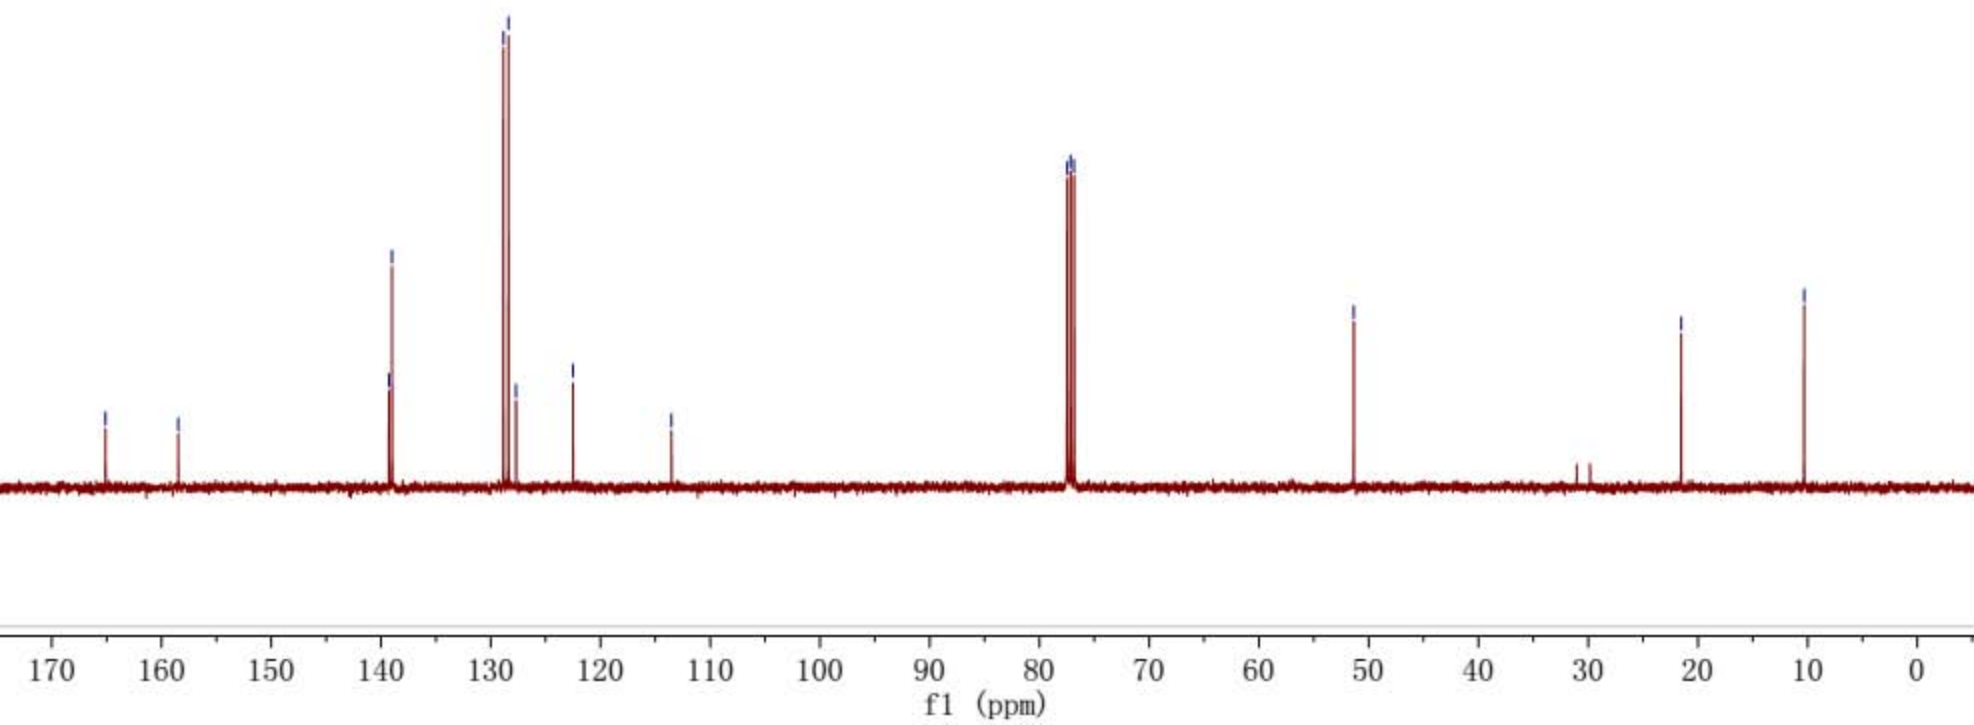

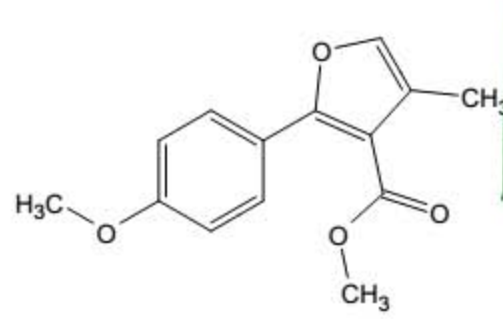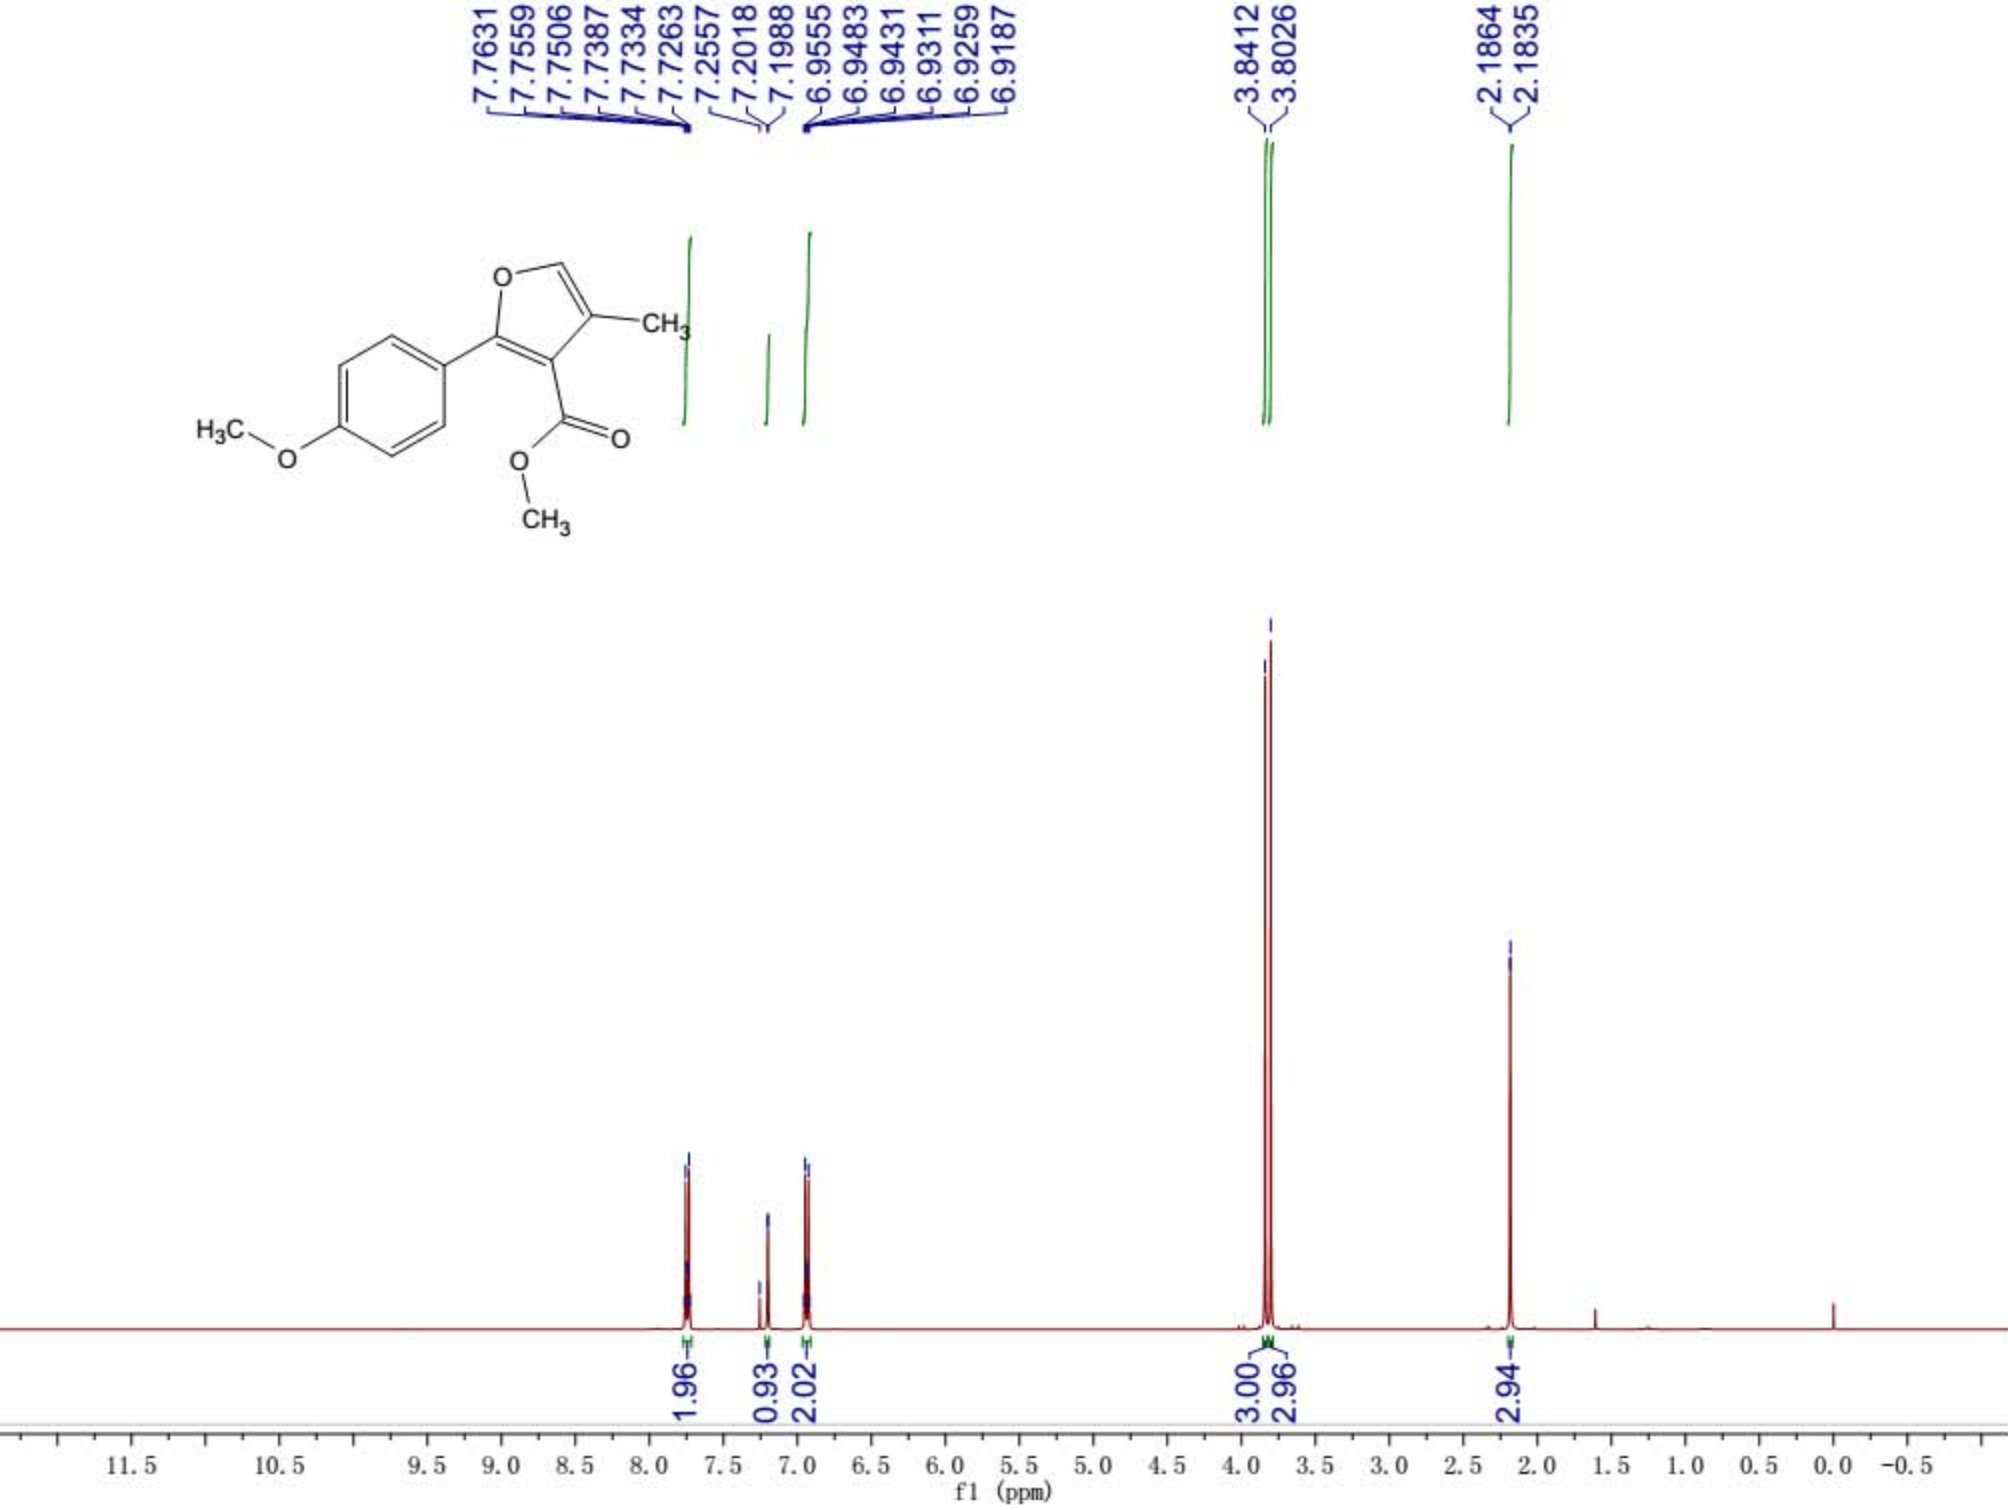

165.1780  
160.3398  
158.5173

138.7299  
130.0371  
123.1560  
122.4657  
113.5586  
112.9563

77.4779  
77.1605  
76.8427

55.4142  
51.3366

10.4206

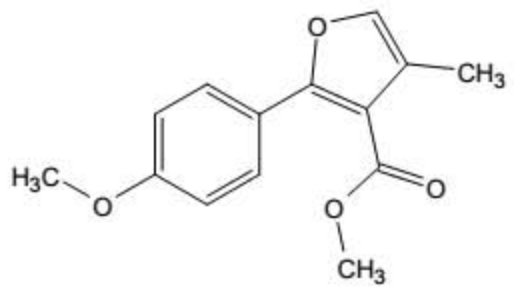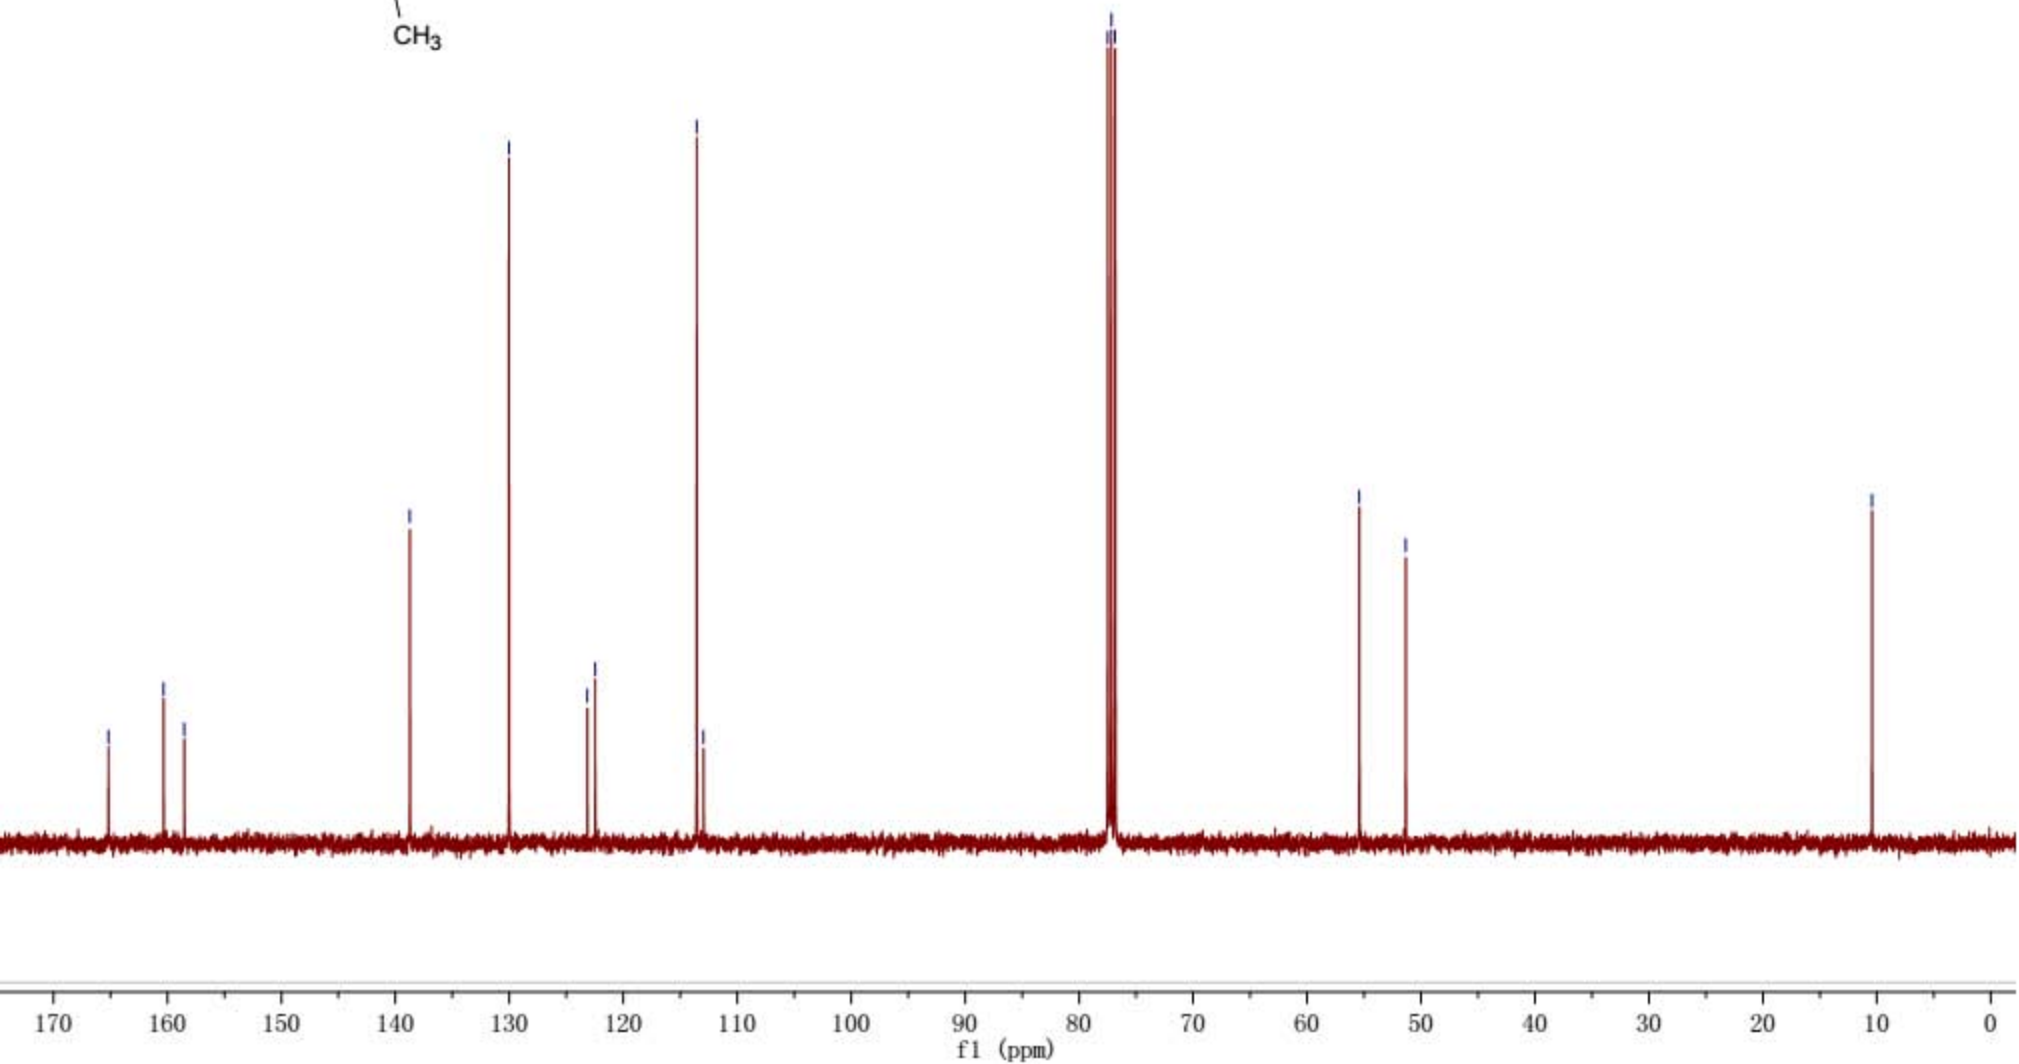

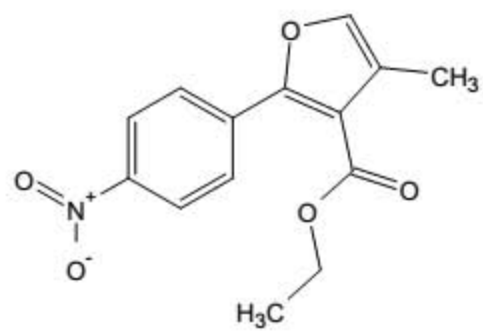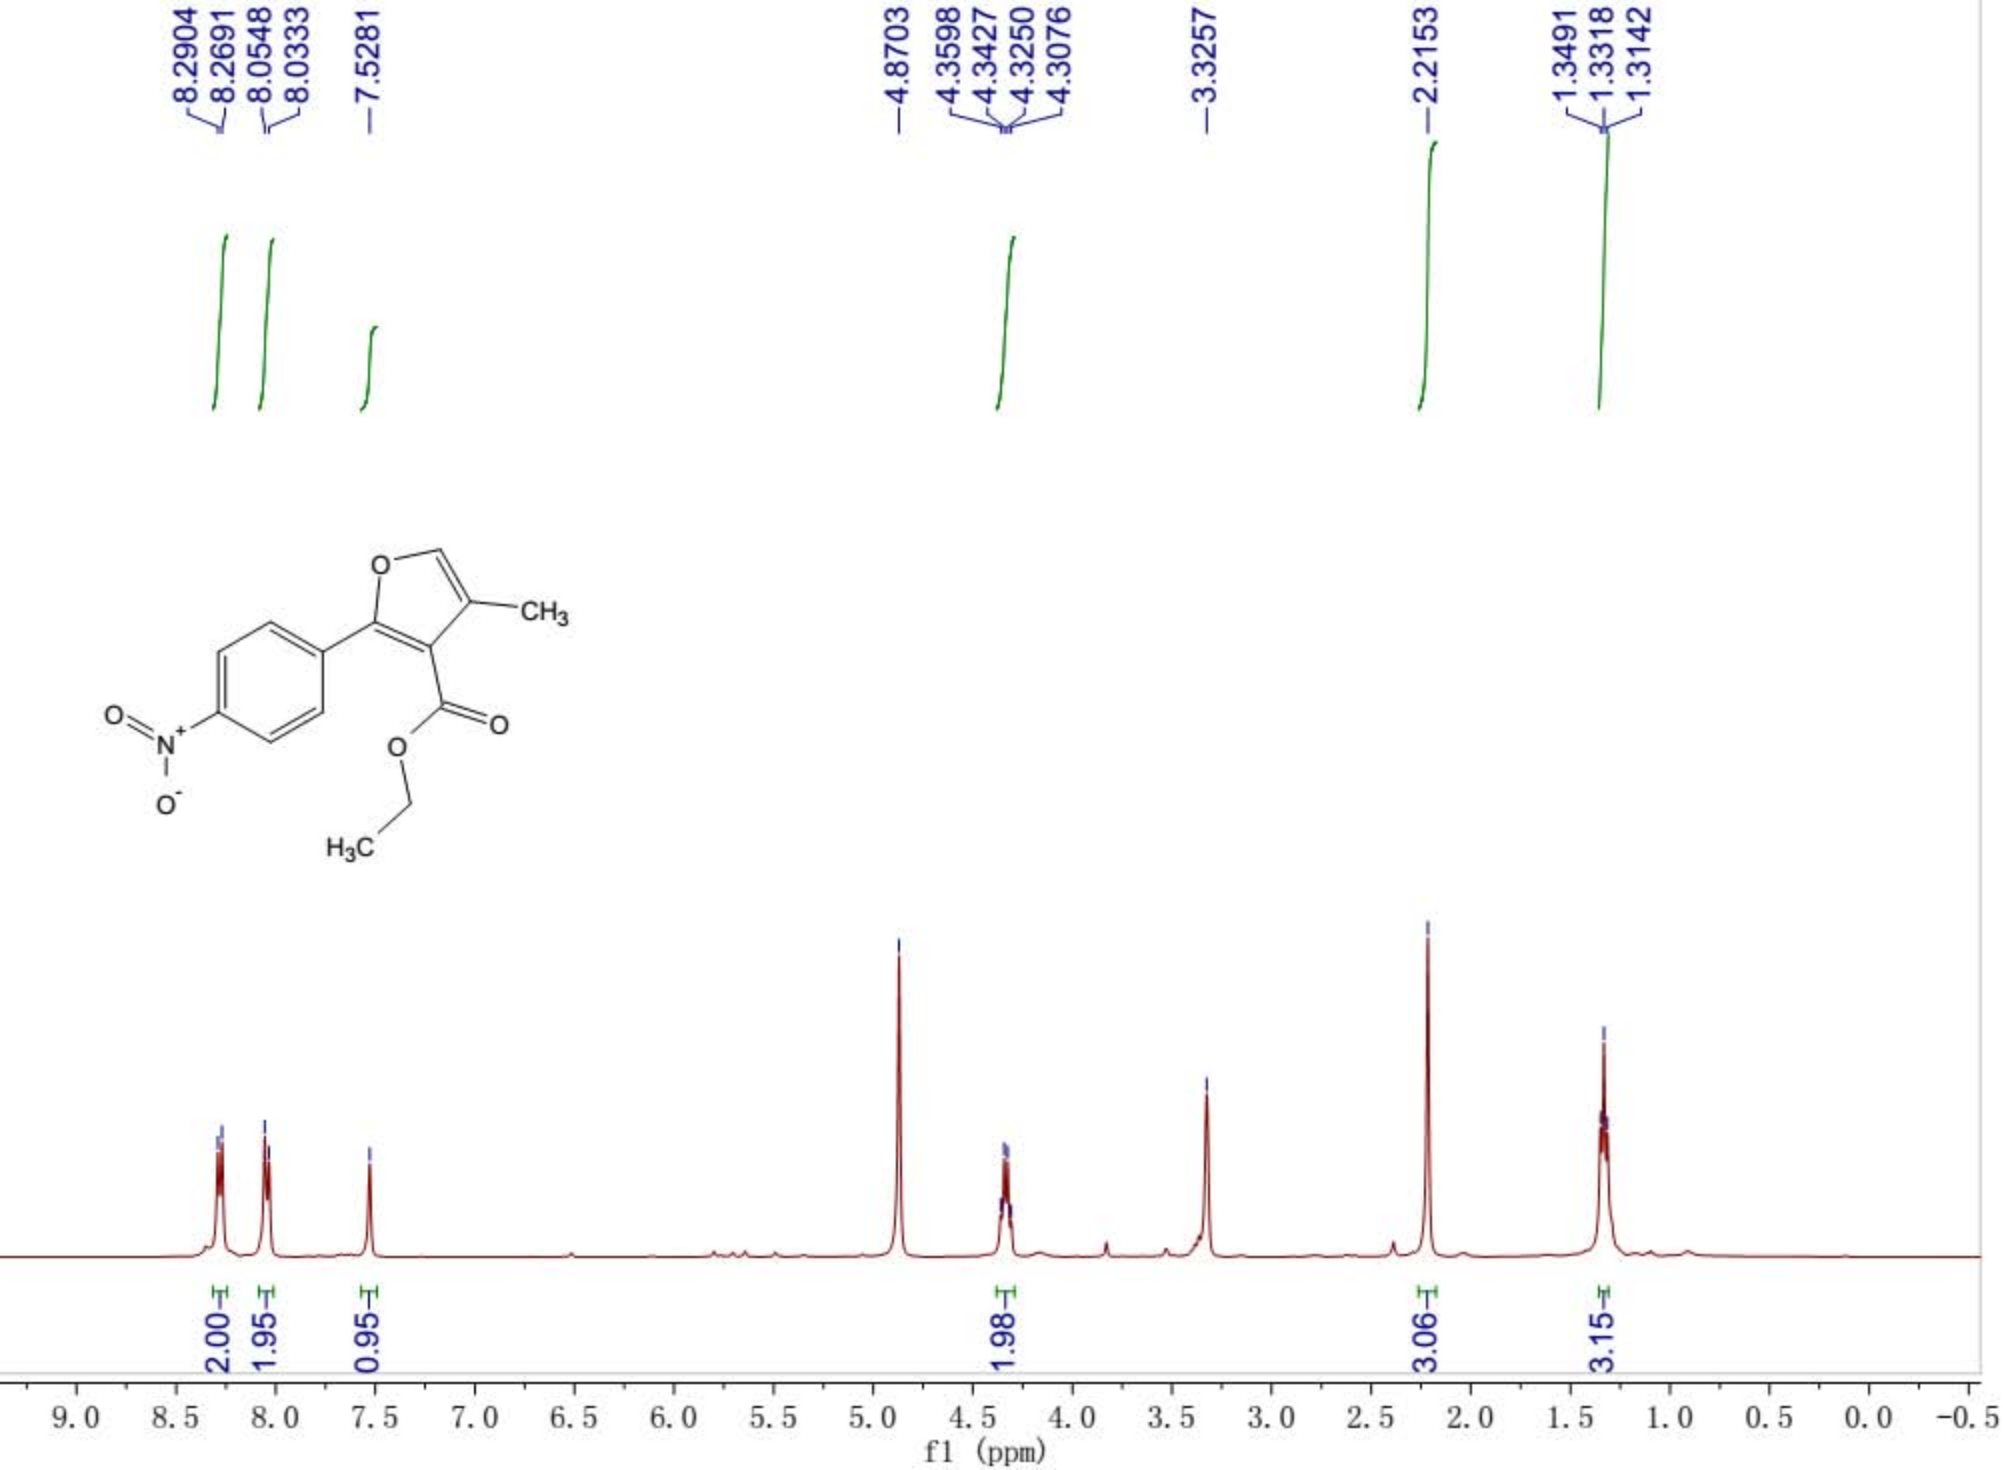

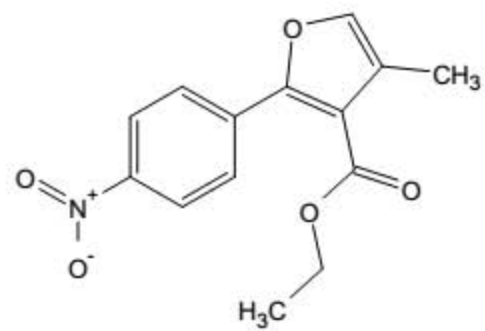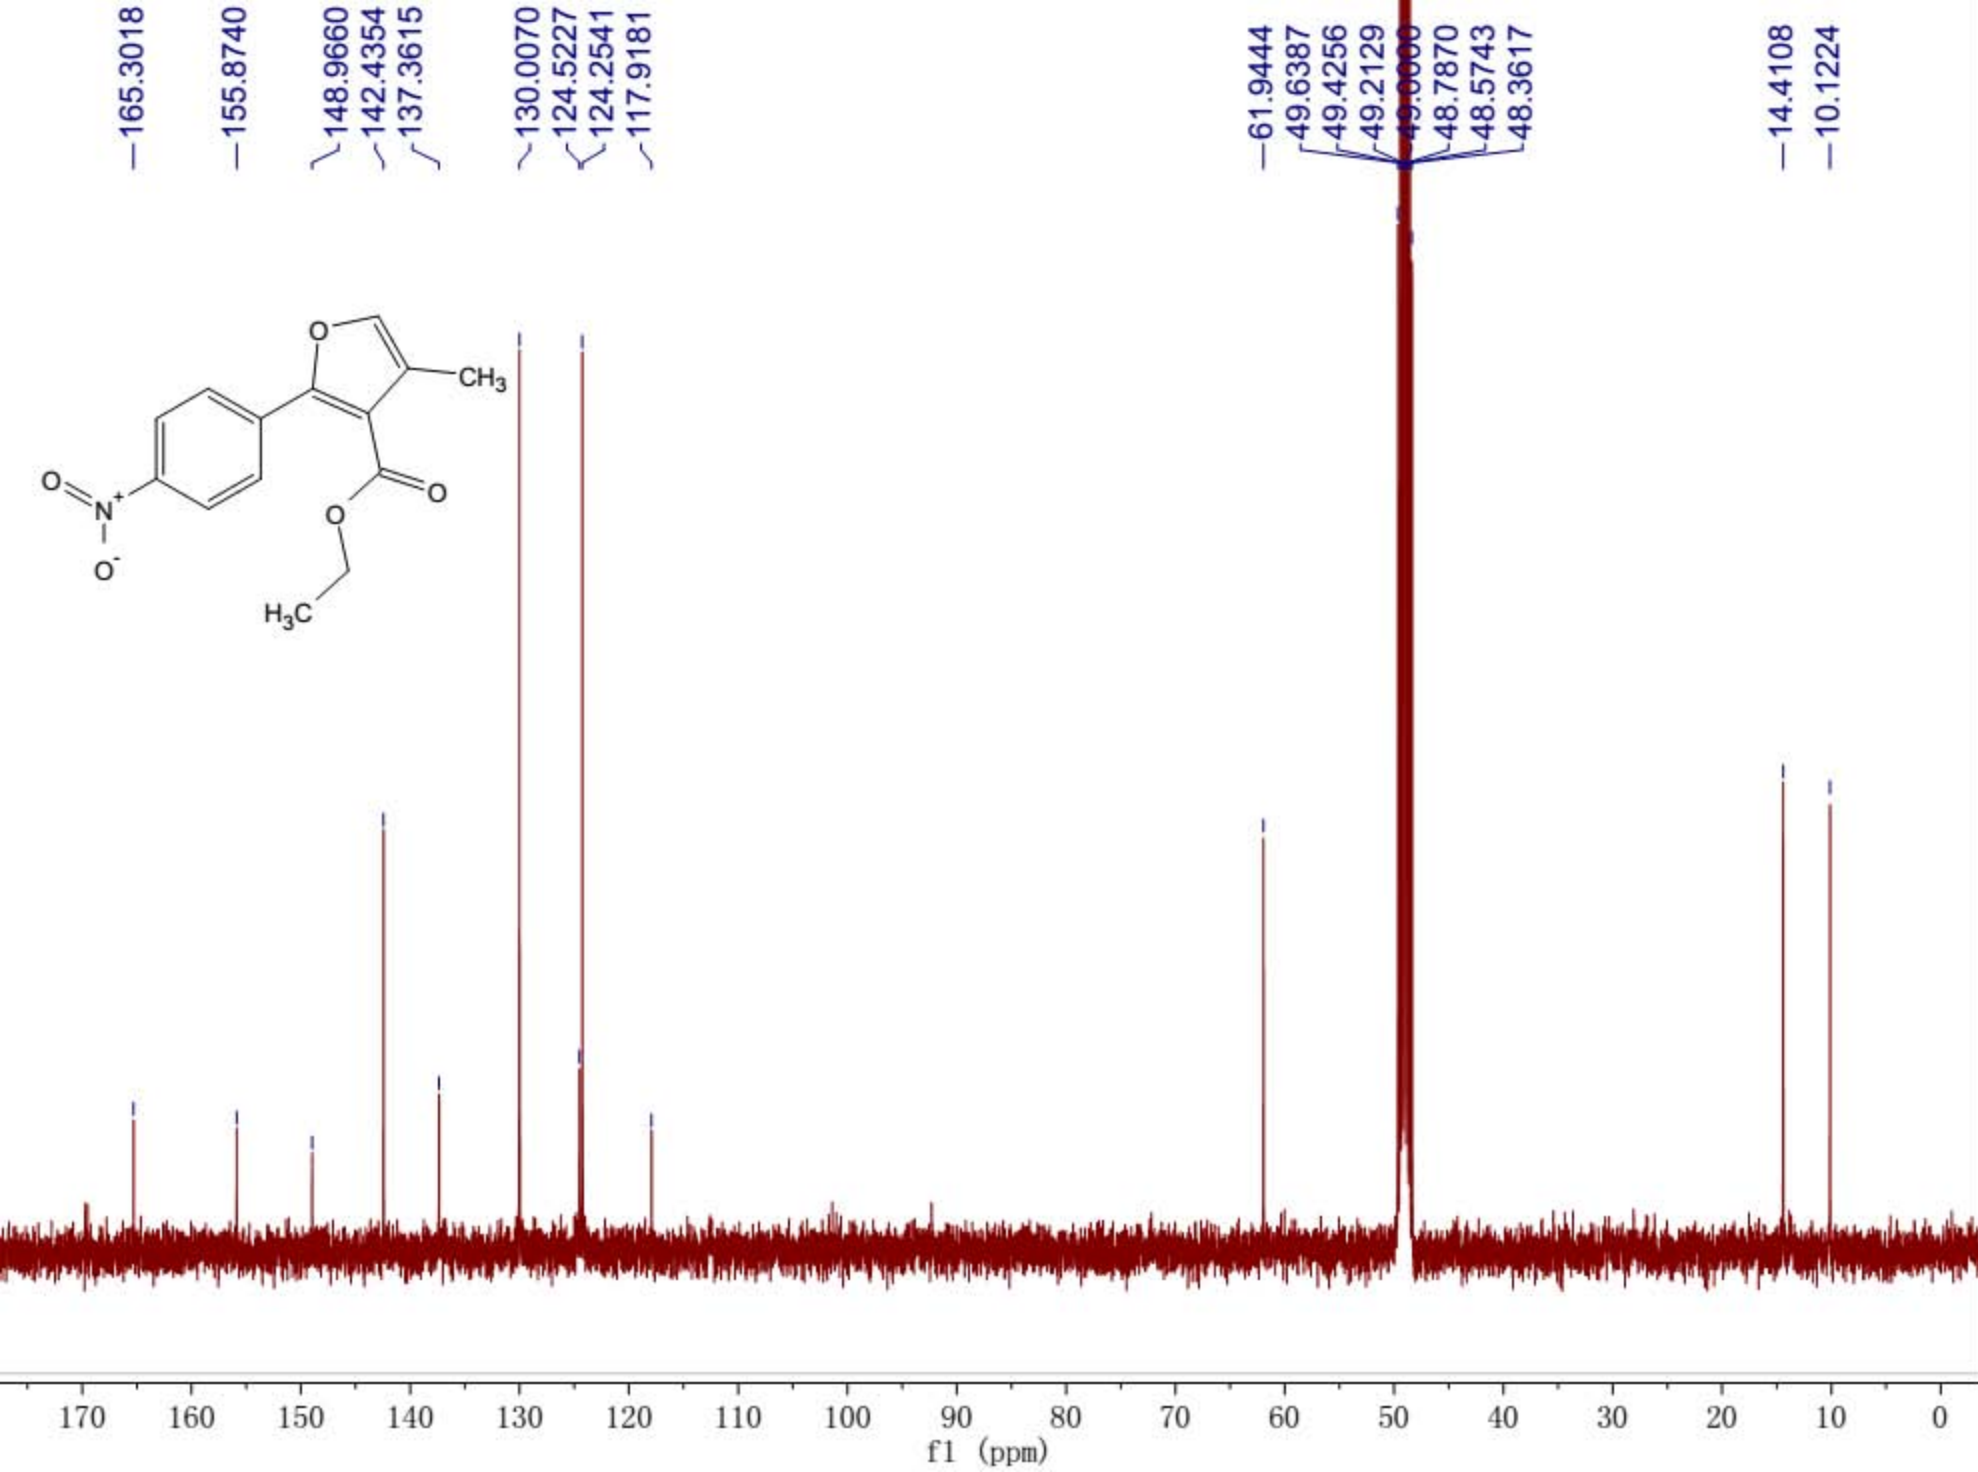

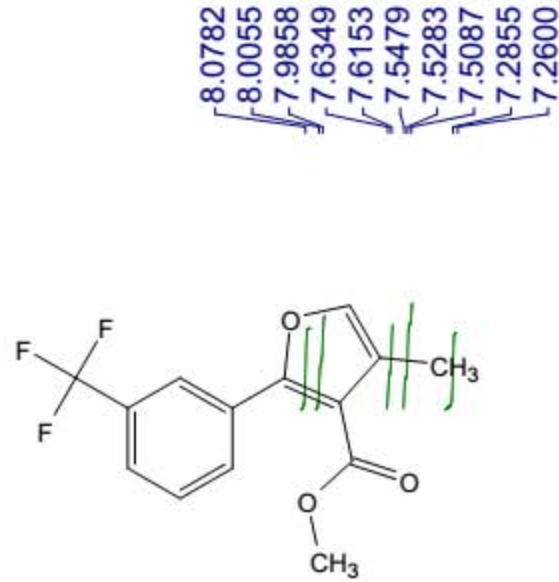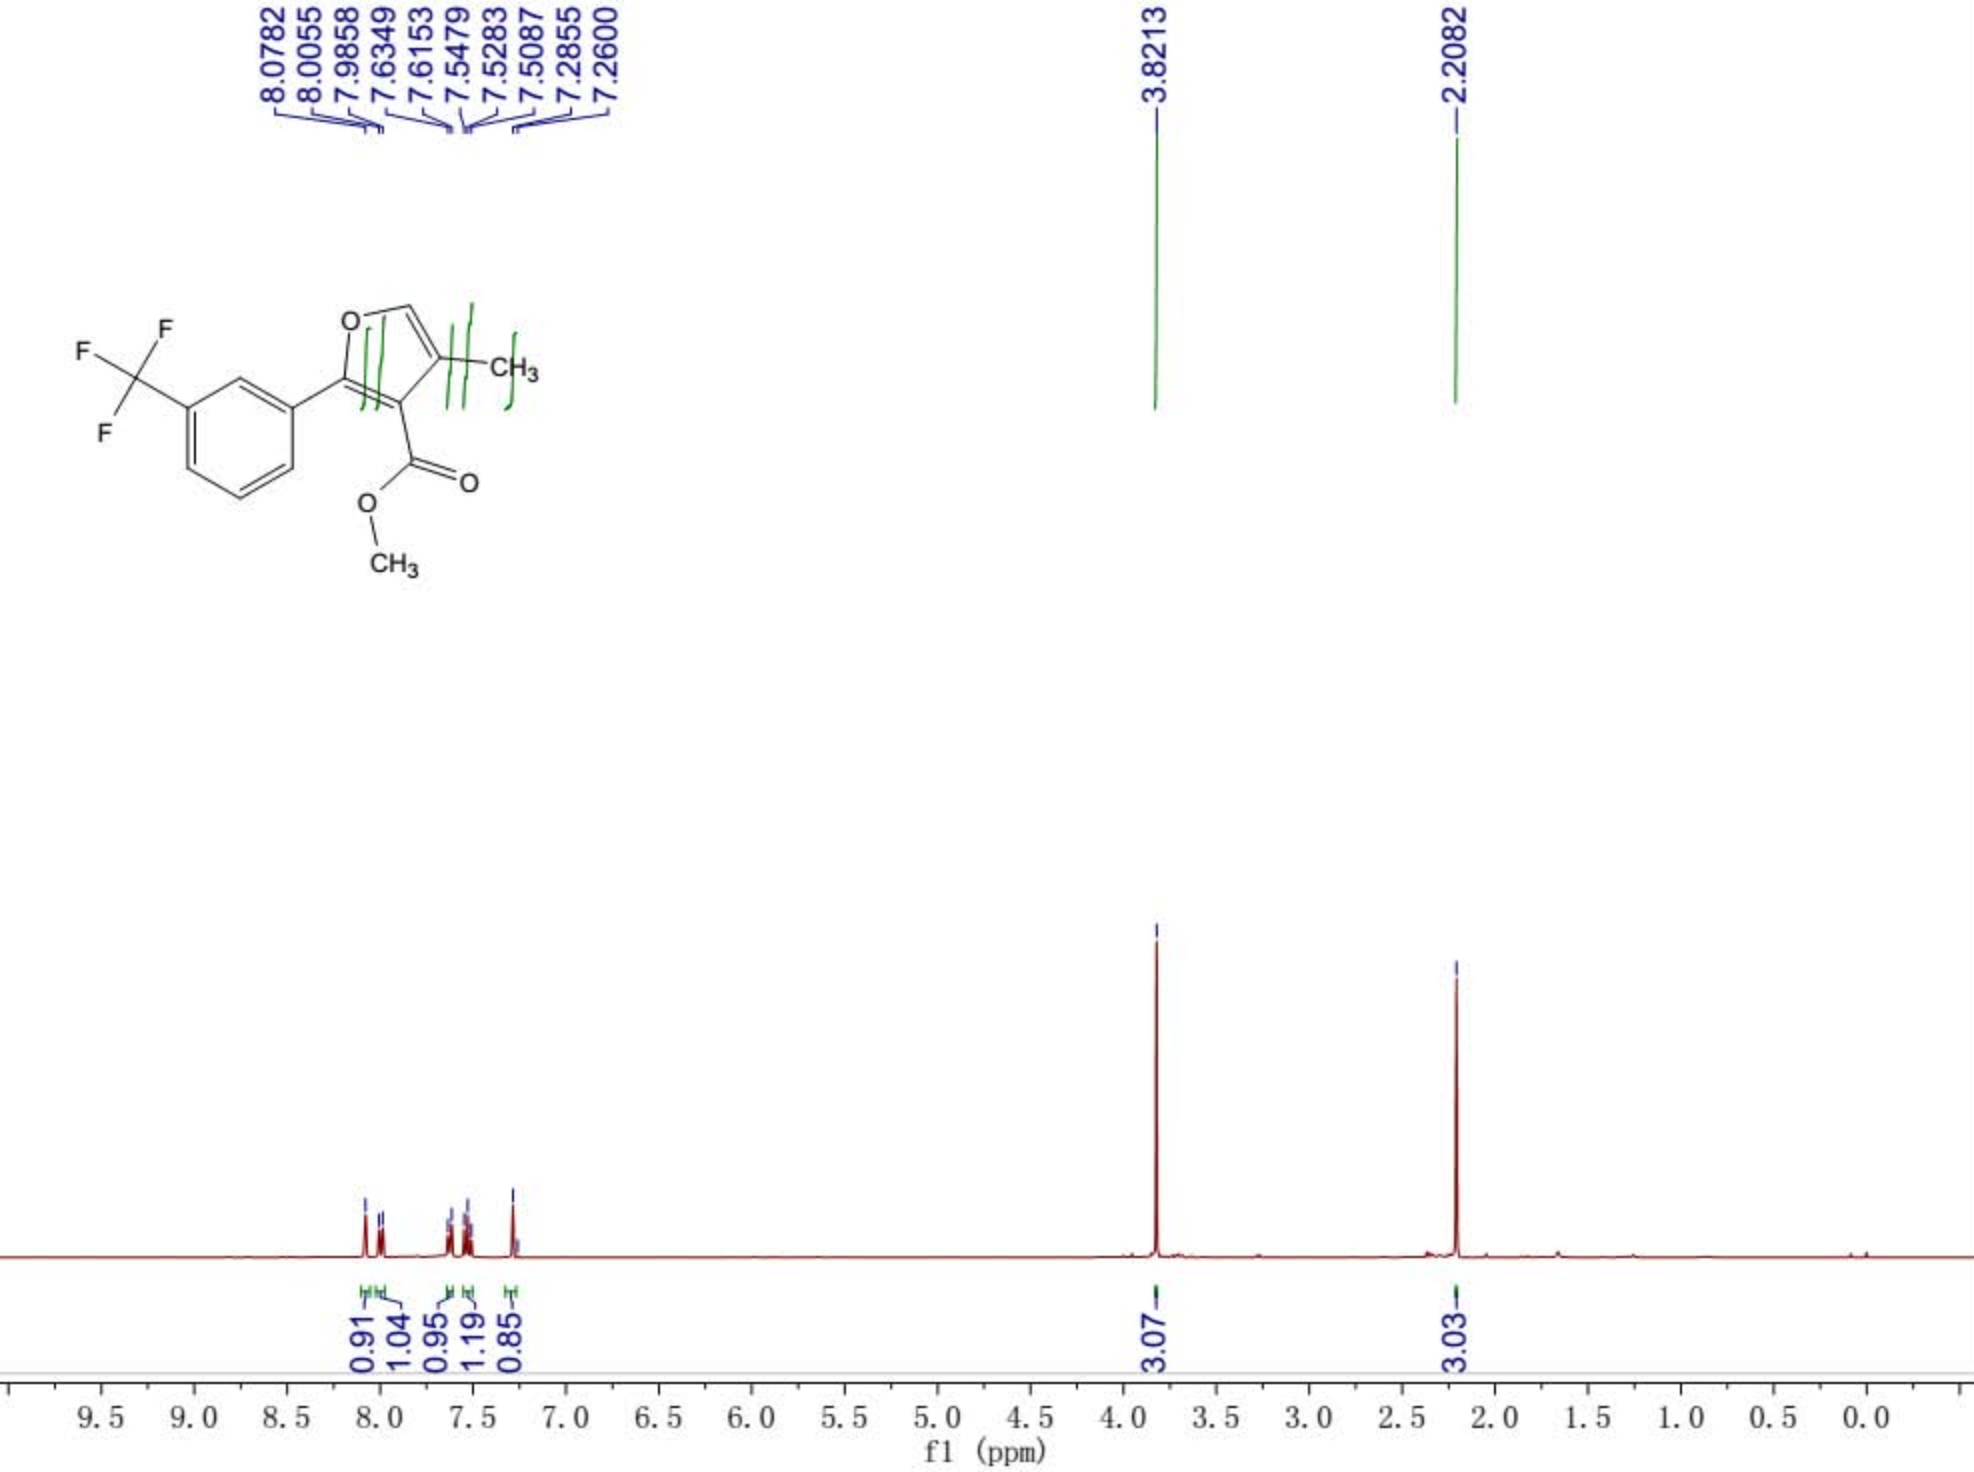

NO: 201501

—164.6538  
—156.2160  
—139.9561  
131.6100  
131.5983  
131.1583  
130.8057  
130.4827  
128.6419  
125.6738  
125.6365  
125.5994  
125.5621  
125.4858  
125.4455  
125.4064  
125.3667  
123.0343  
115.0841  
77.4781  
77.1605  
76.8424  
—51.5329  
—10.2277

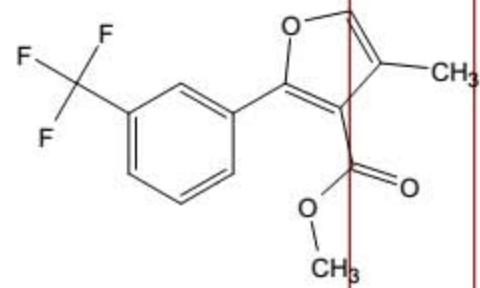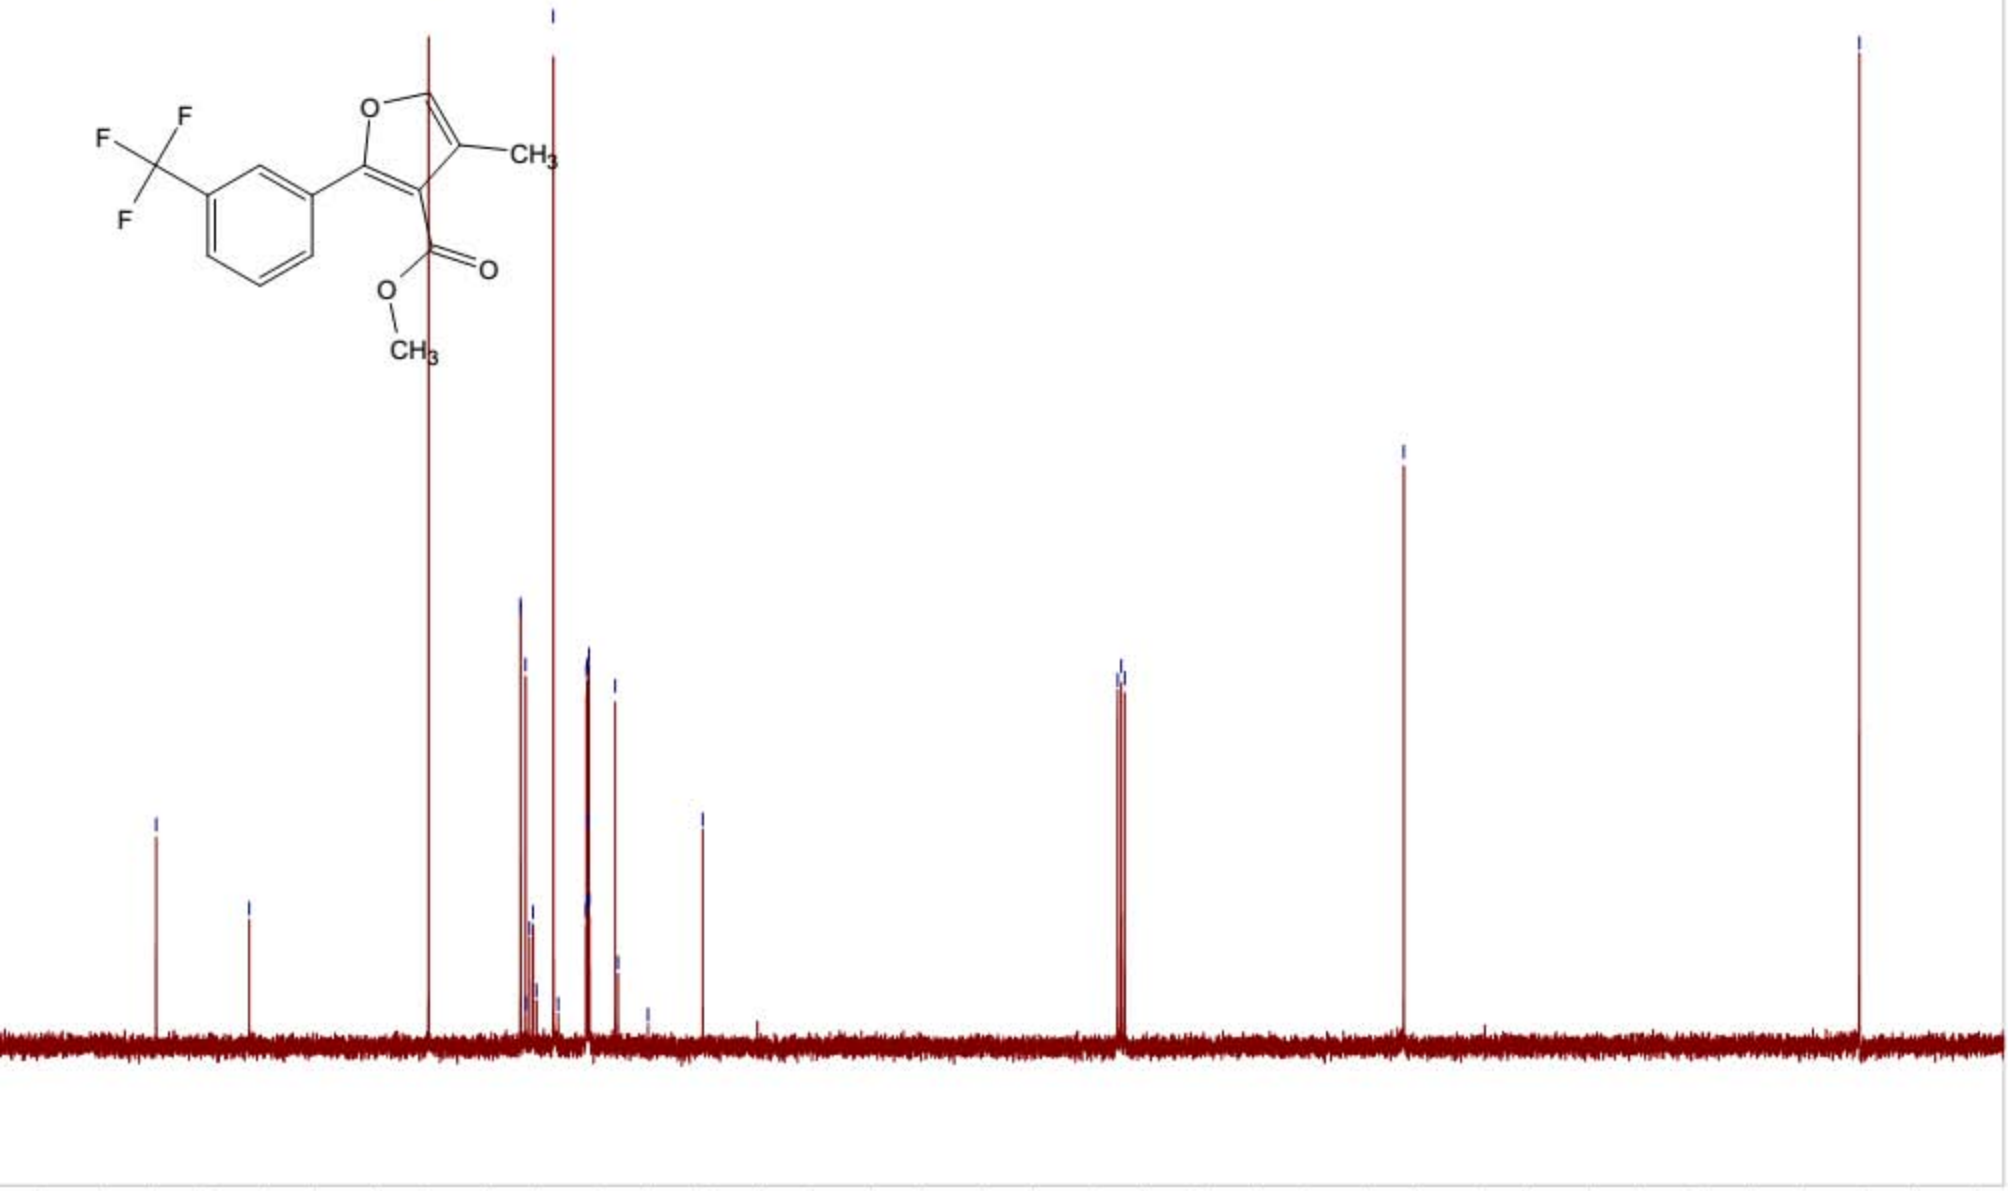

f1 (ppm)



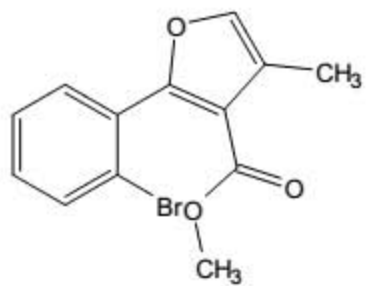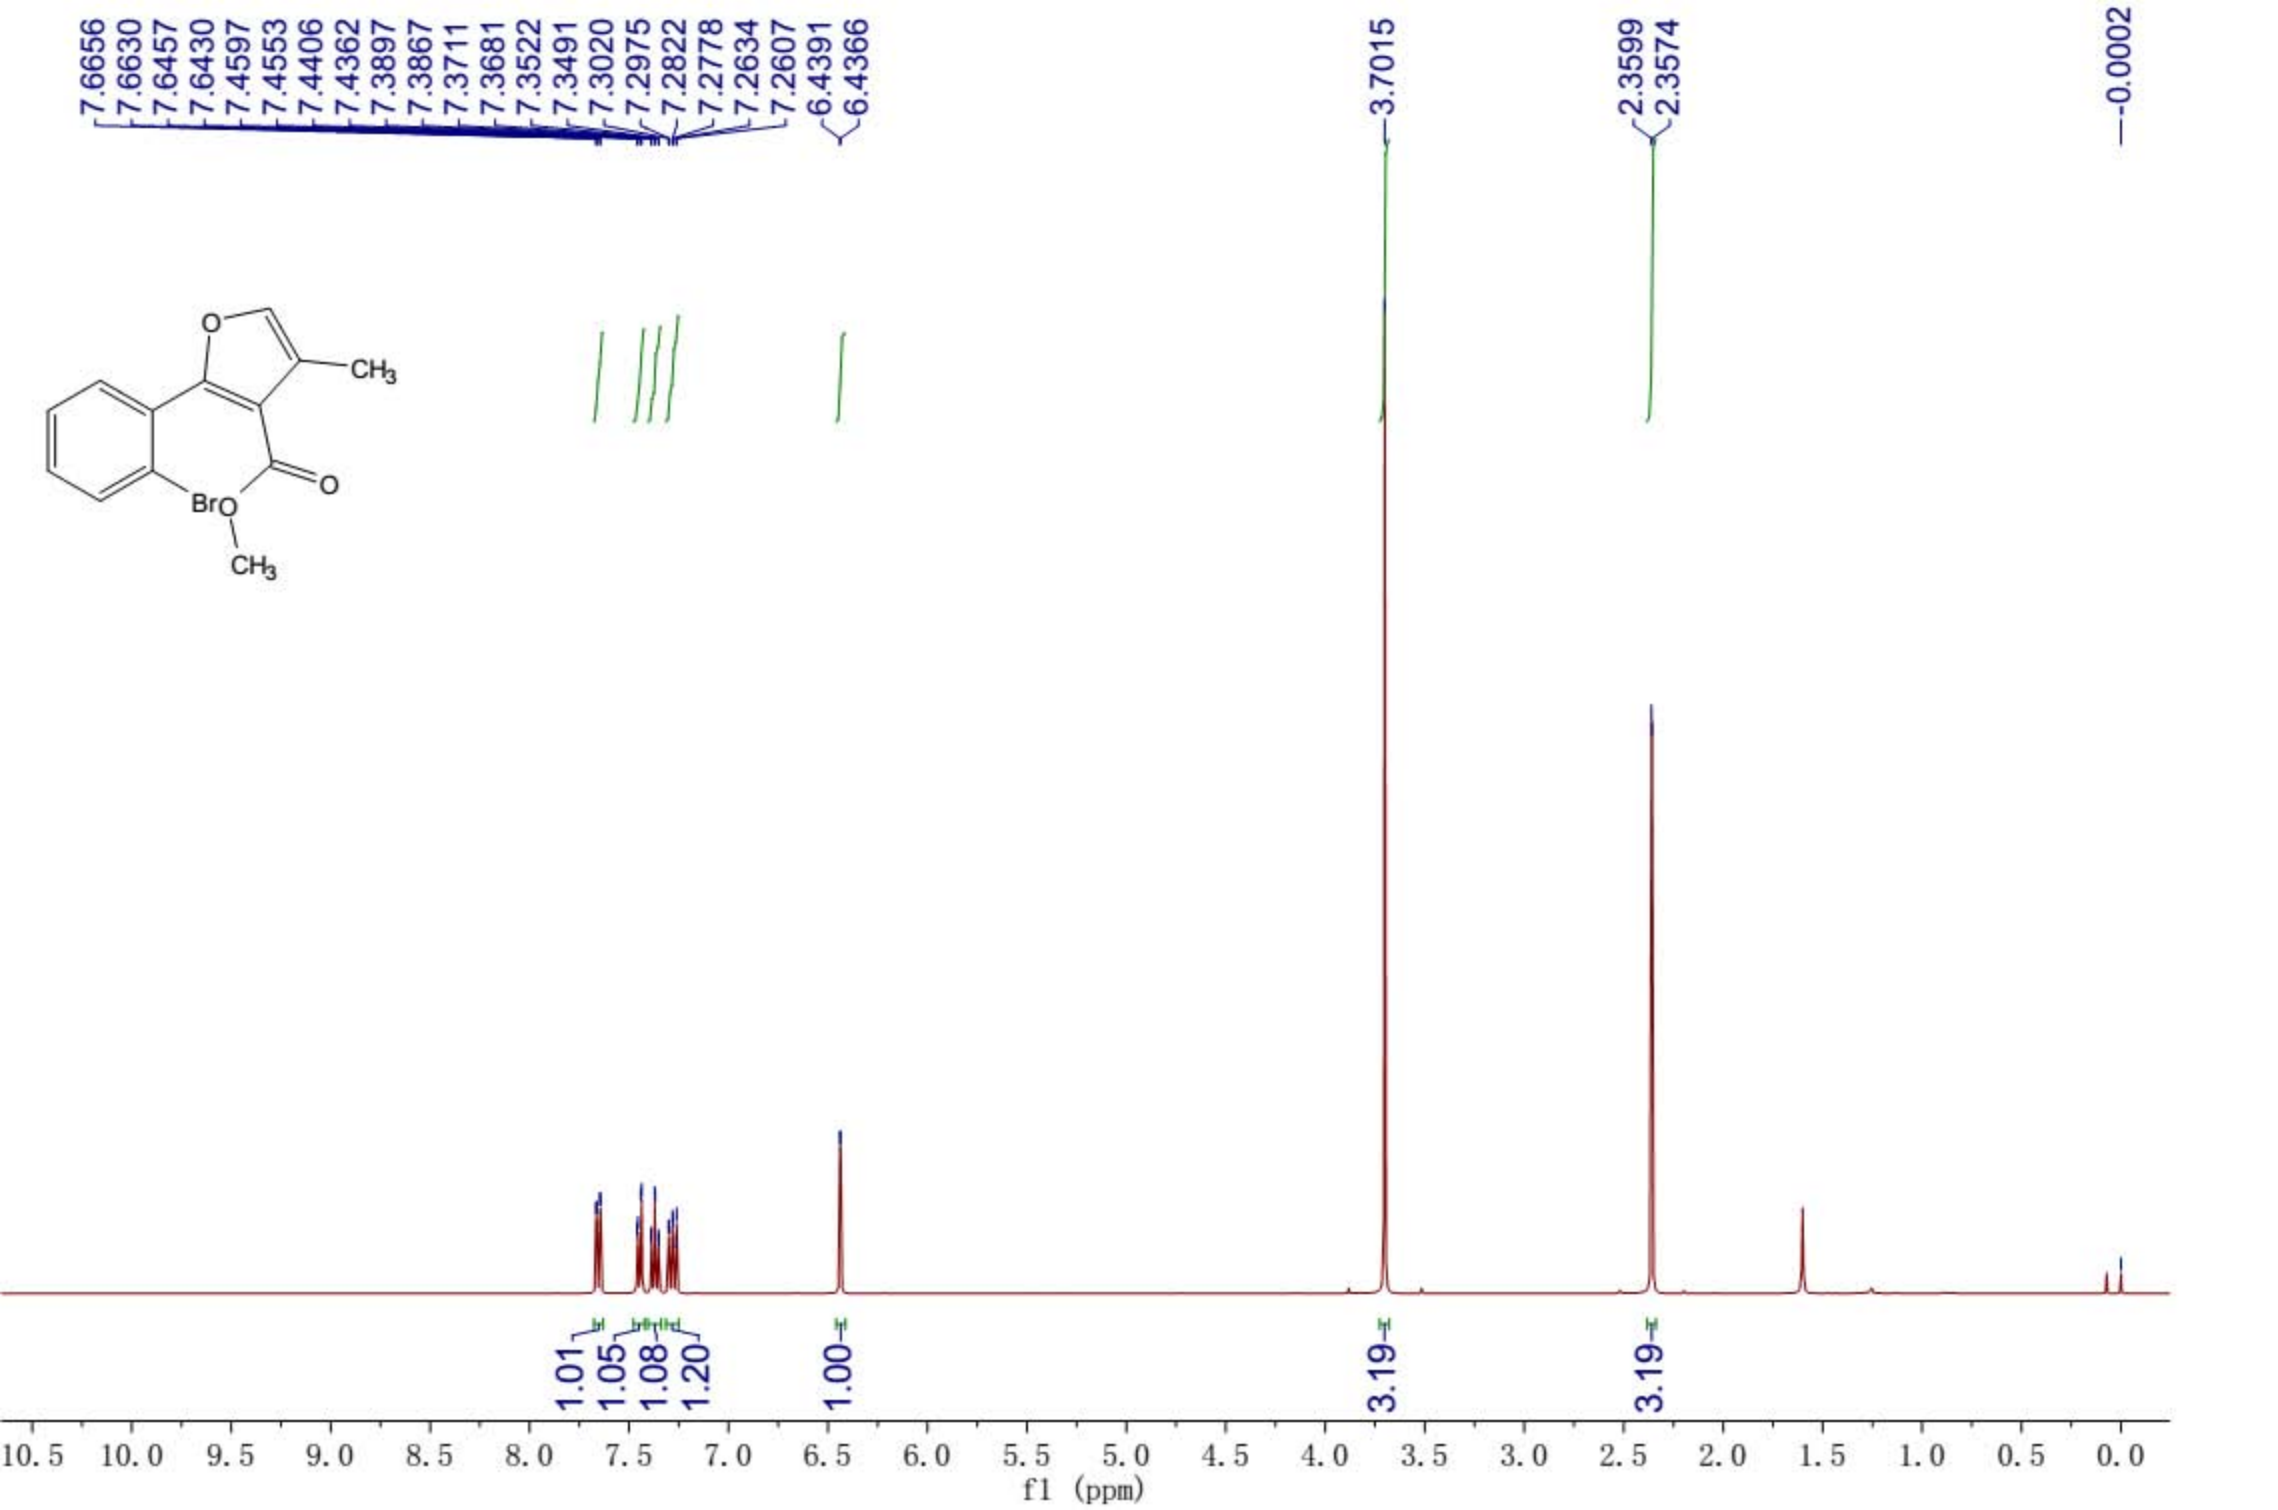

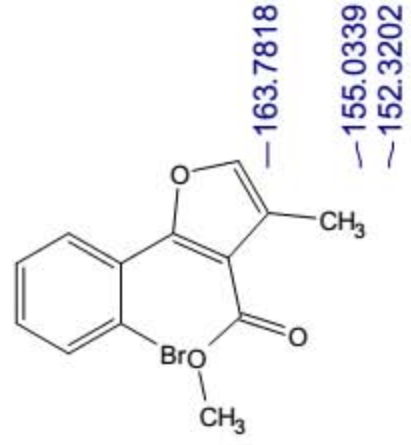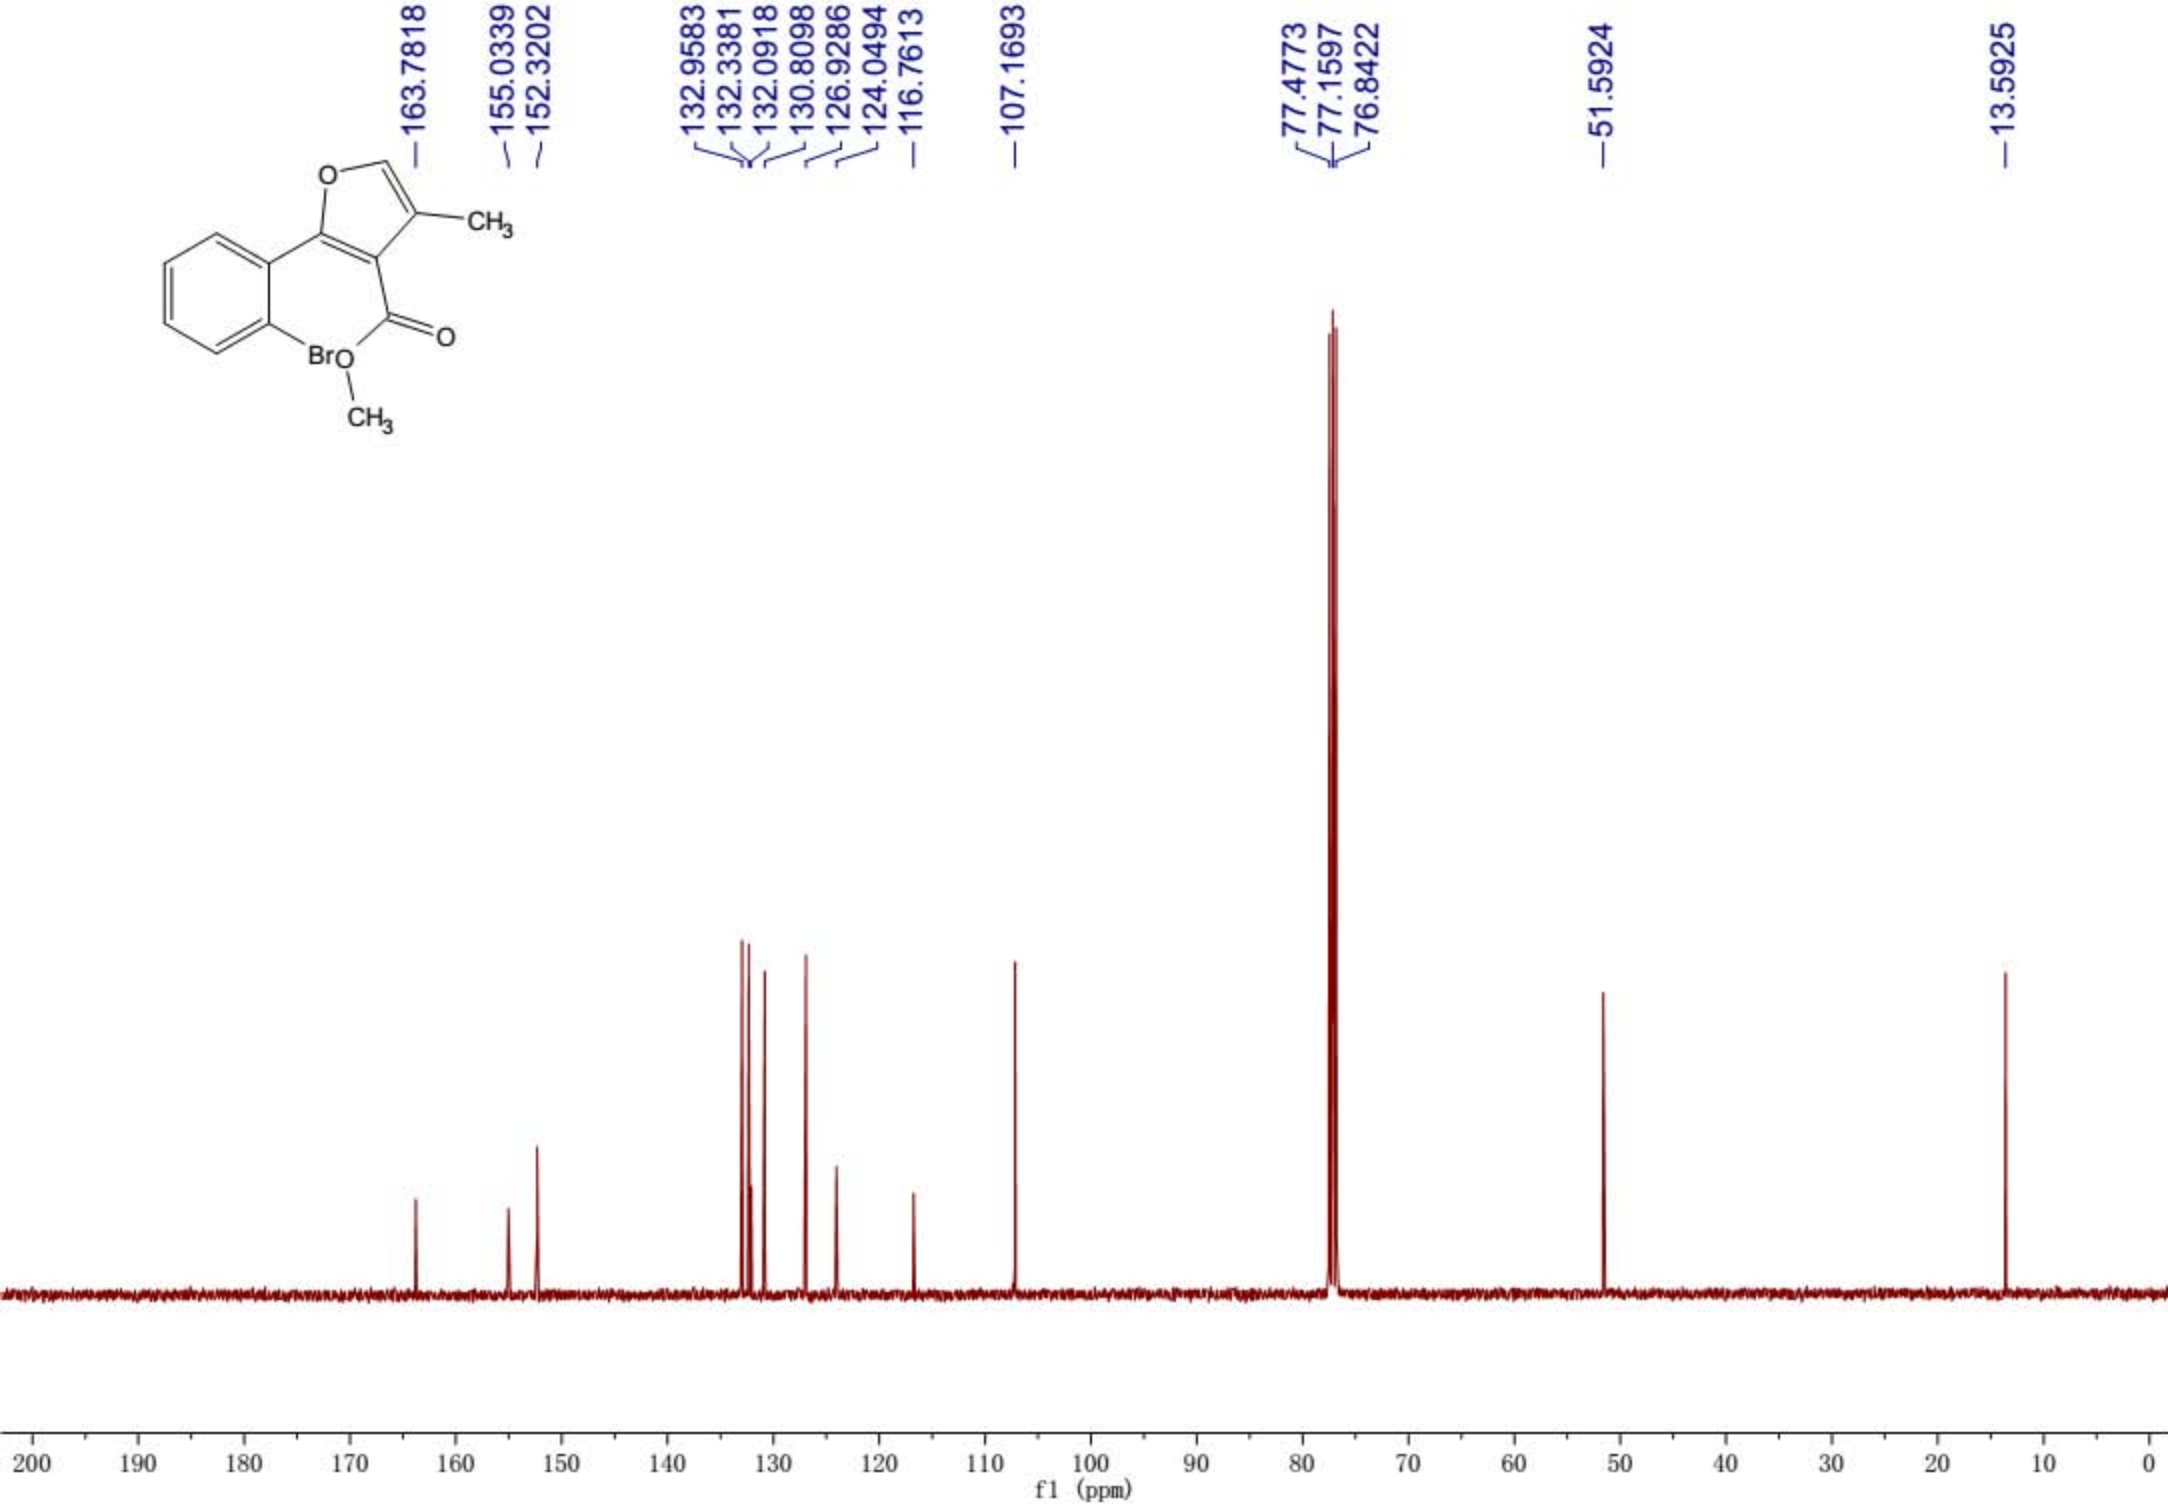

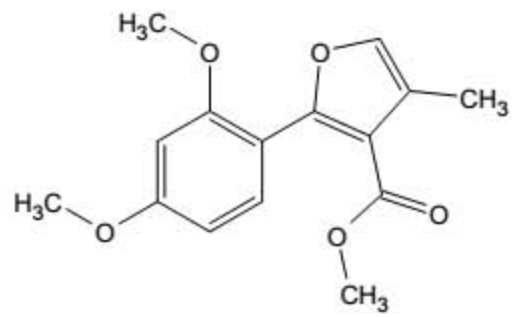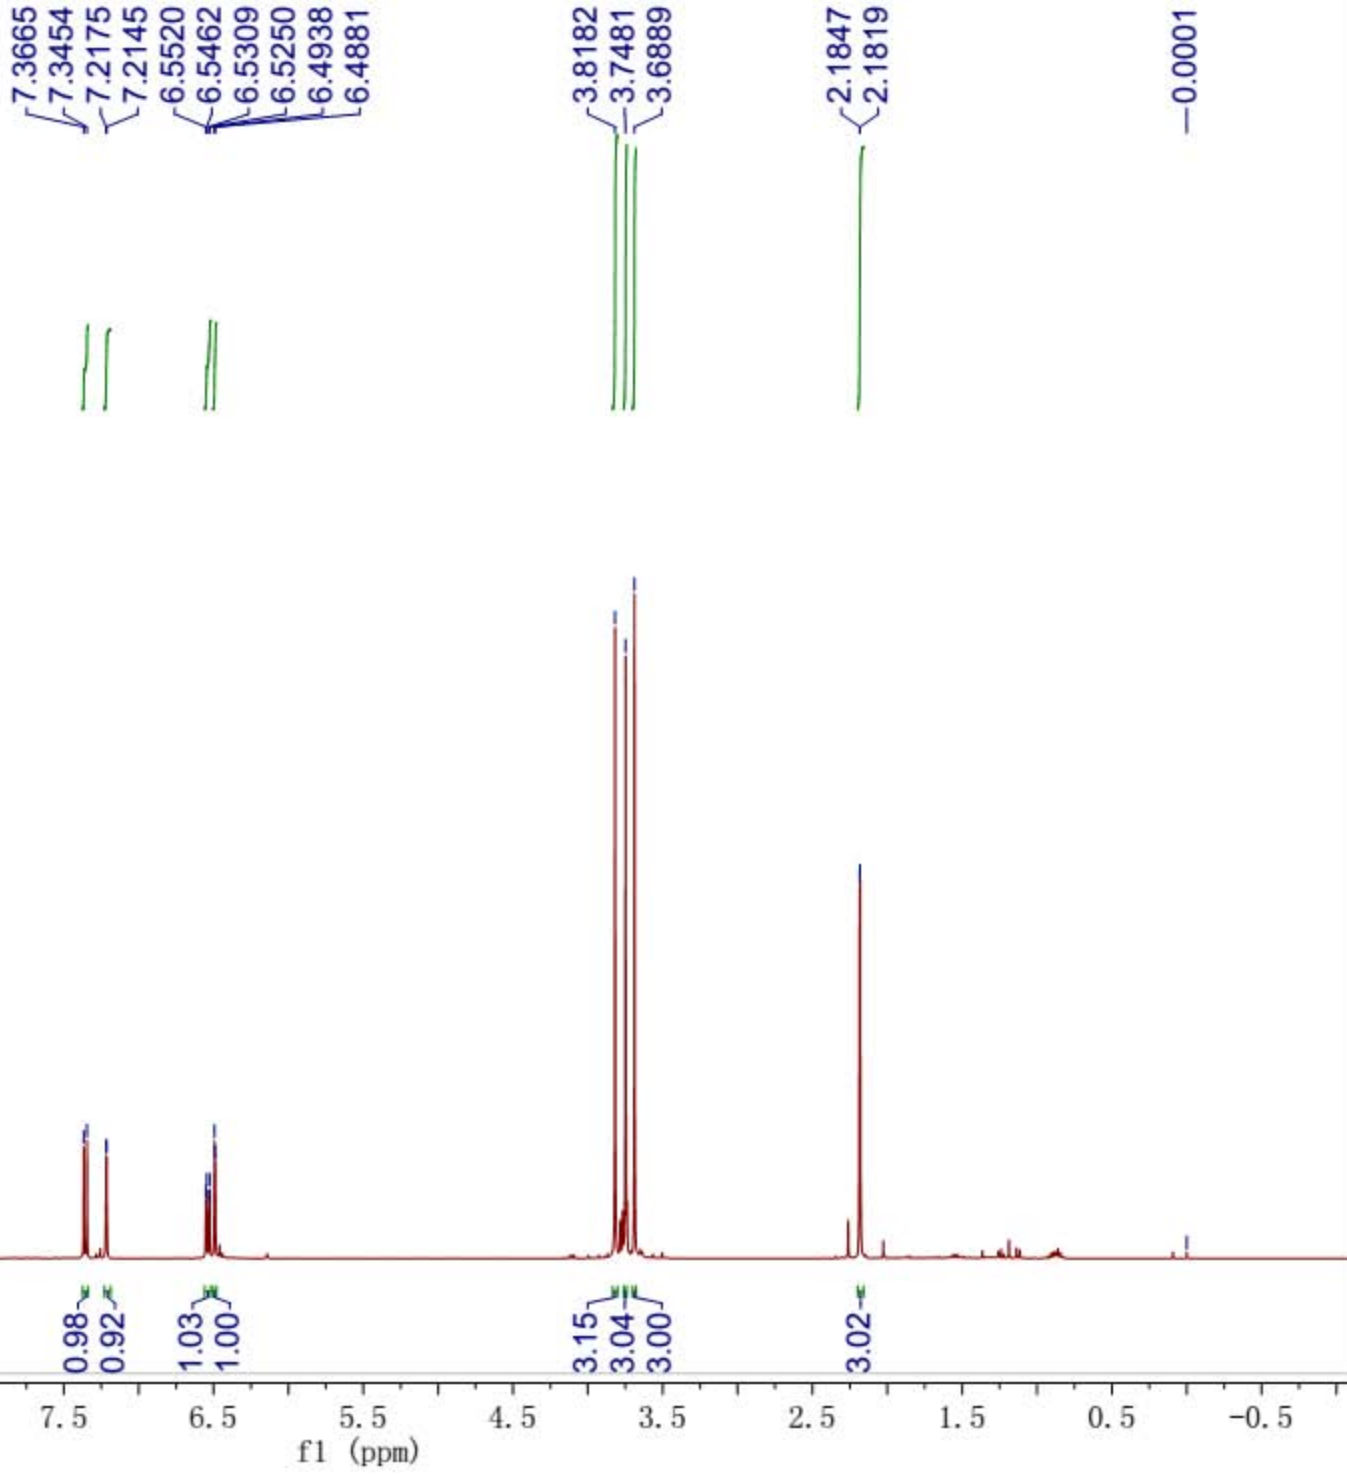

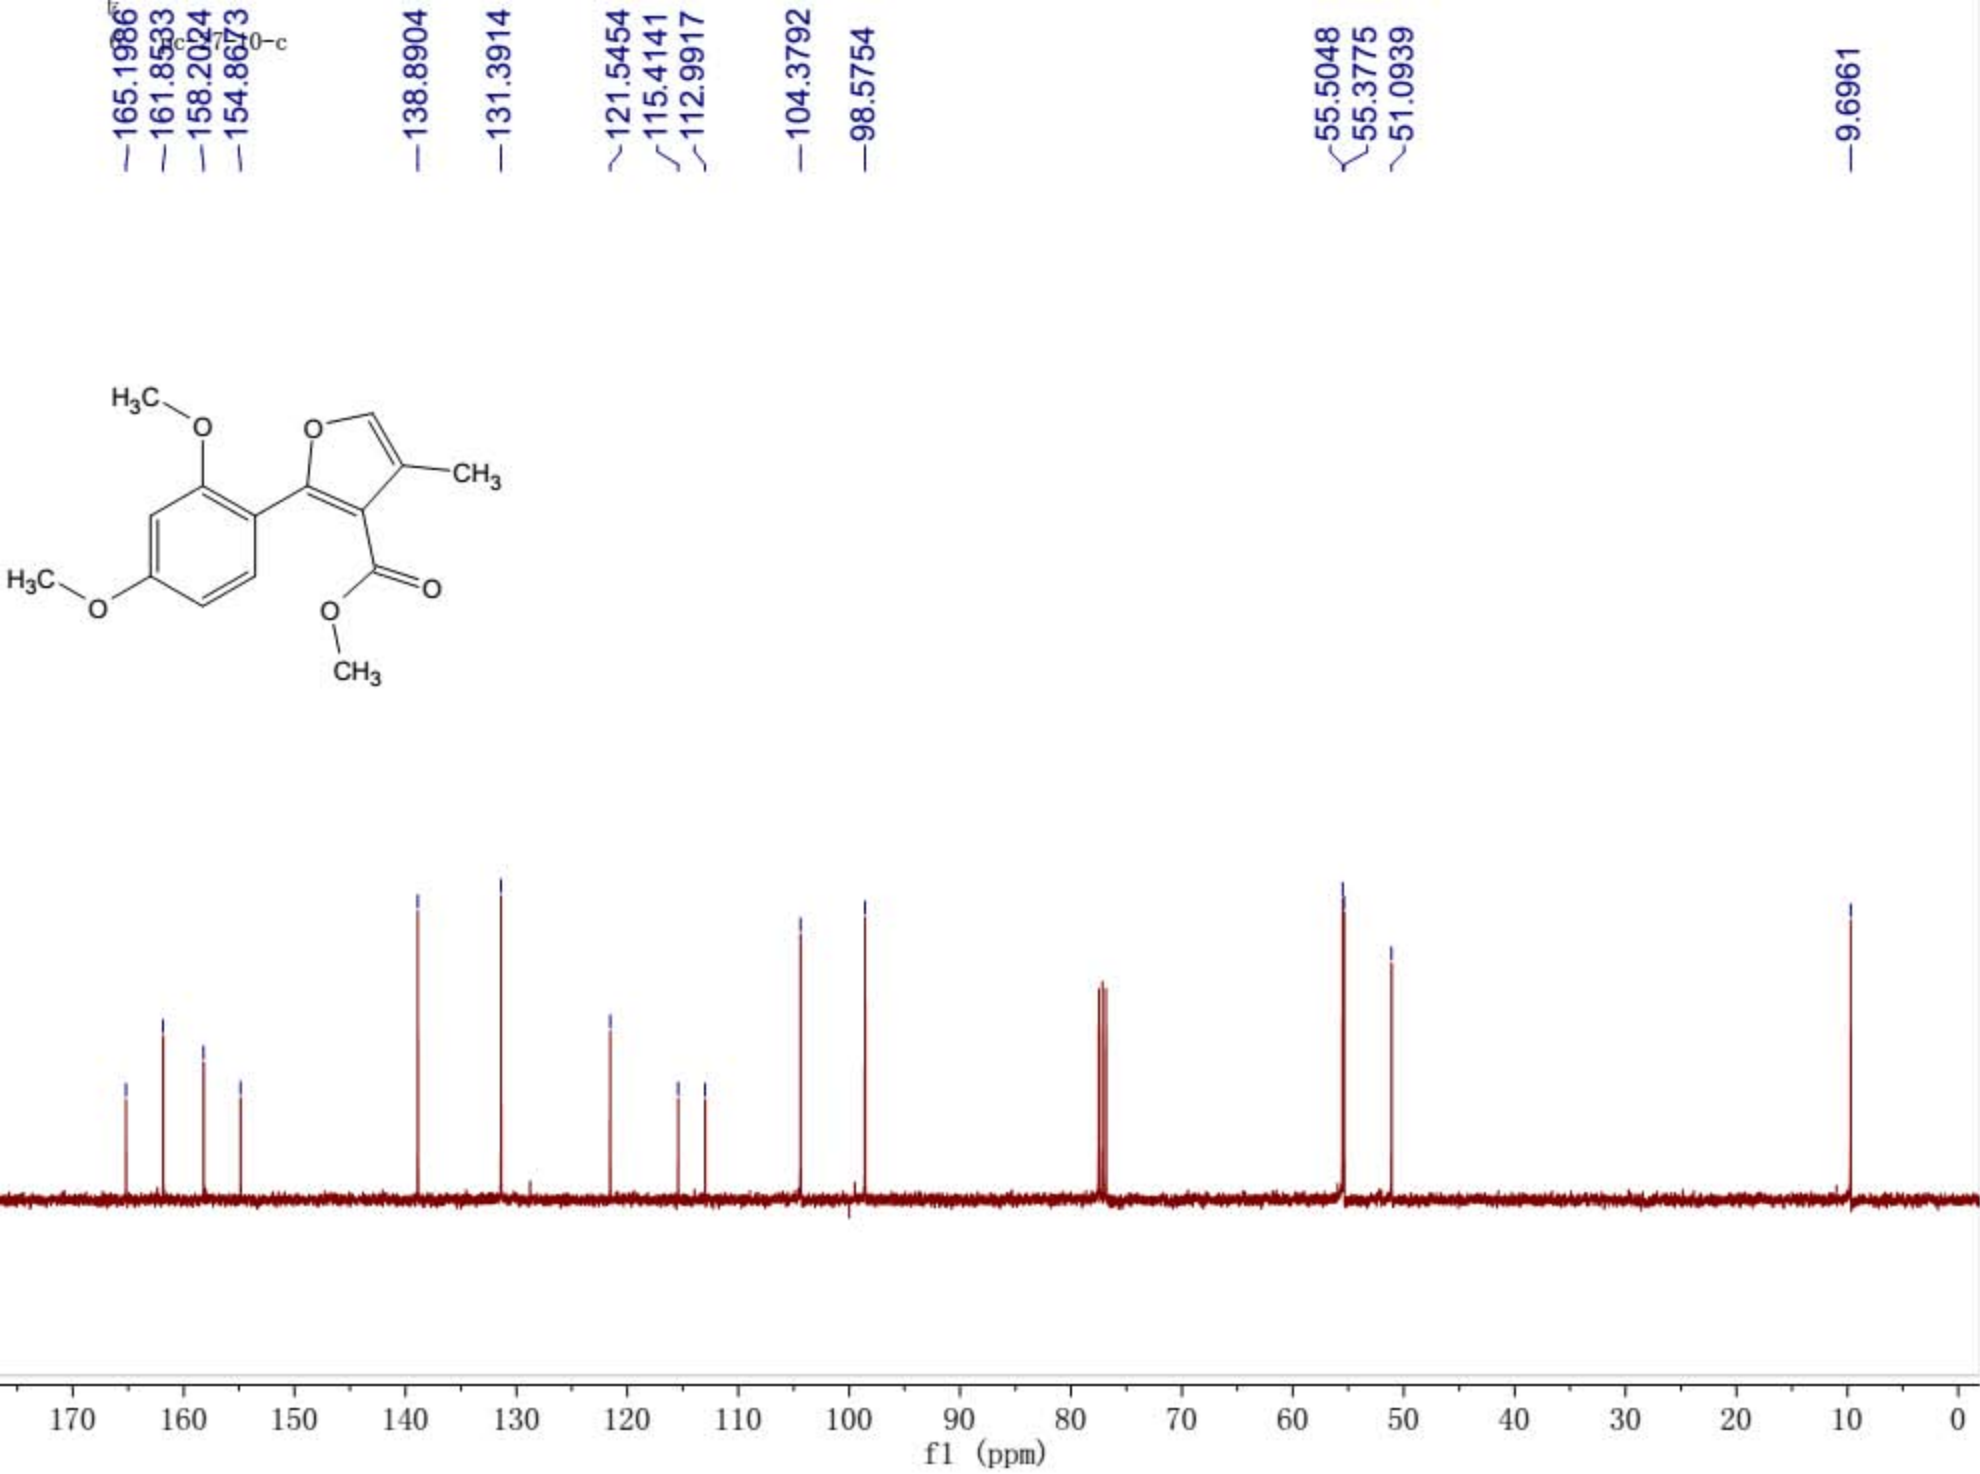

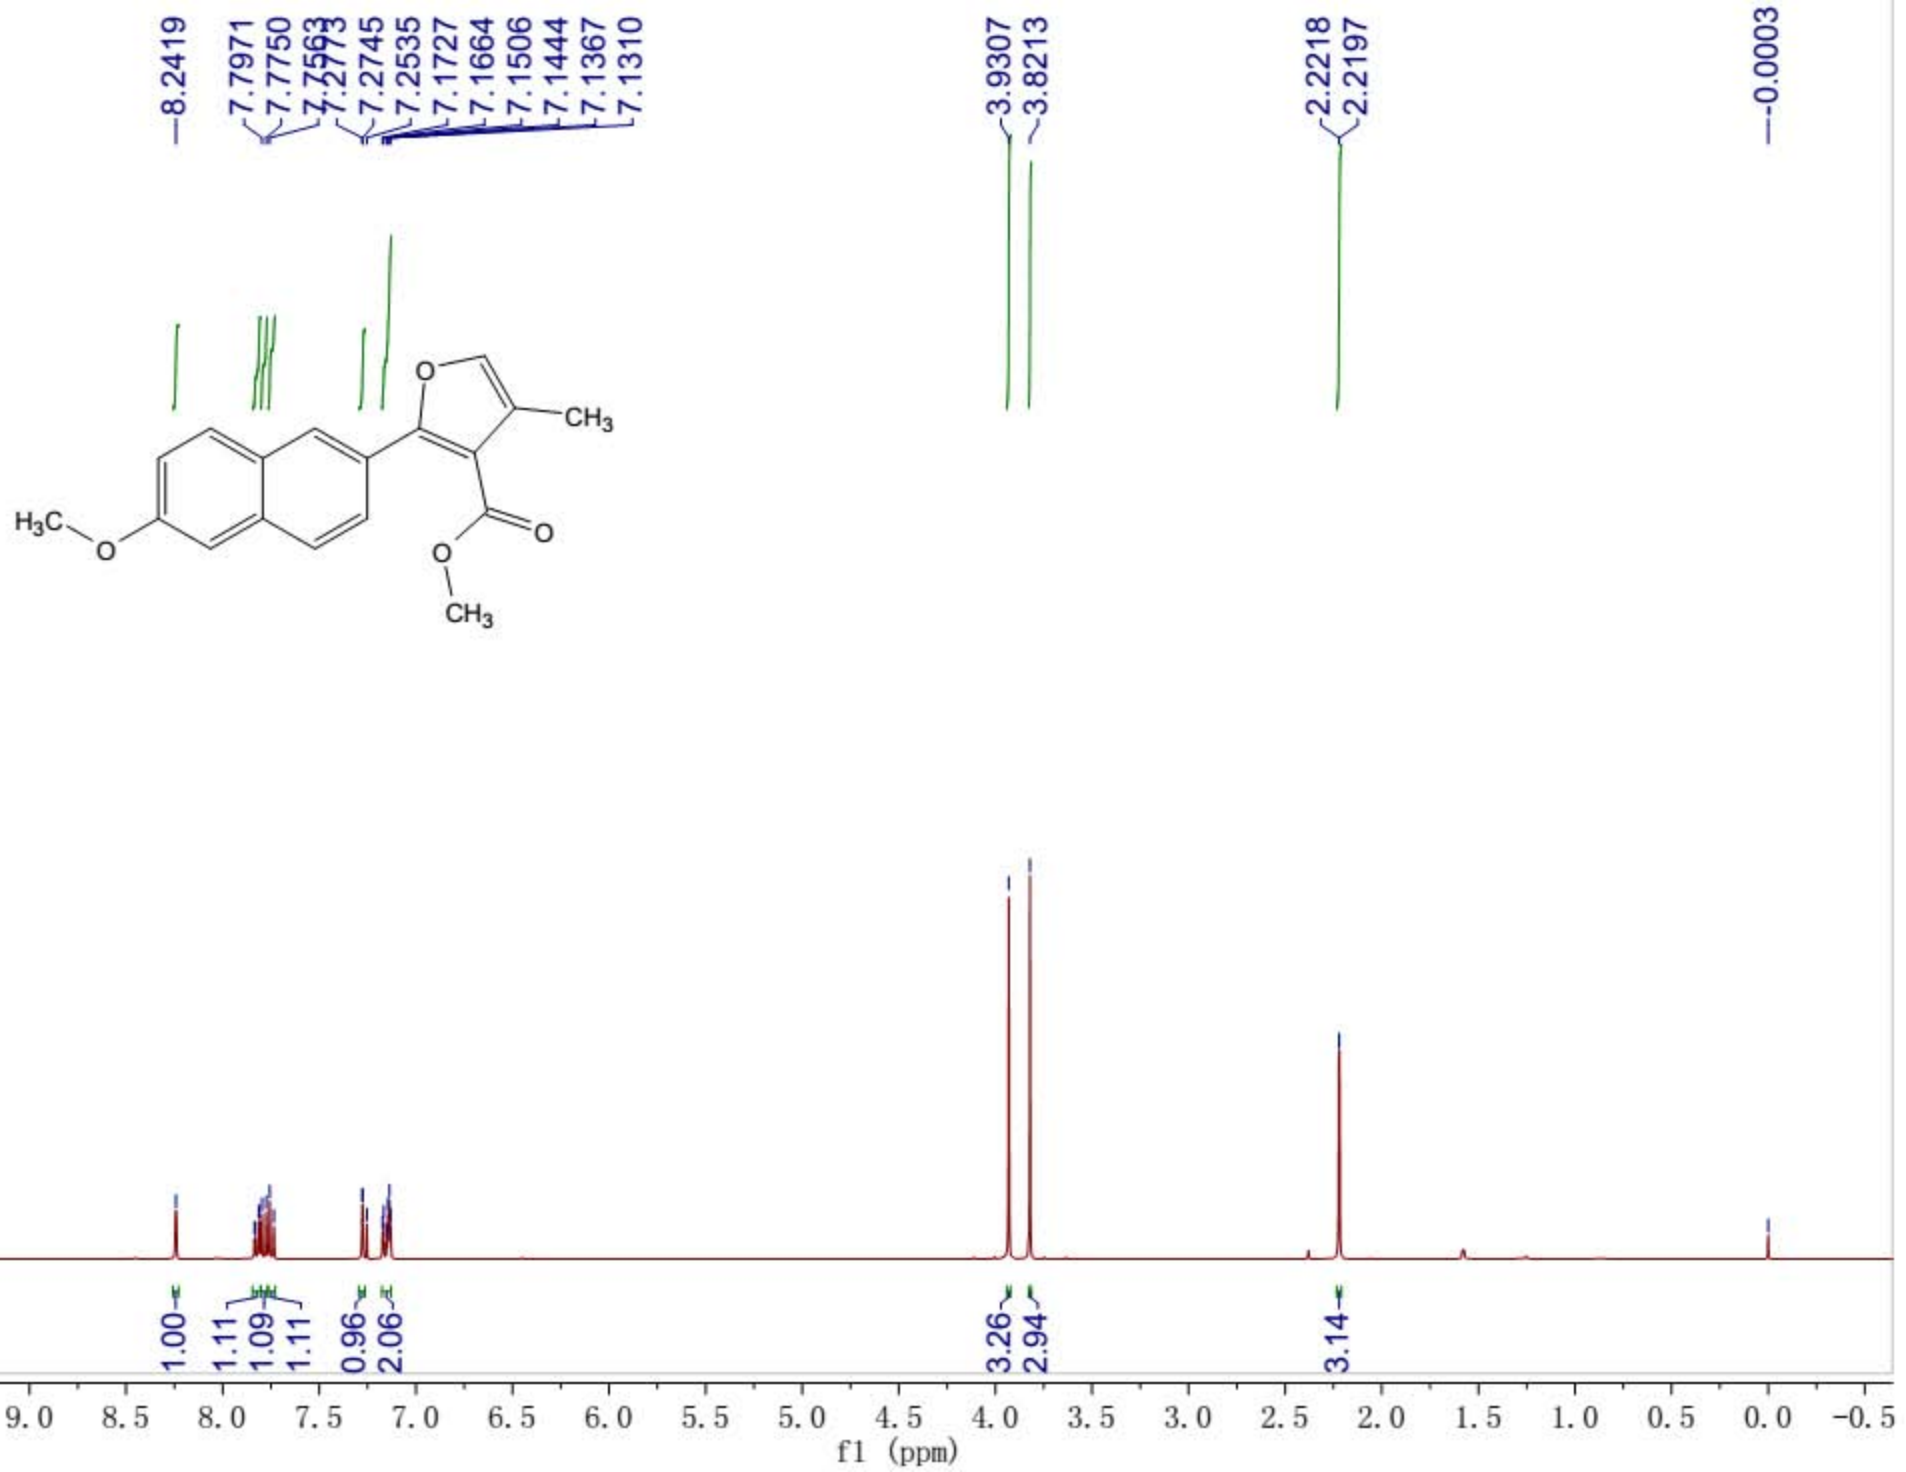

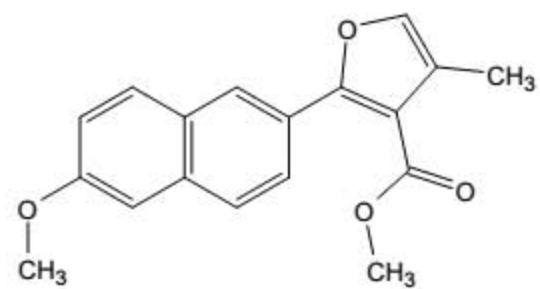

165.18112  
158.59008  
158.48338  
139.2007  
134.8613  
130.3408  
128.4410  
128.0528  
126.4336  
126.3532  
125.7446  
122.7231  
119.3093  
113.8392  
105.7320

77.4778  
77.1597  
76.8420

55.4829  
51.4389

10.3973

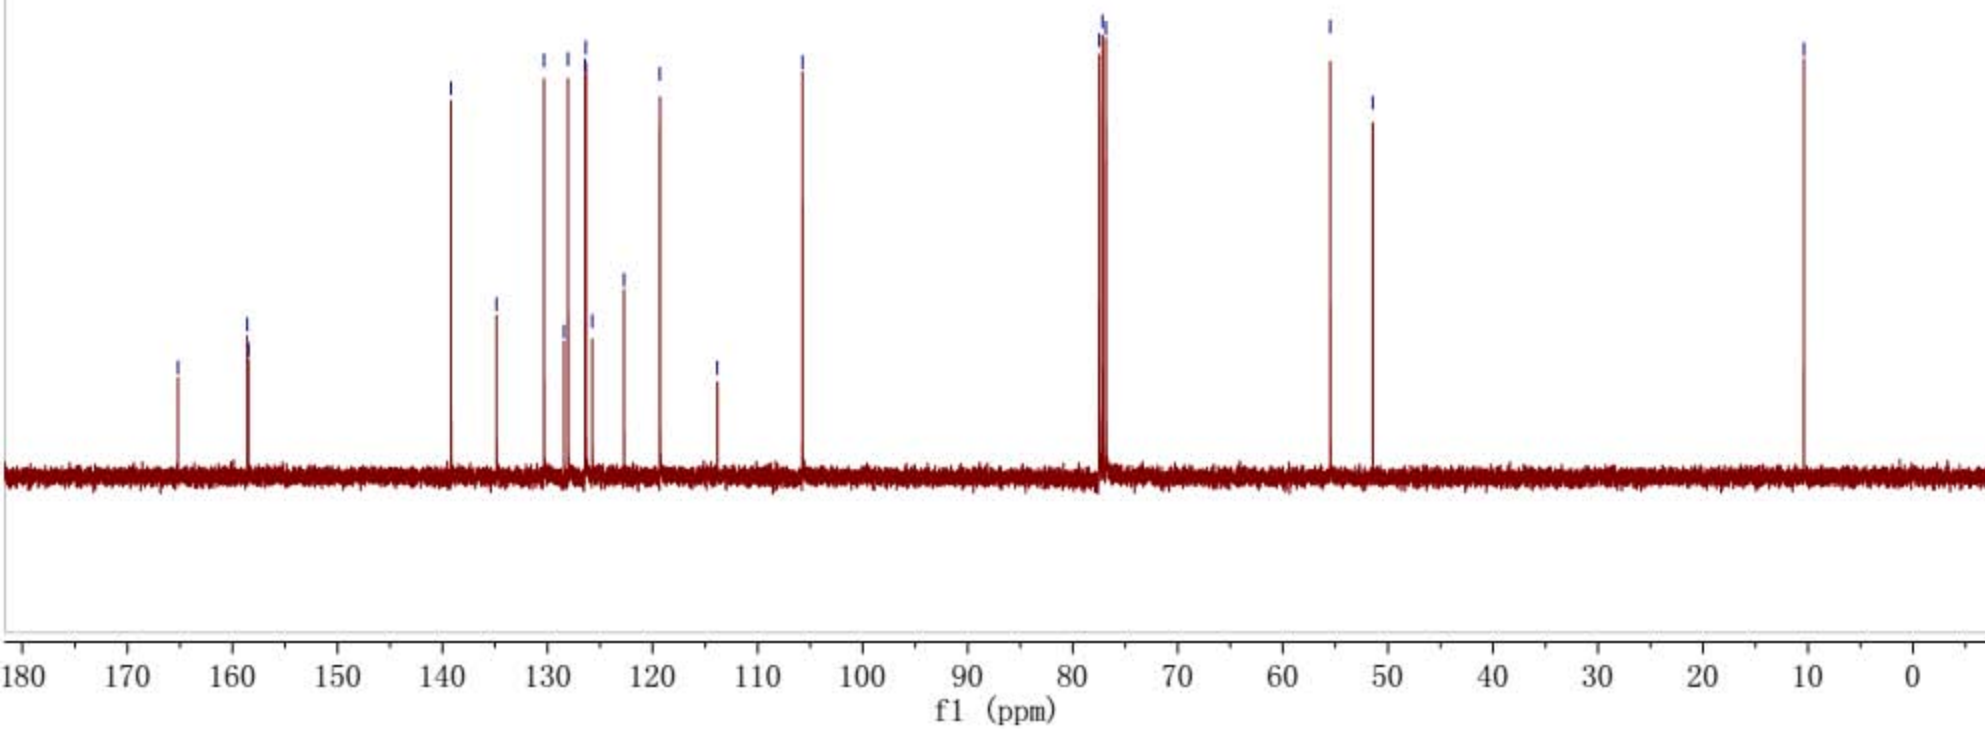

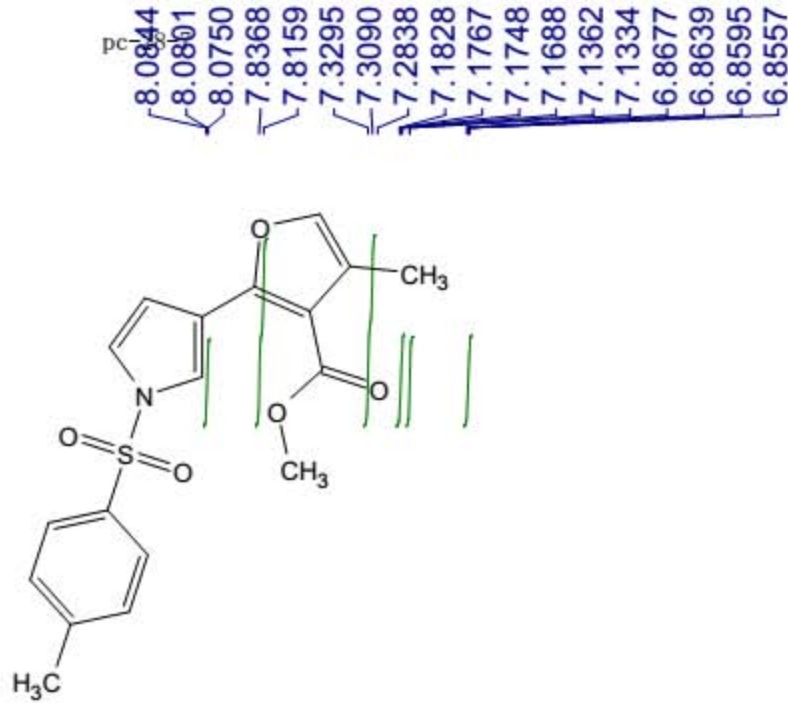

8.0844  
8.0801  
8.0750  
7.8368  
7.8159  
7.3295  
7.3090  
7.2838  
7.1828  
7.1767  
7.1748  
7.1688  
7.1362  
7.1334  
6.8677  
6.8639  
6.8595  
6.8557

3.8782  
2.4196  
2.1697

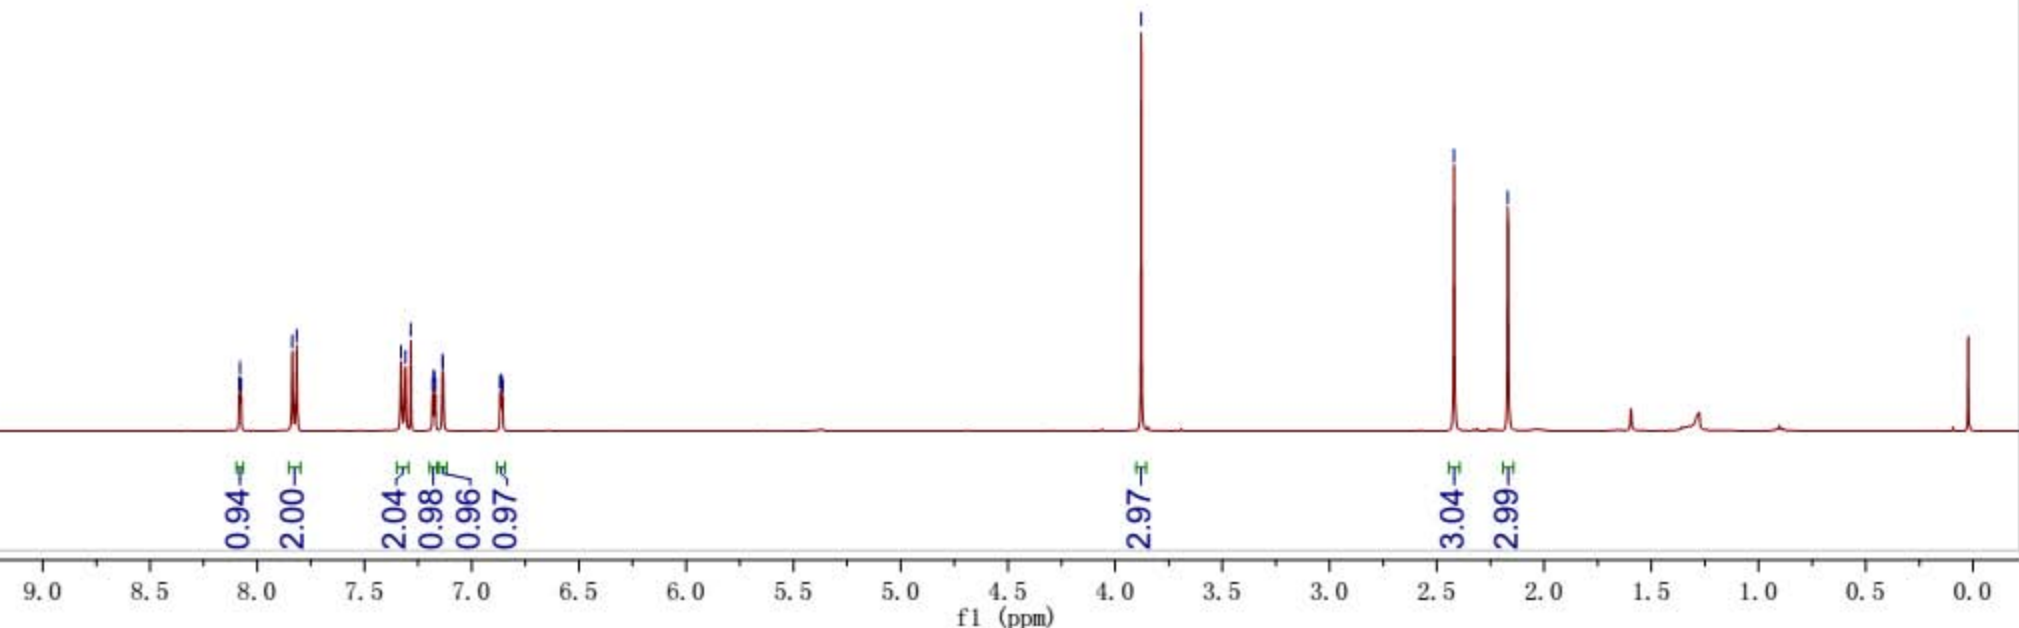

—164.878  
—153.699  
—145.398  
138.311  
135.913  
130.333  
127.204  
122.325  
121.135  
120.715  
119.292  
113.074  
112.879

77.477  
77.160  
76.842

—51.370

—21.778

—10.550

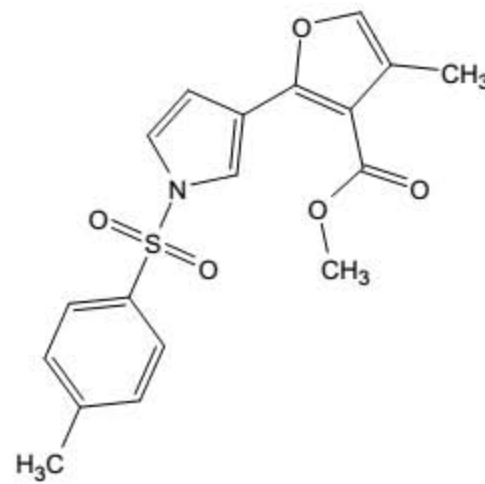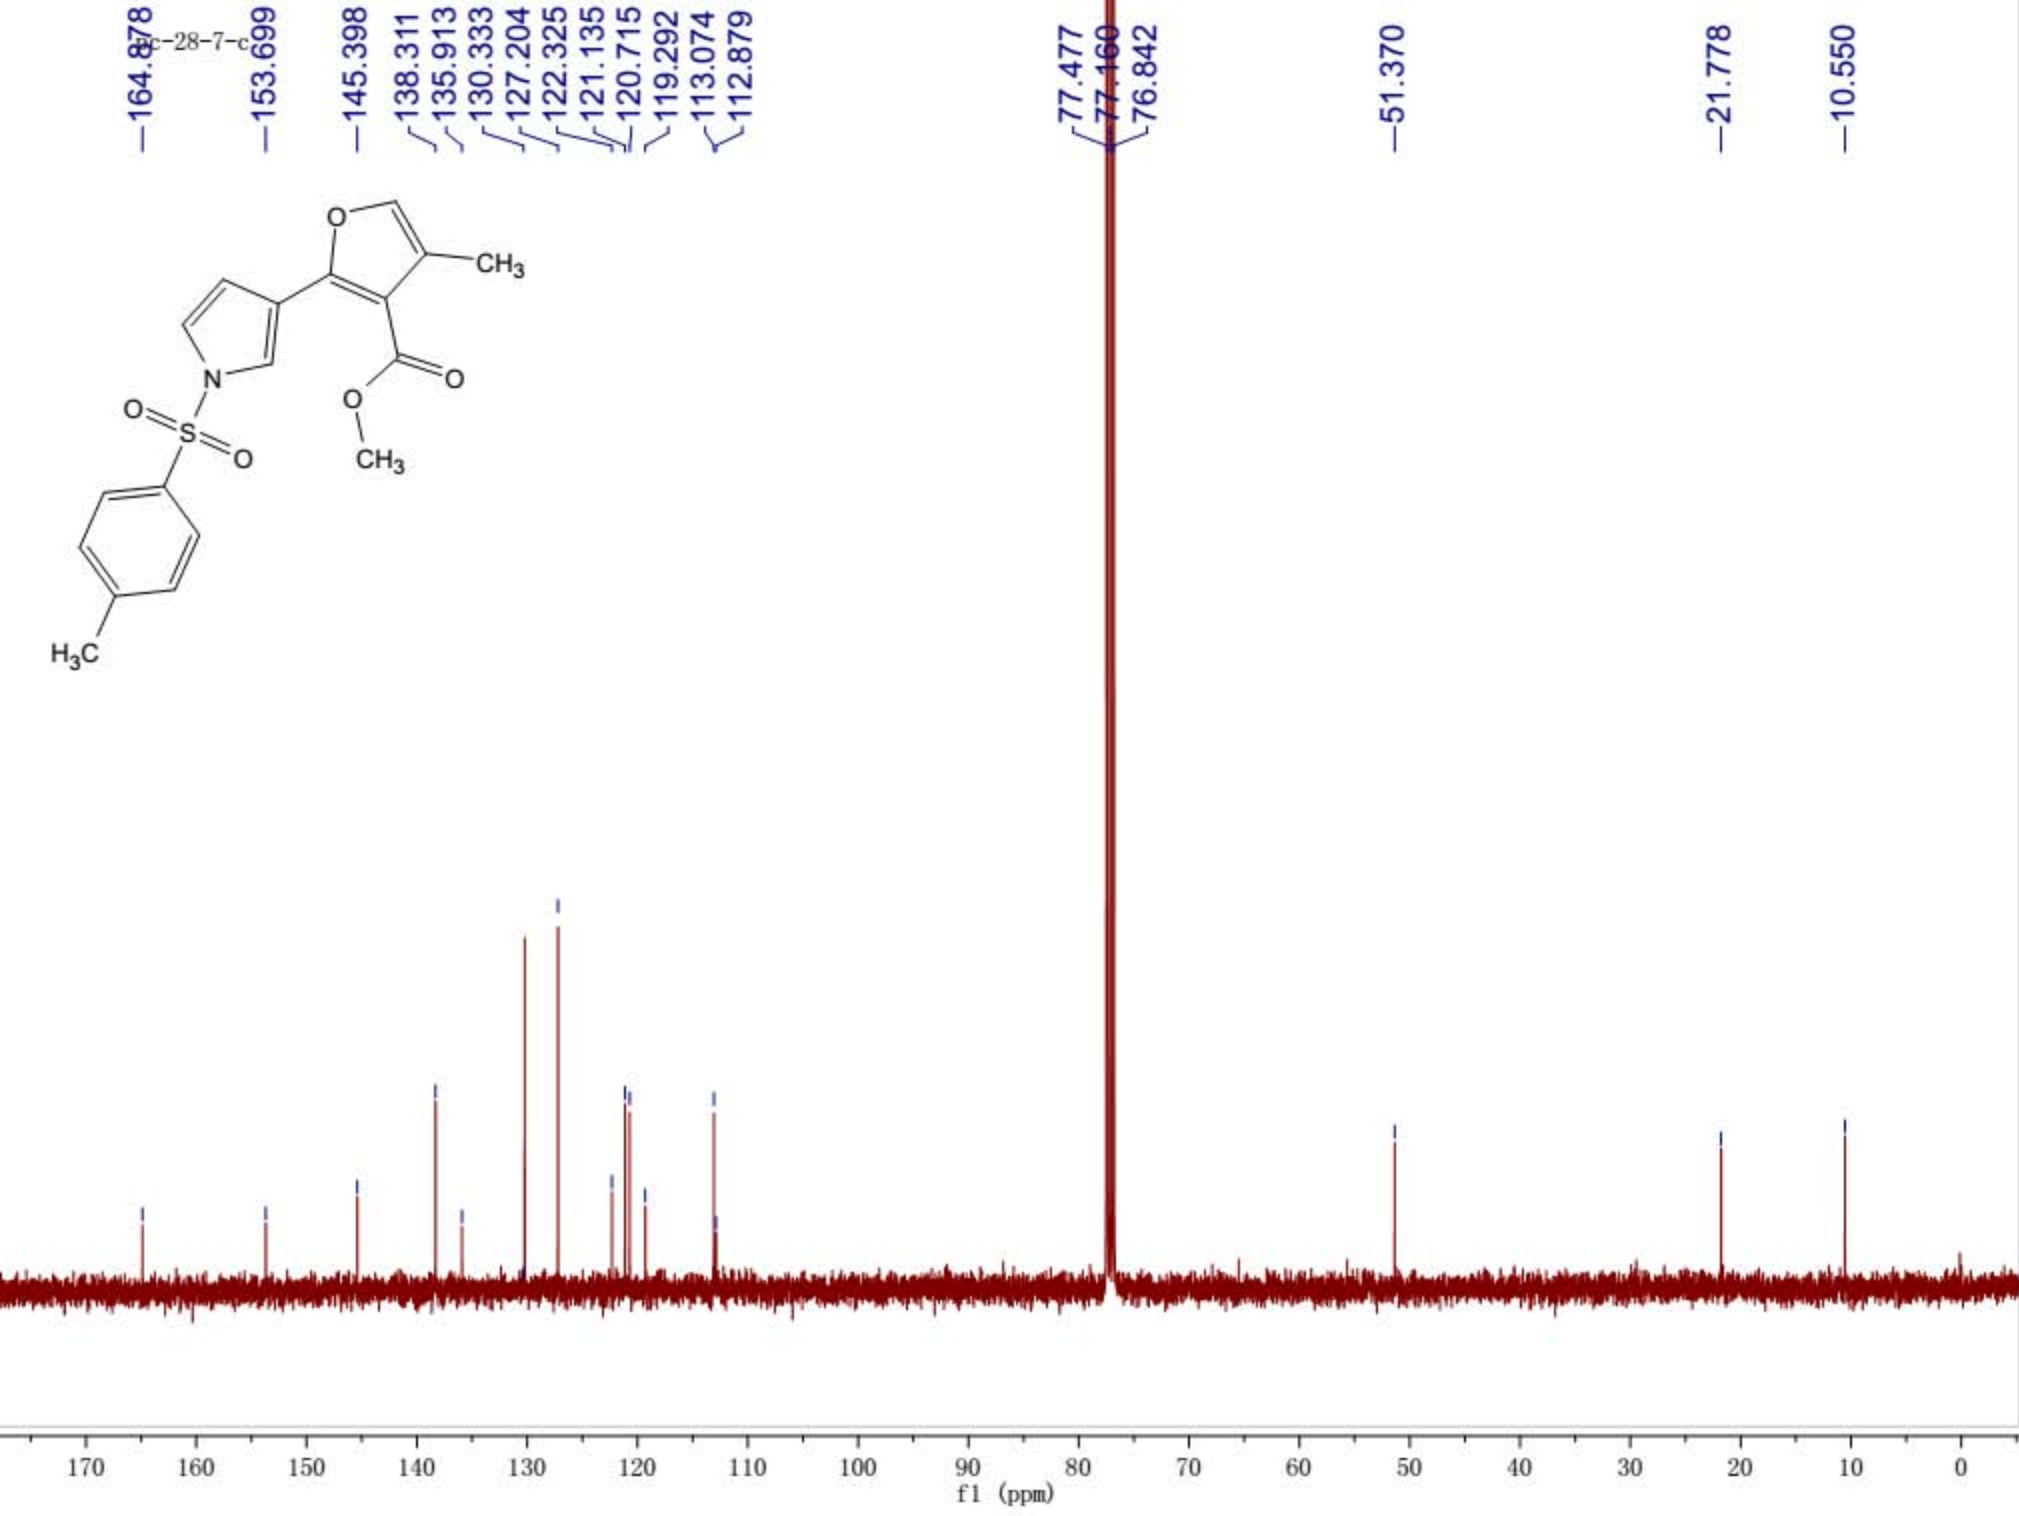



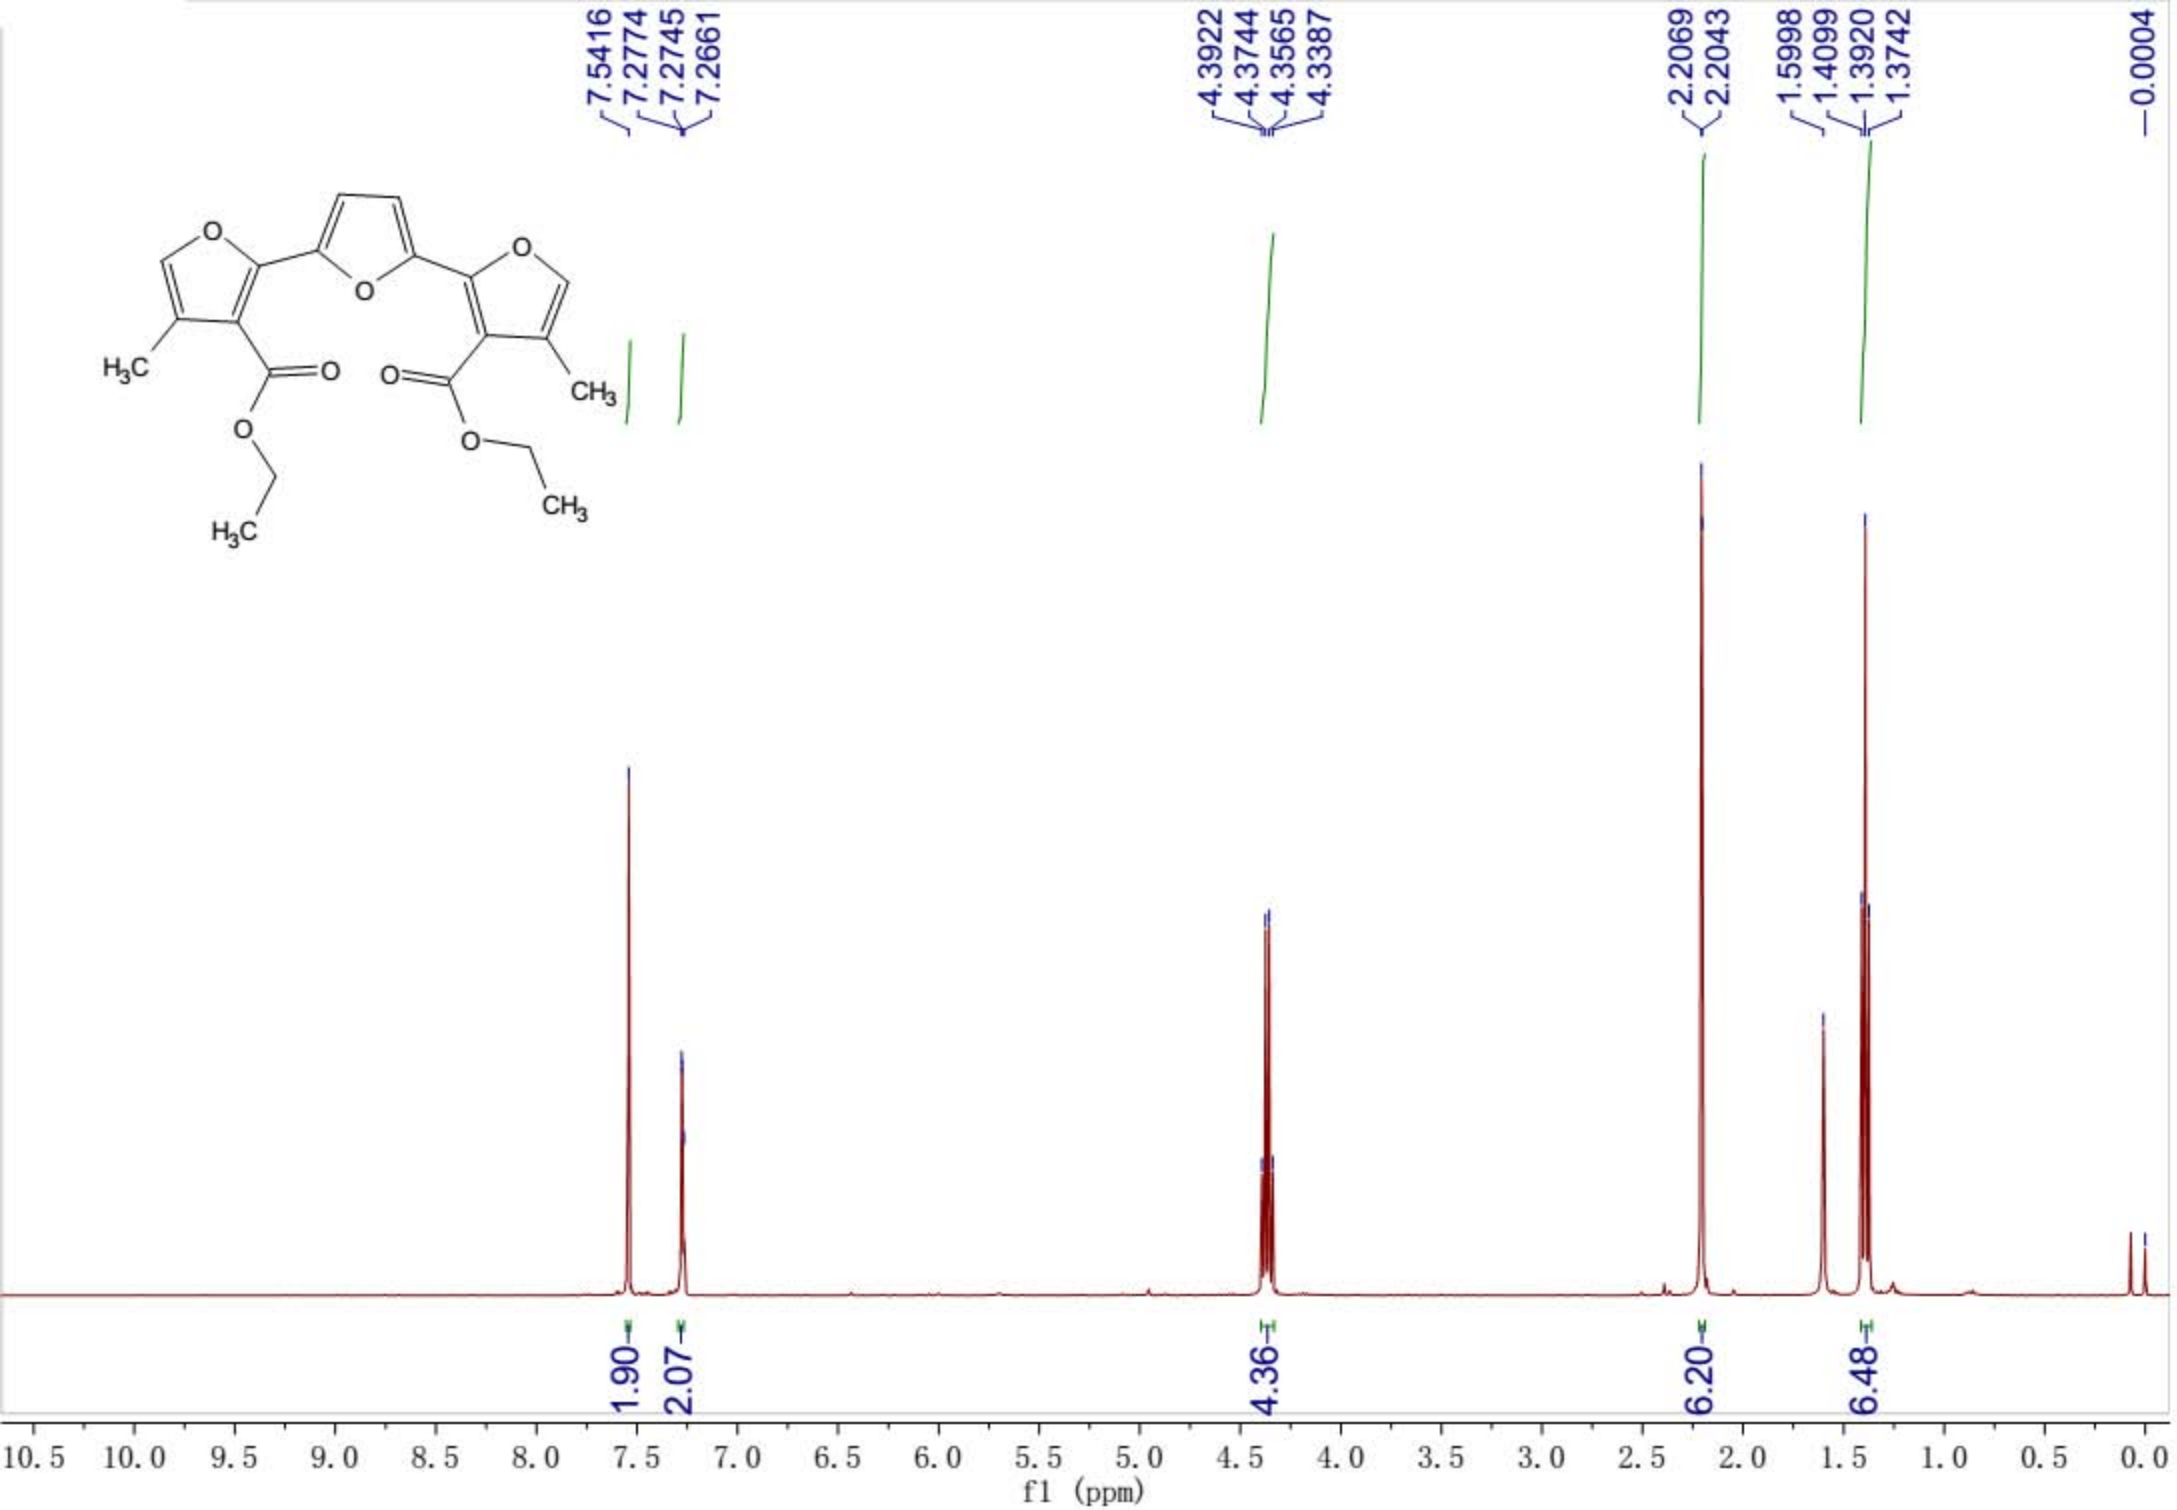

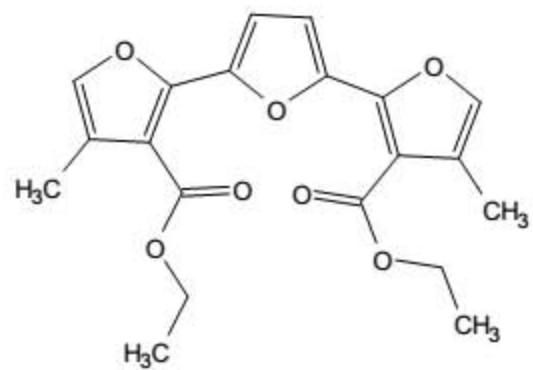

— 163.8364

~ 149.0528

~ 145.0827

~ 139.6928

— 122.6580

~ 114.7650

~ 114.2180

~ 77.4771

~ 77.1596

~ 76.8420

— 60.6344

— 14.4185

— 10.5122

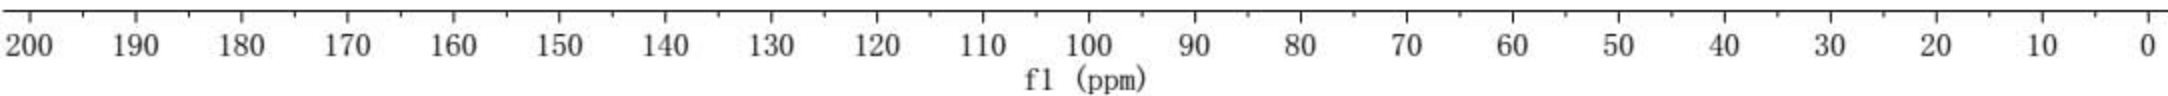

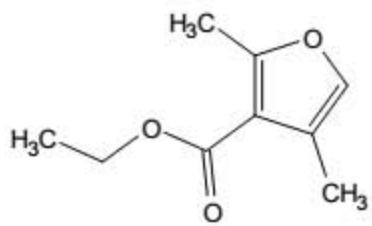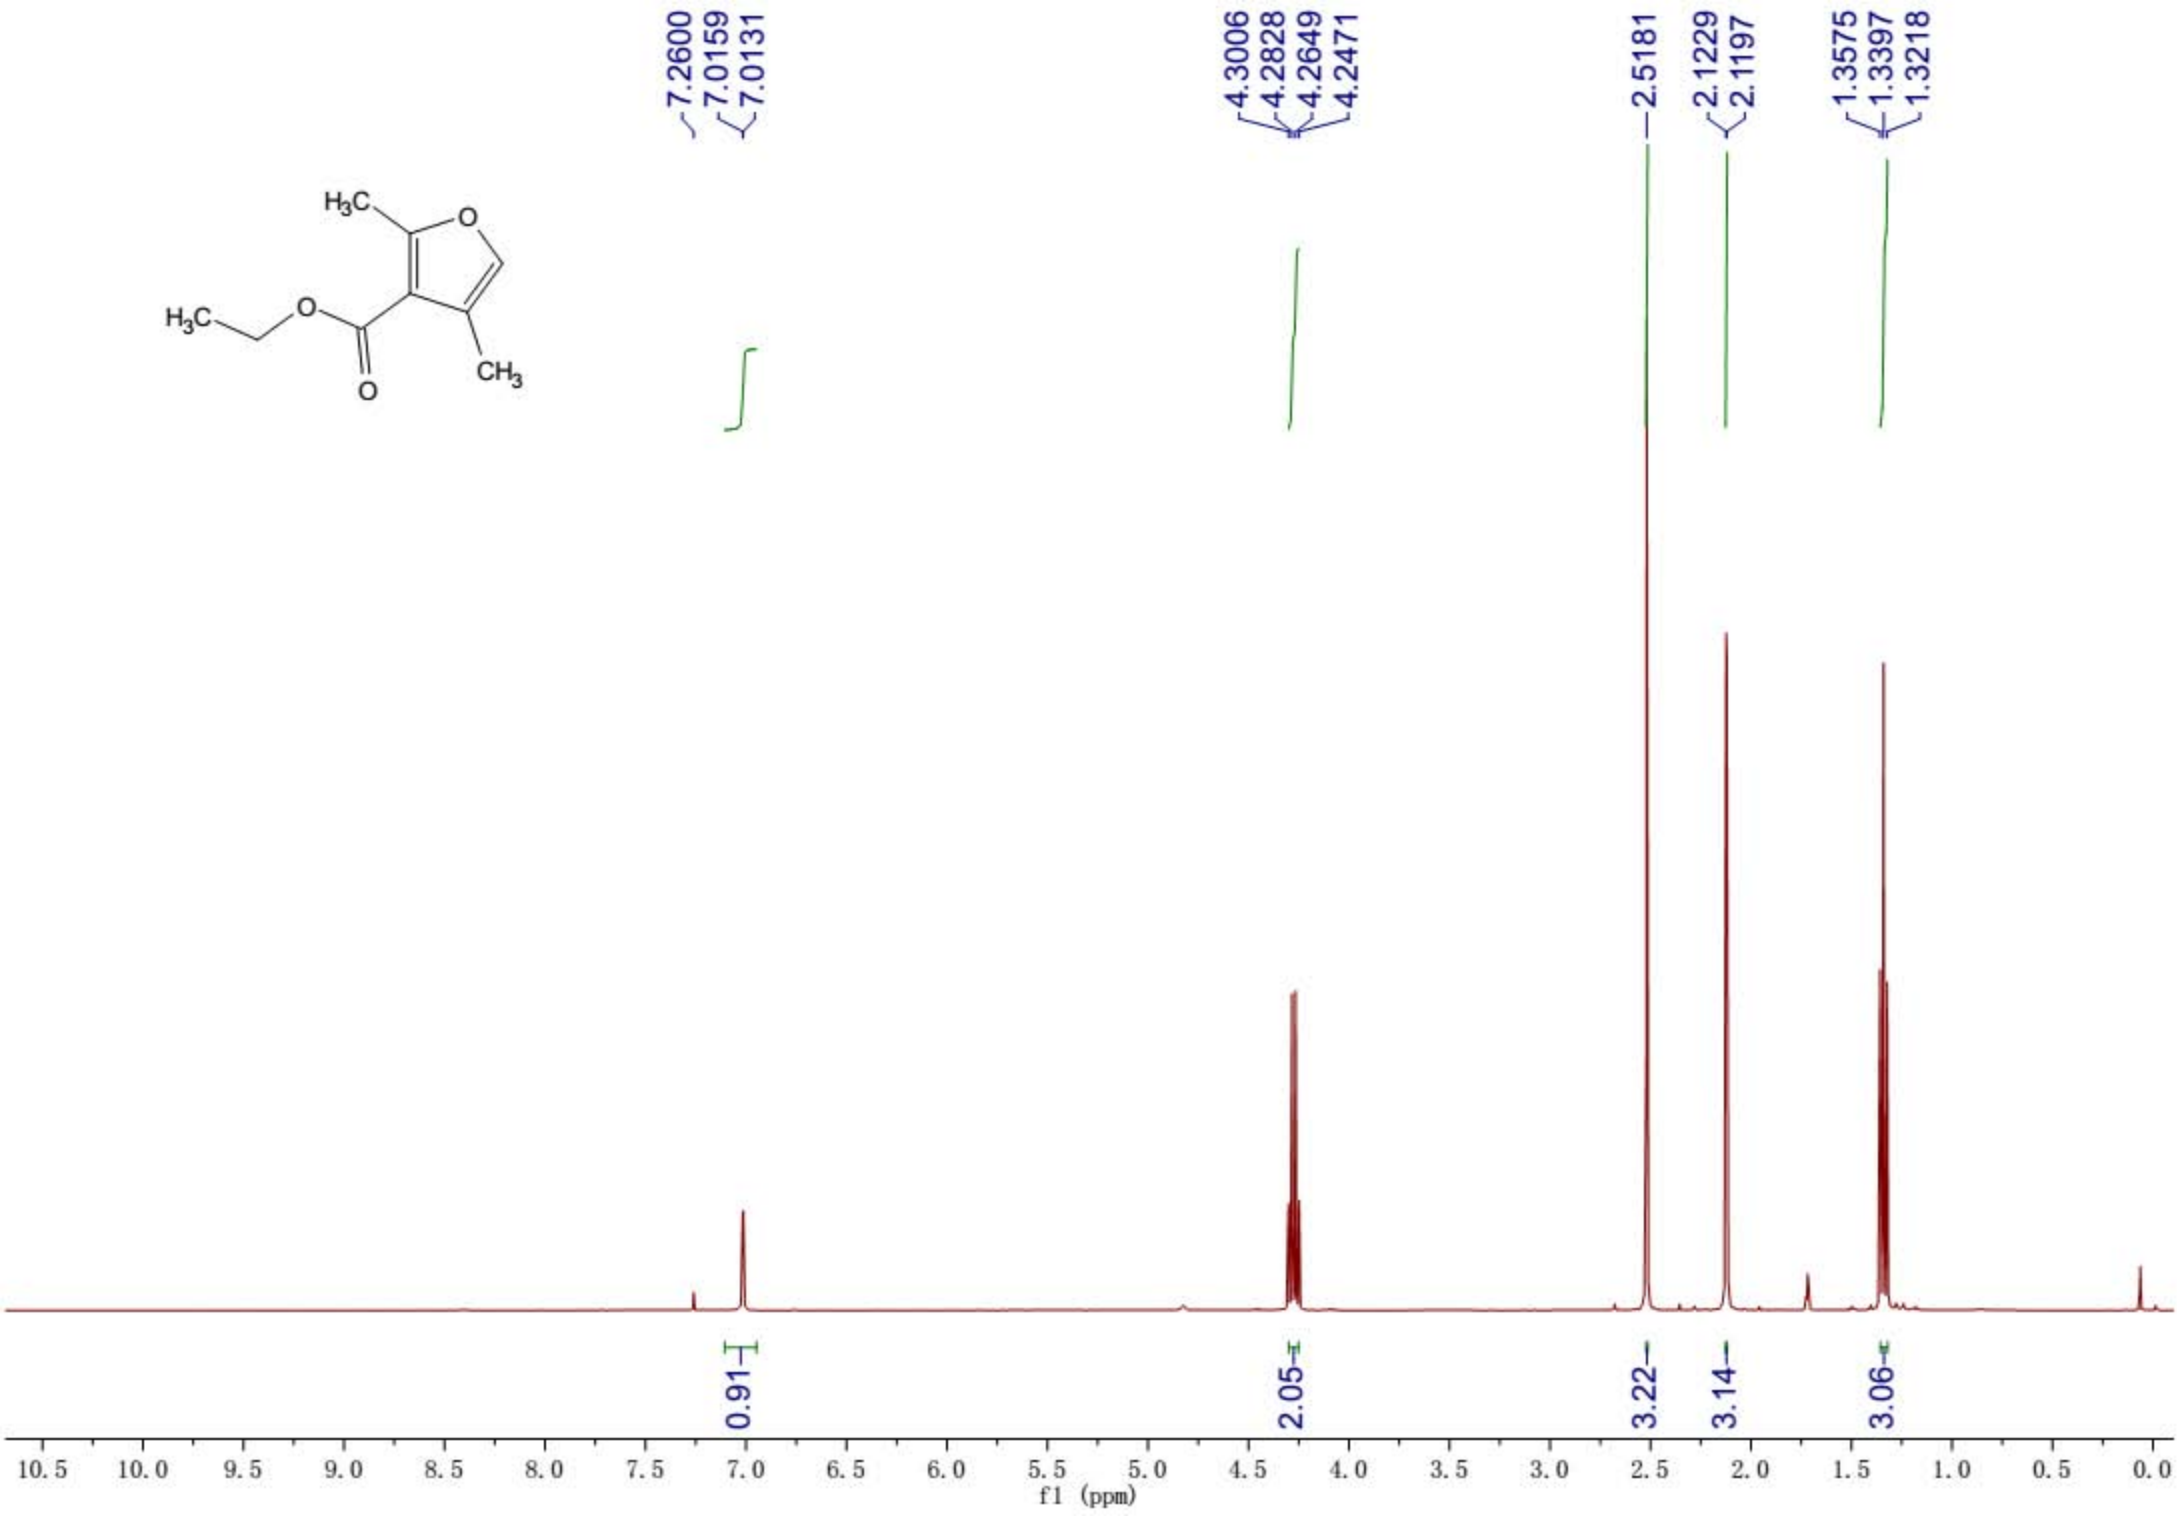

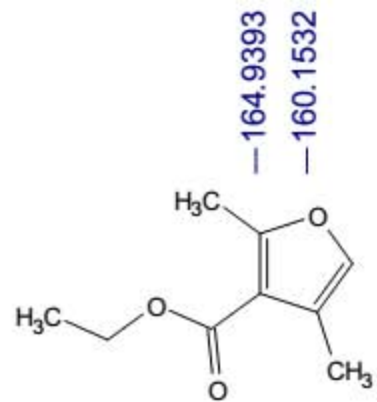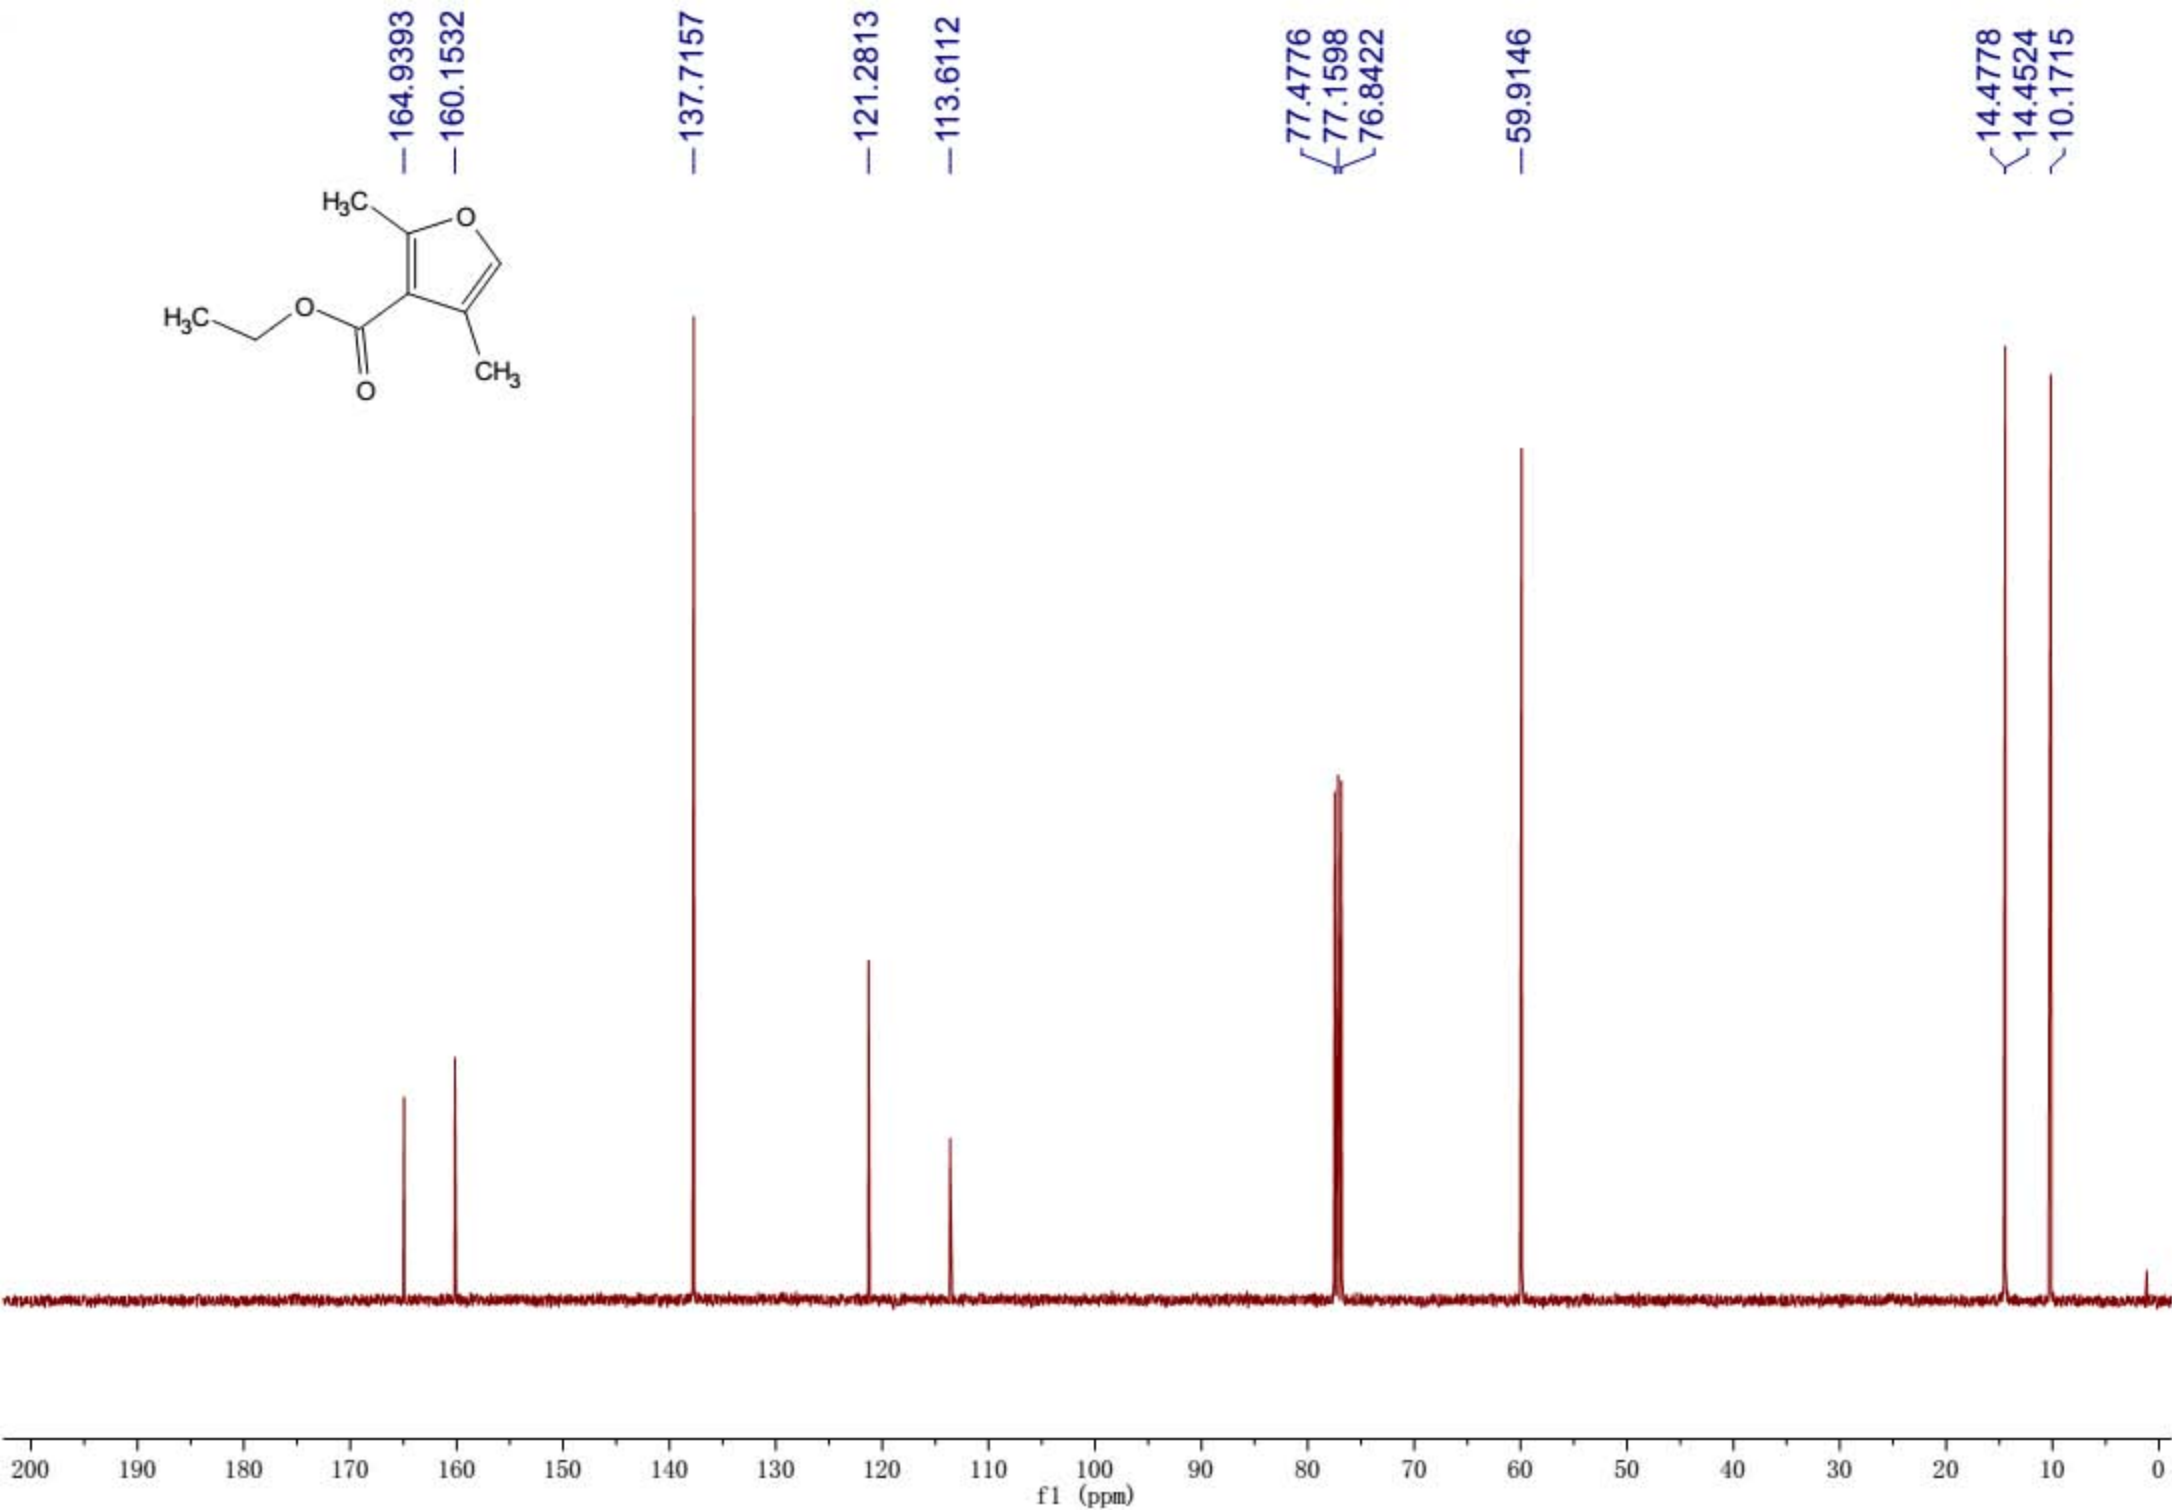

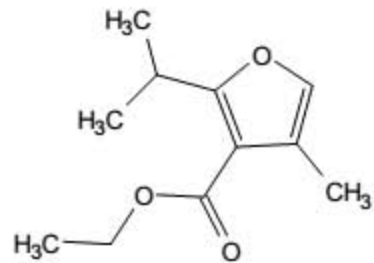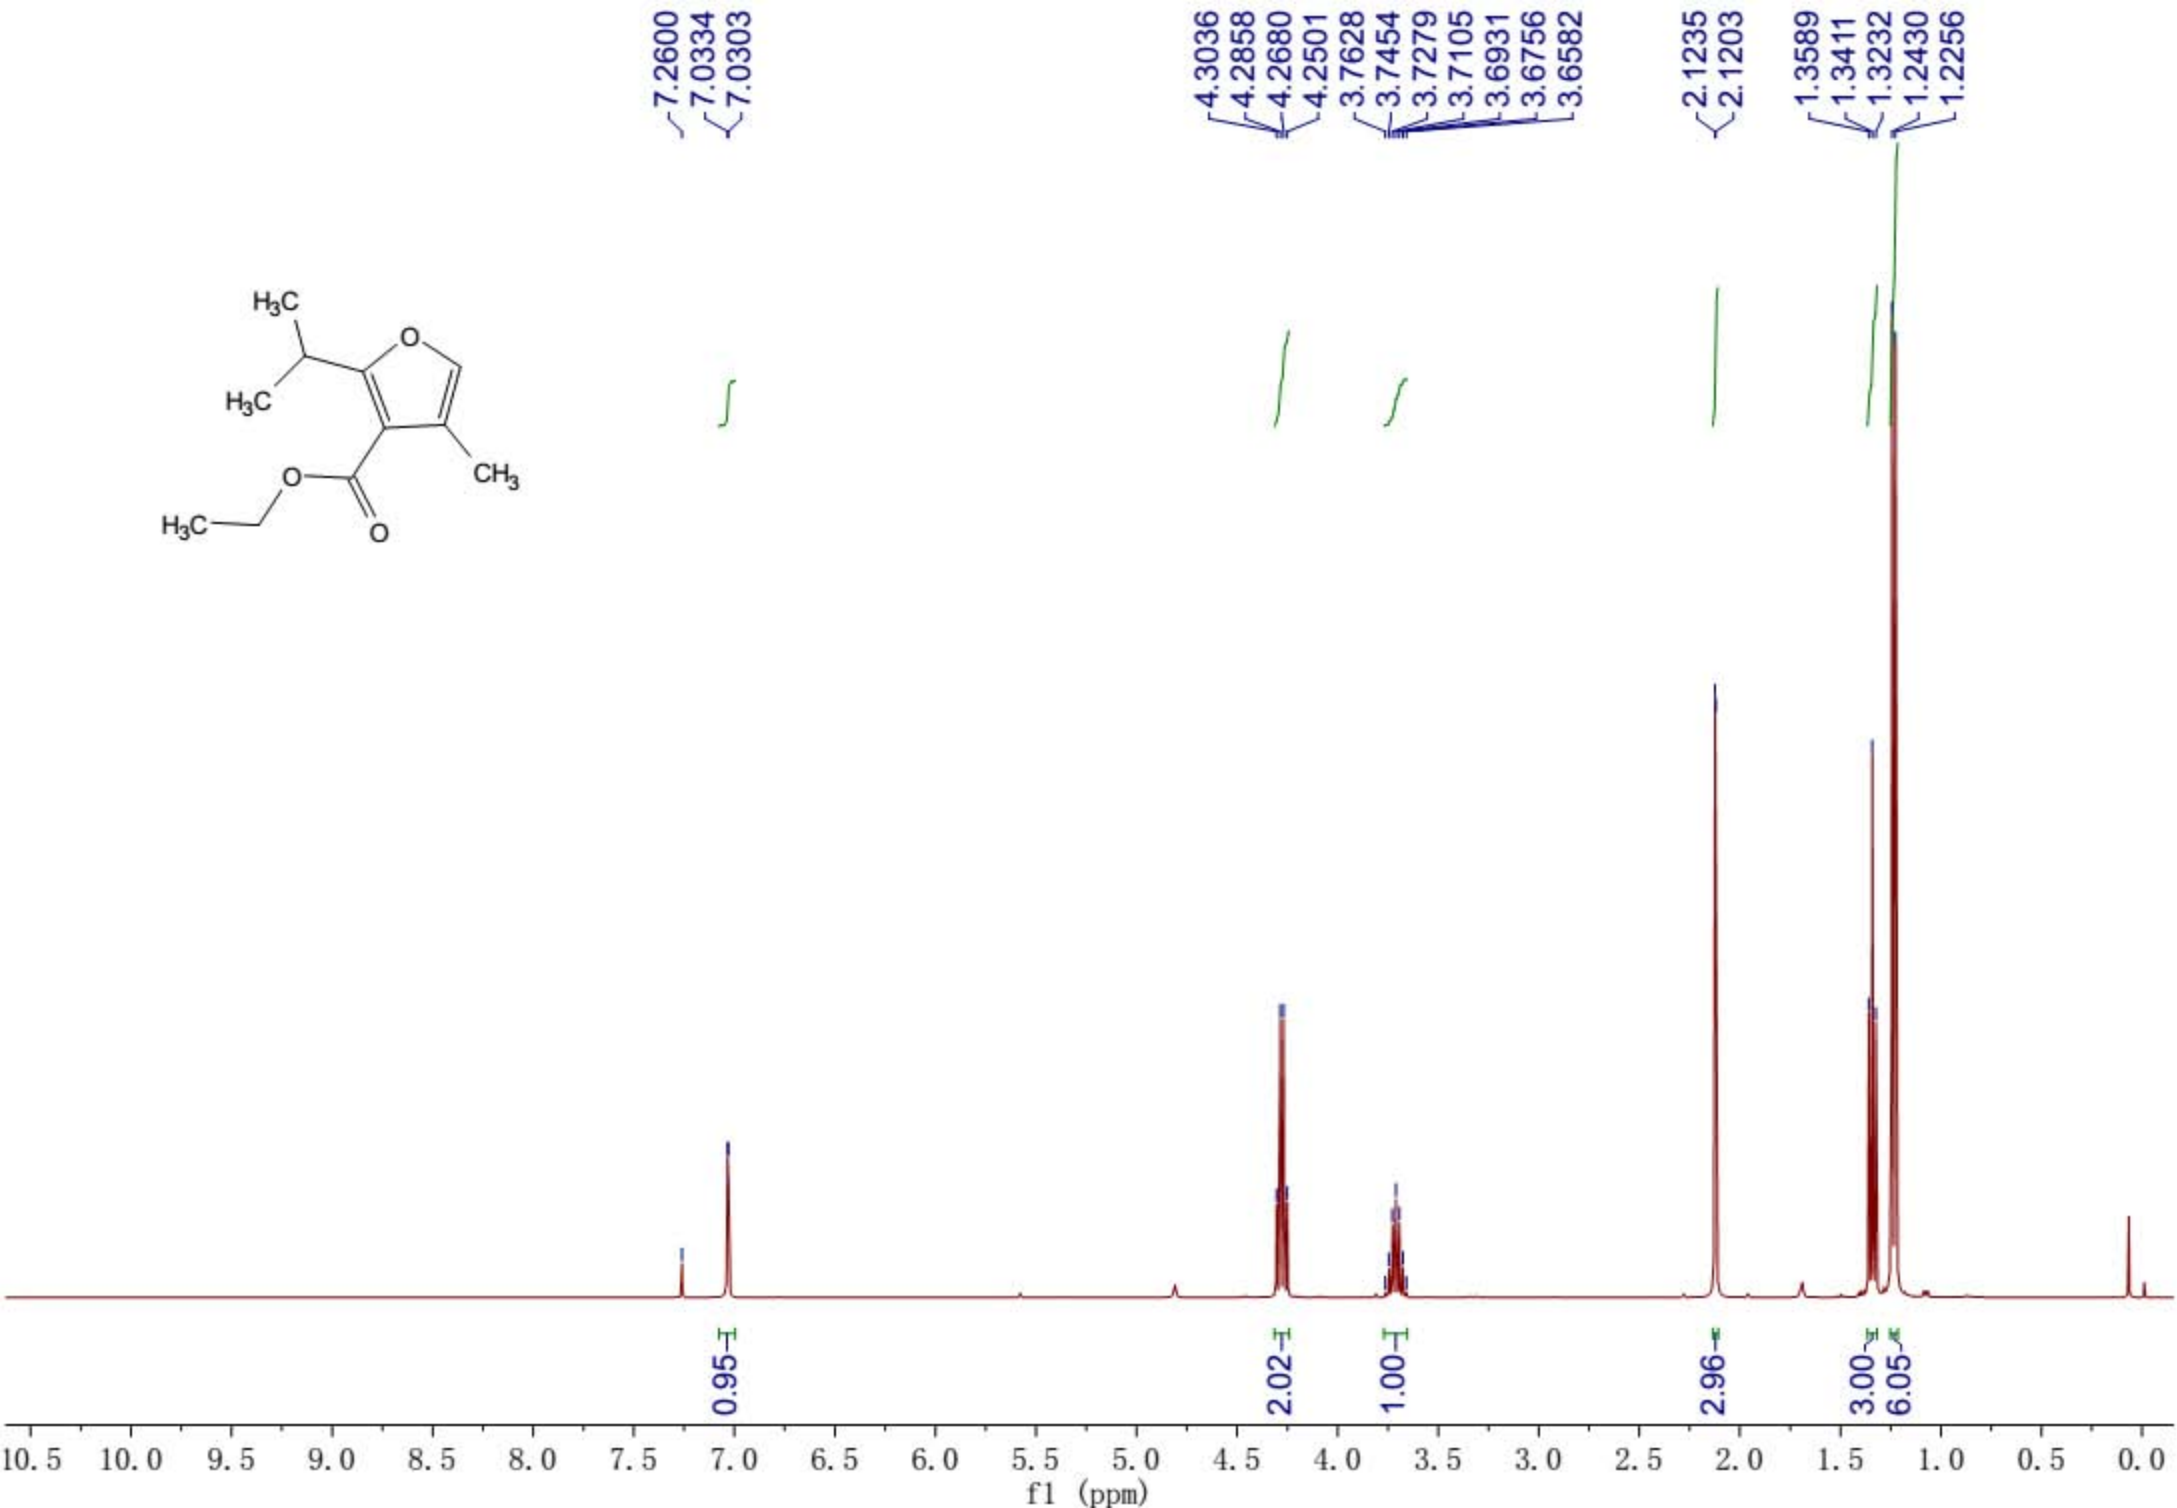

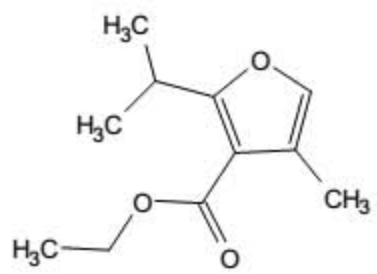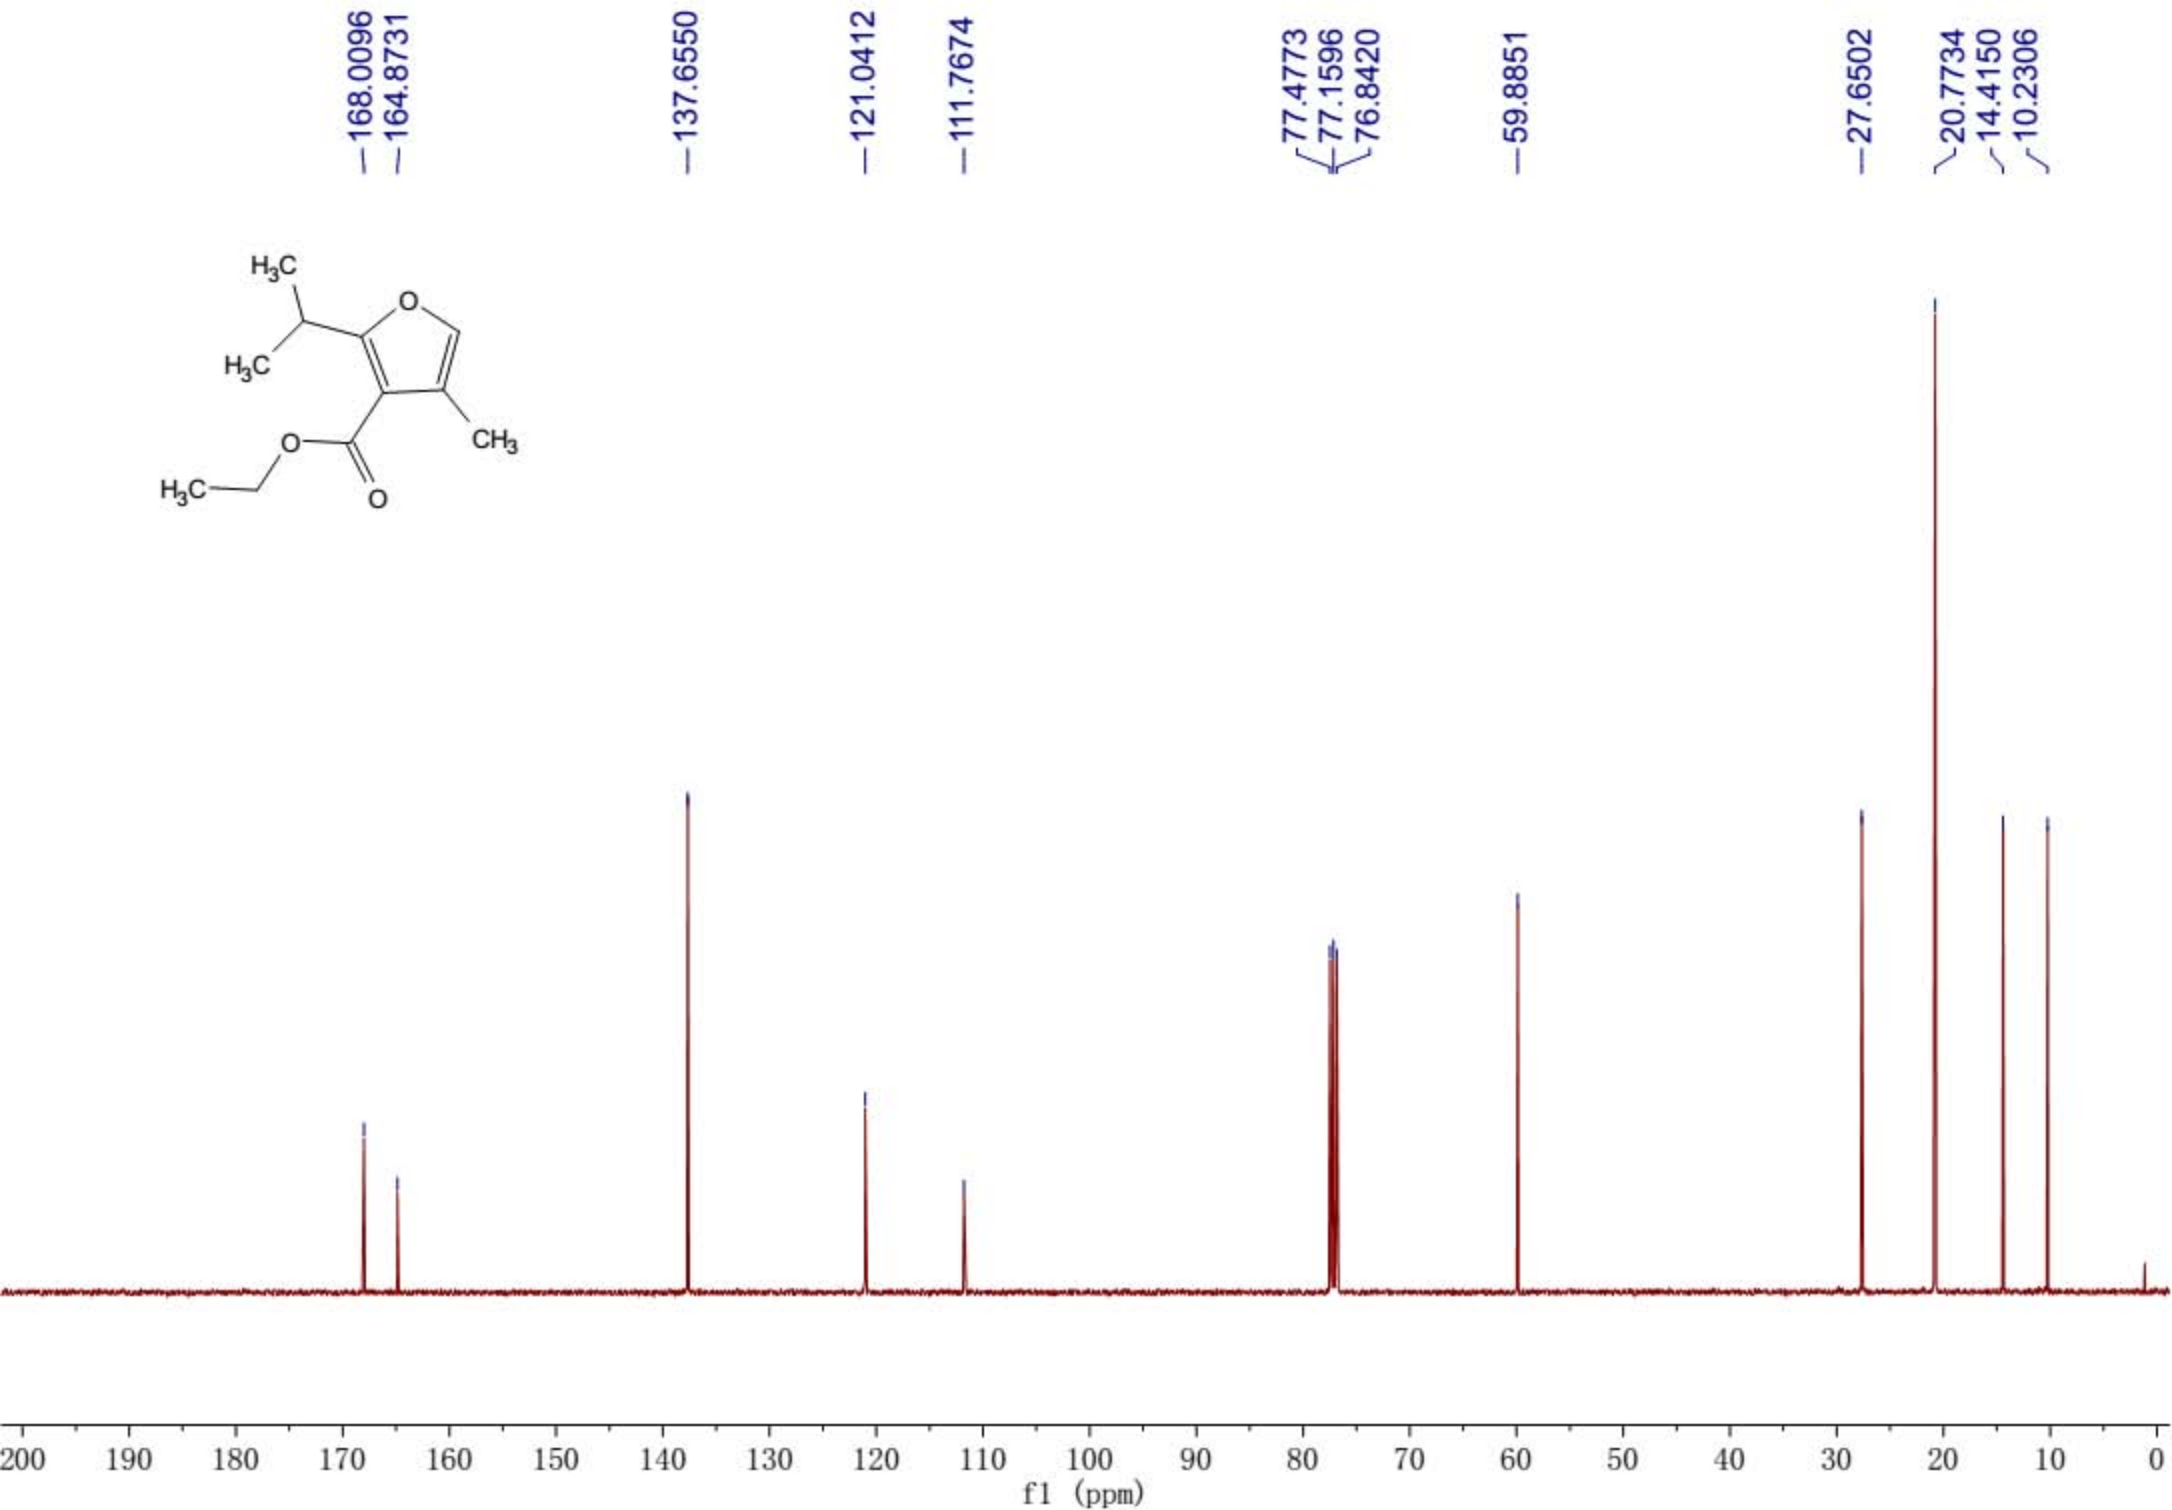

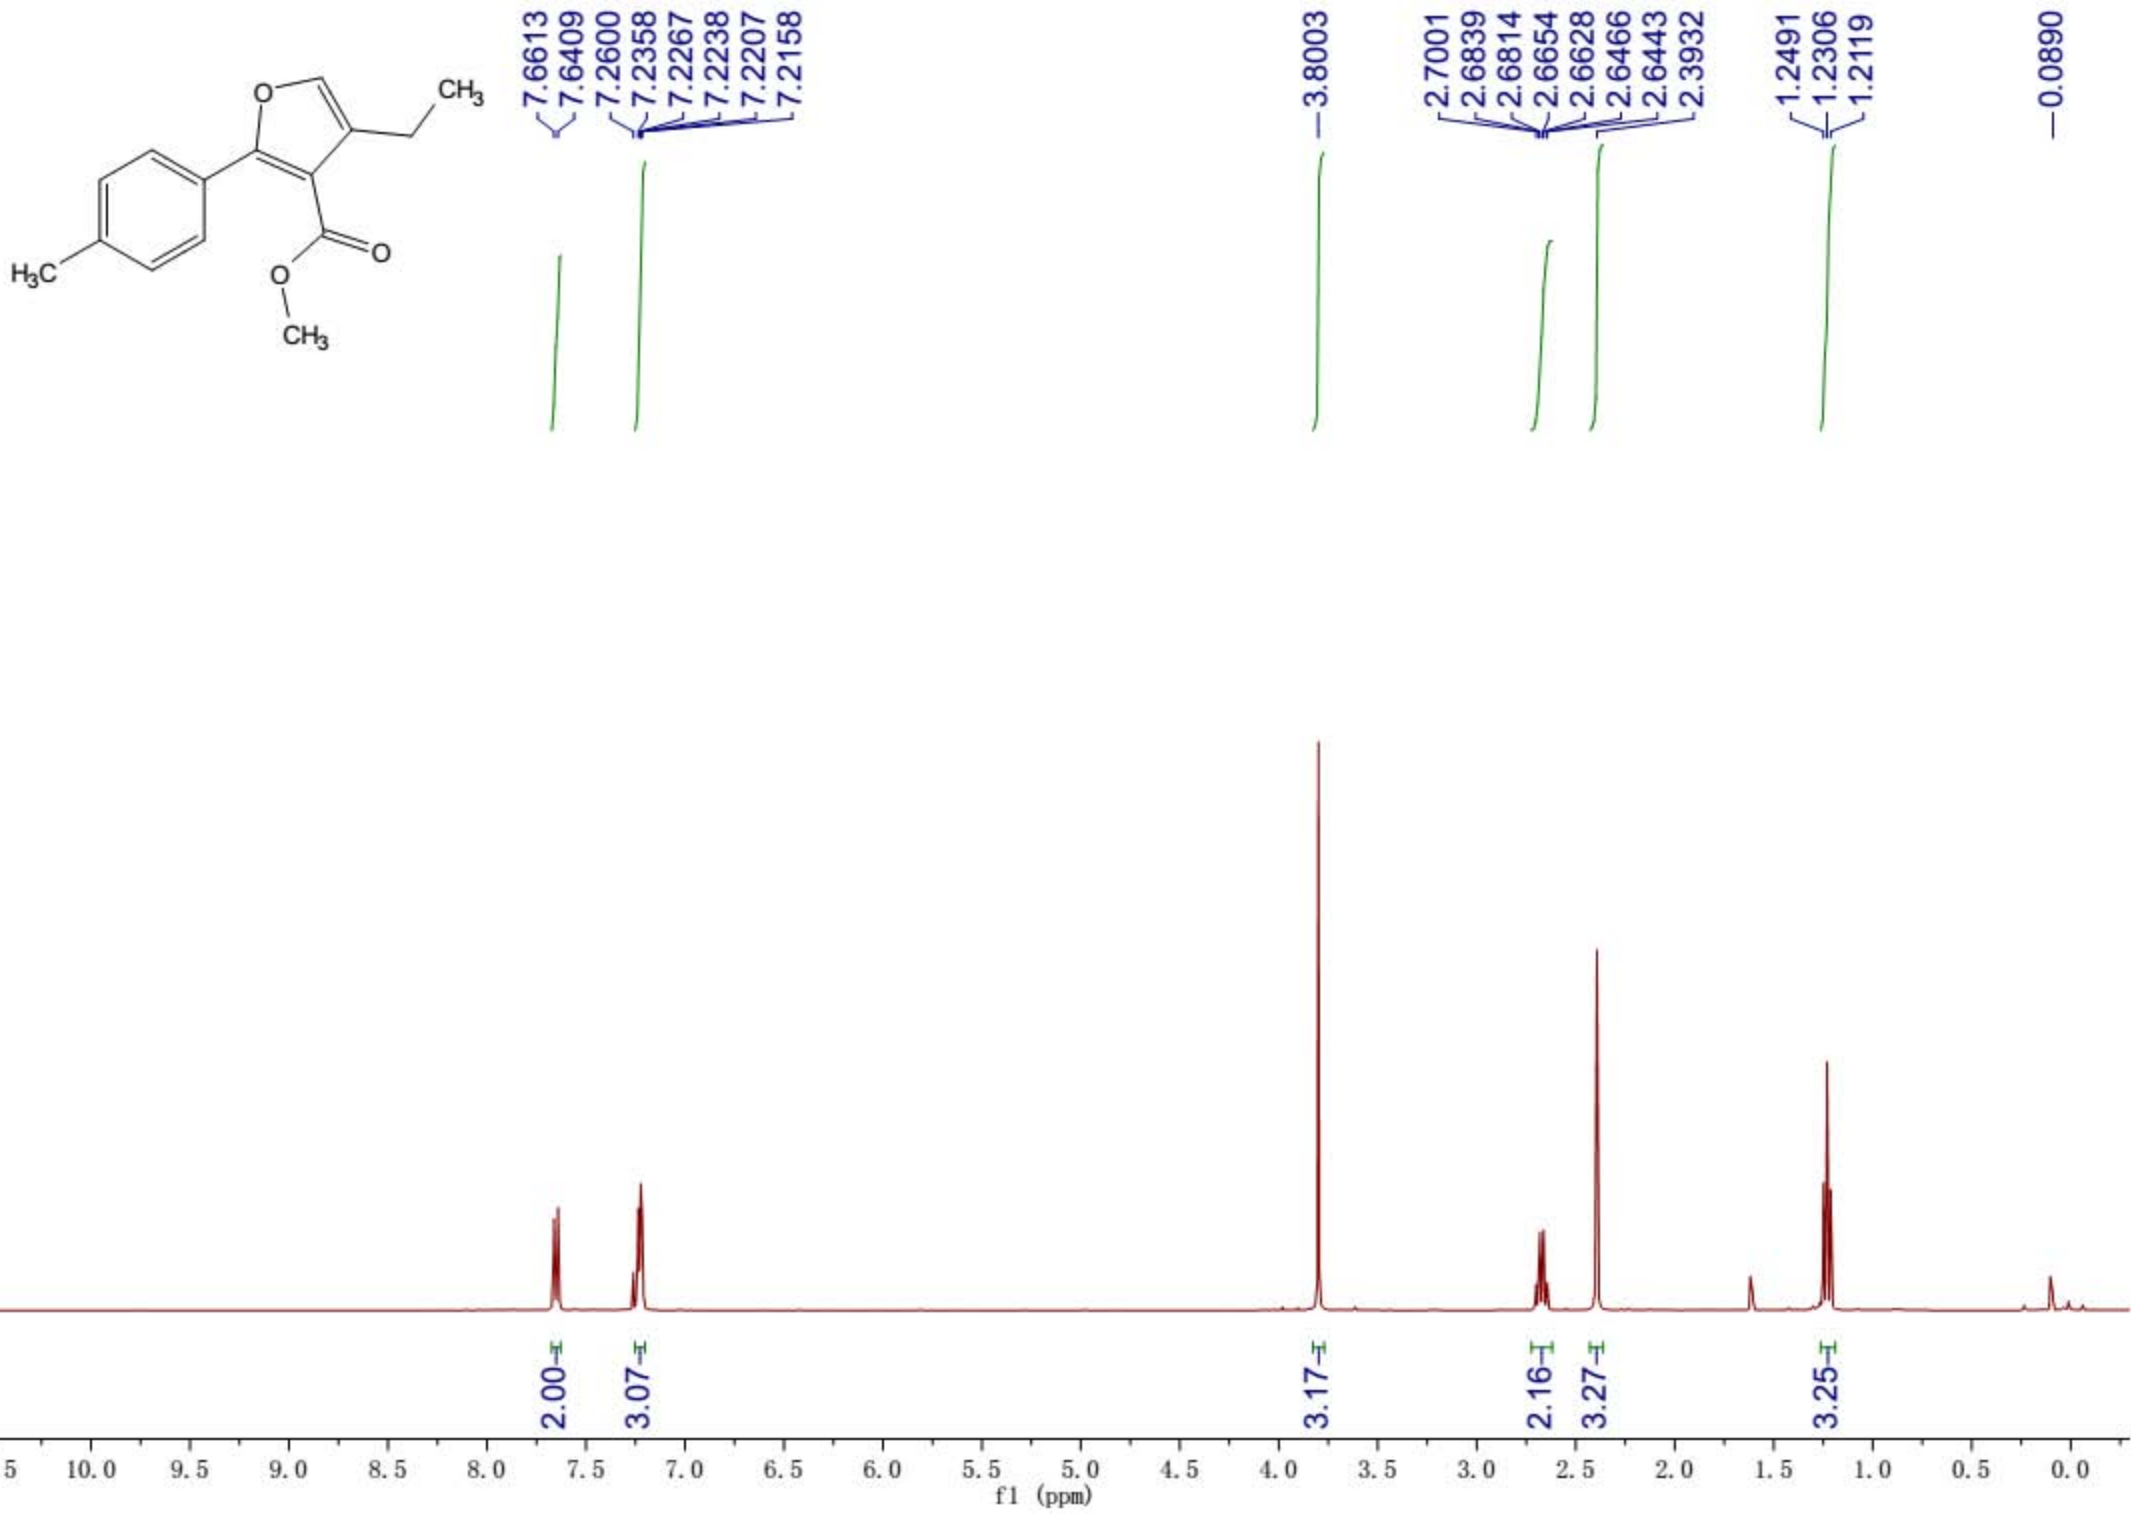

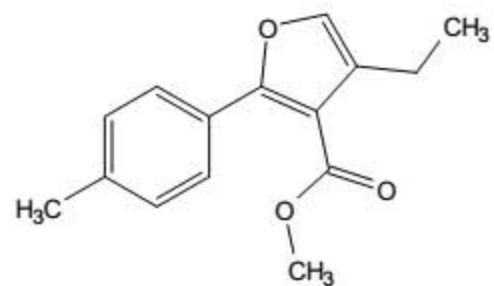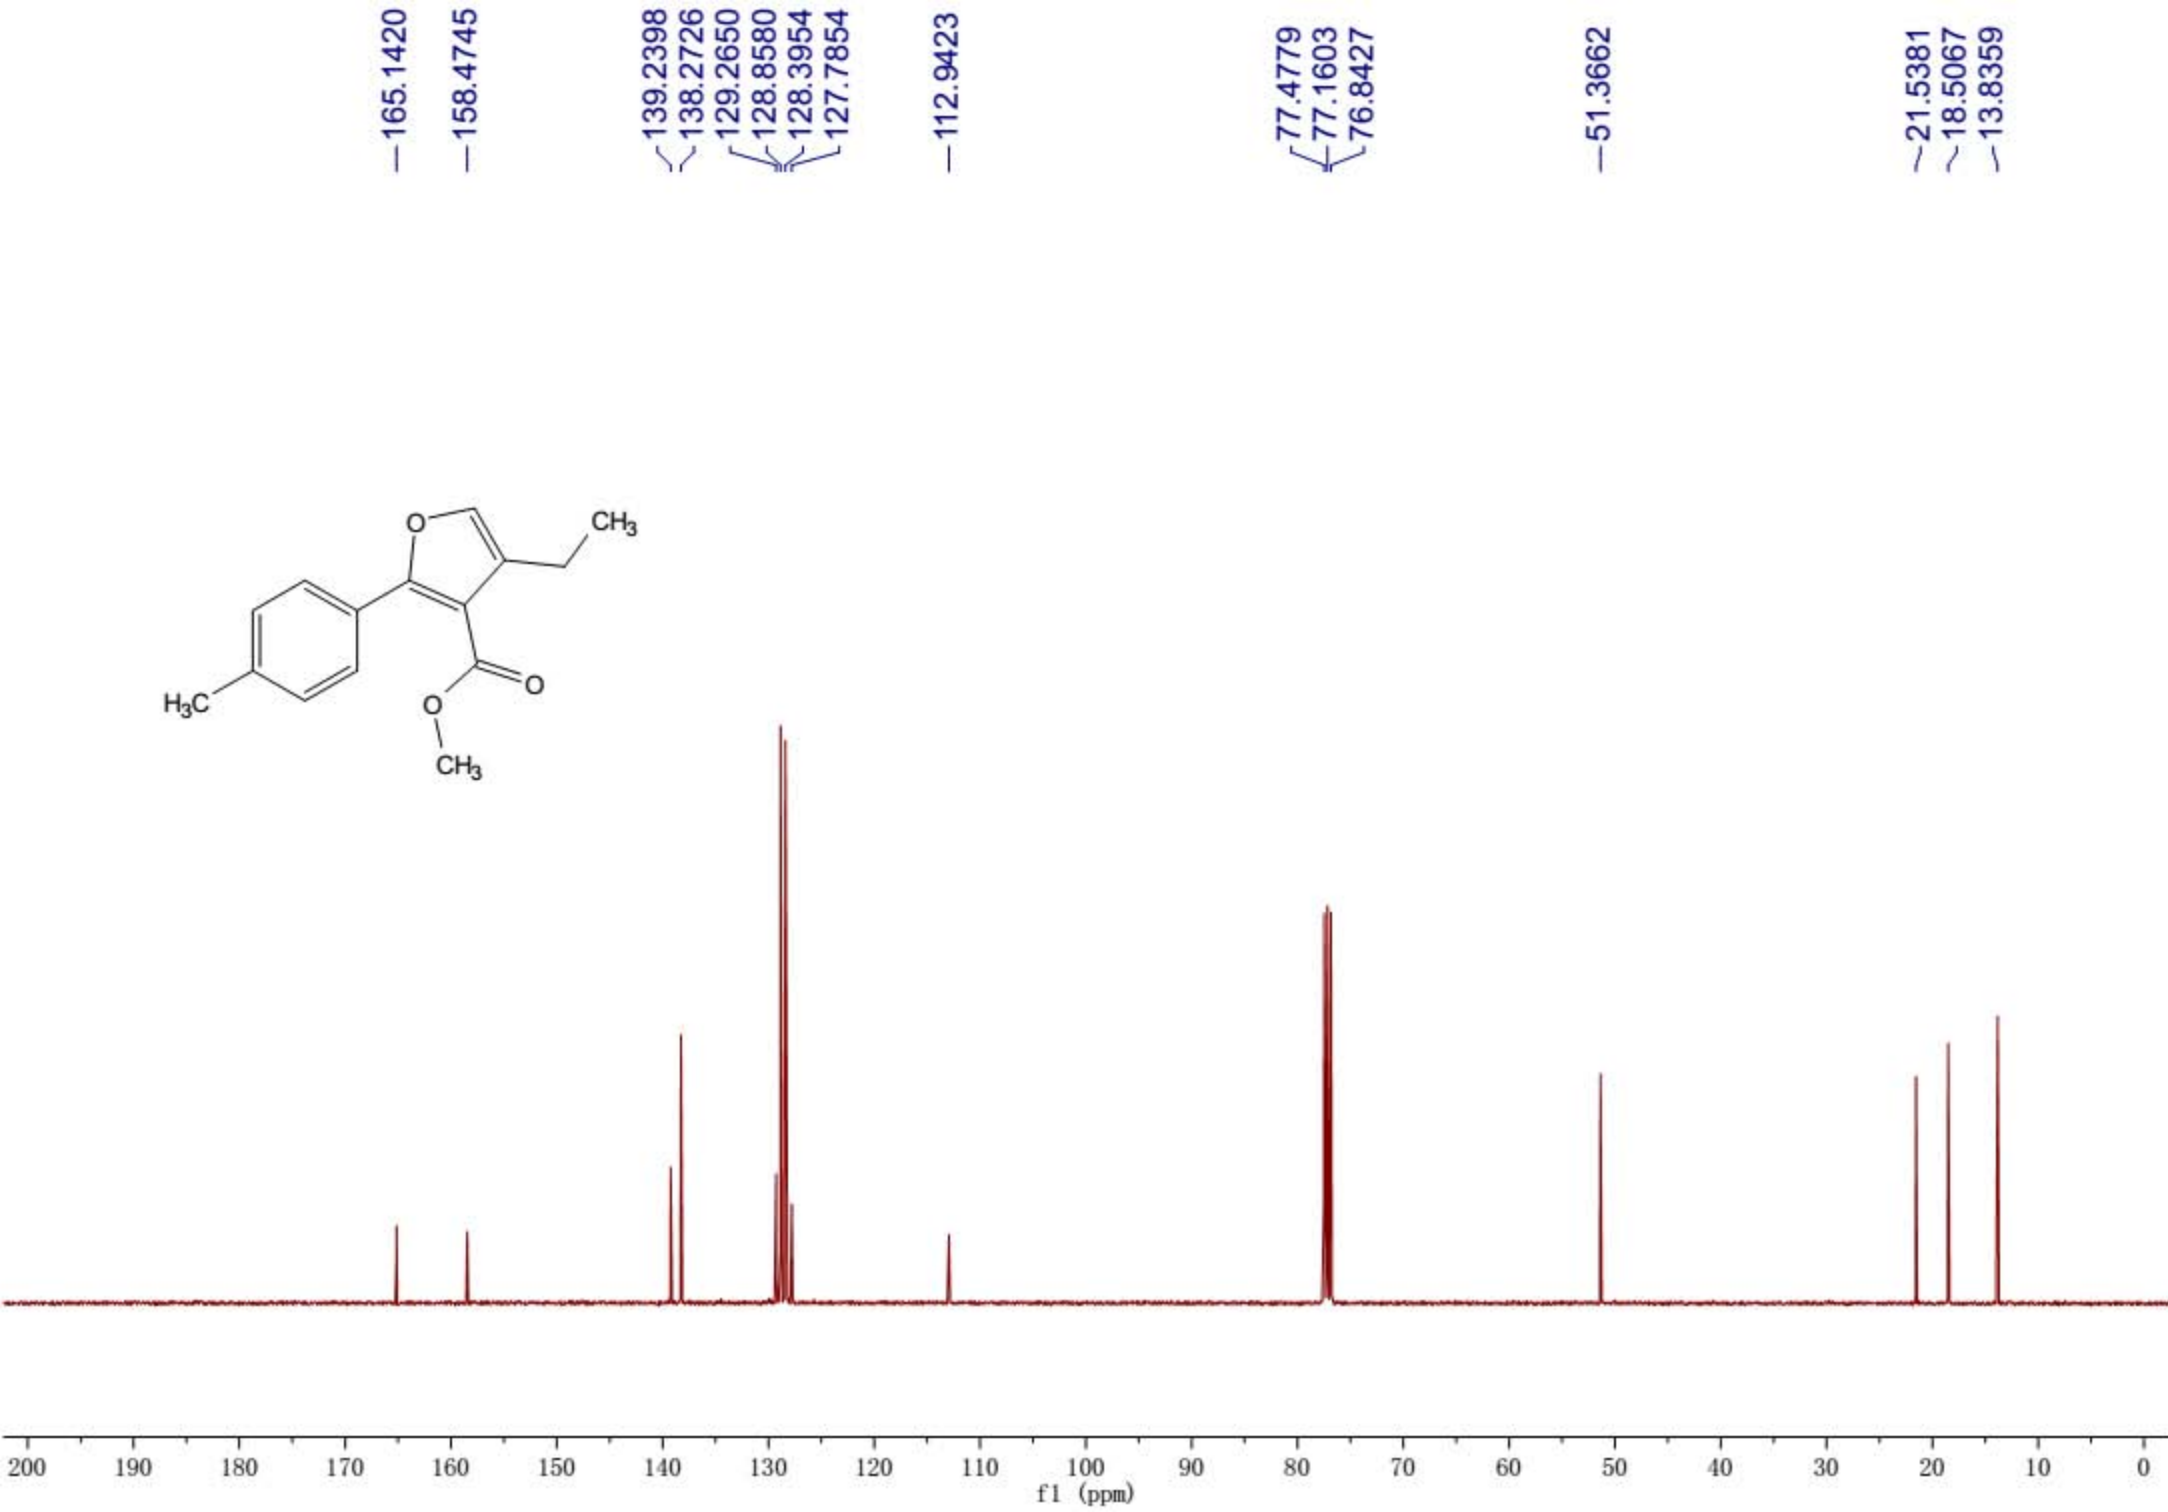



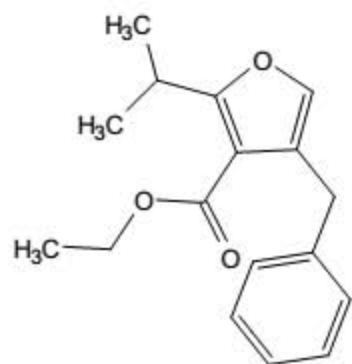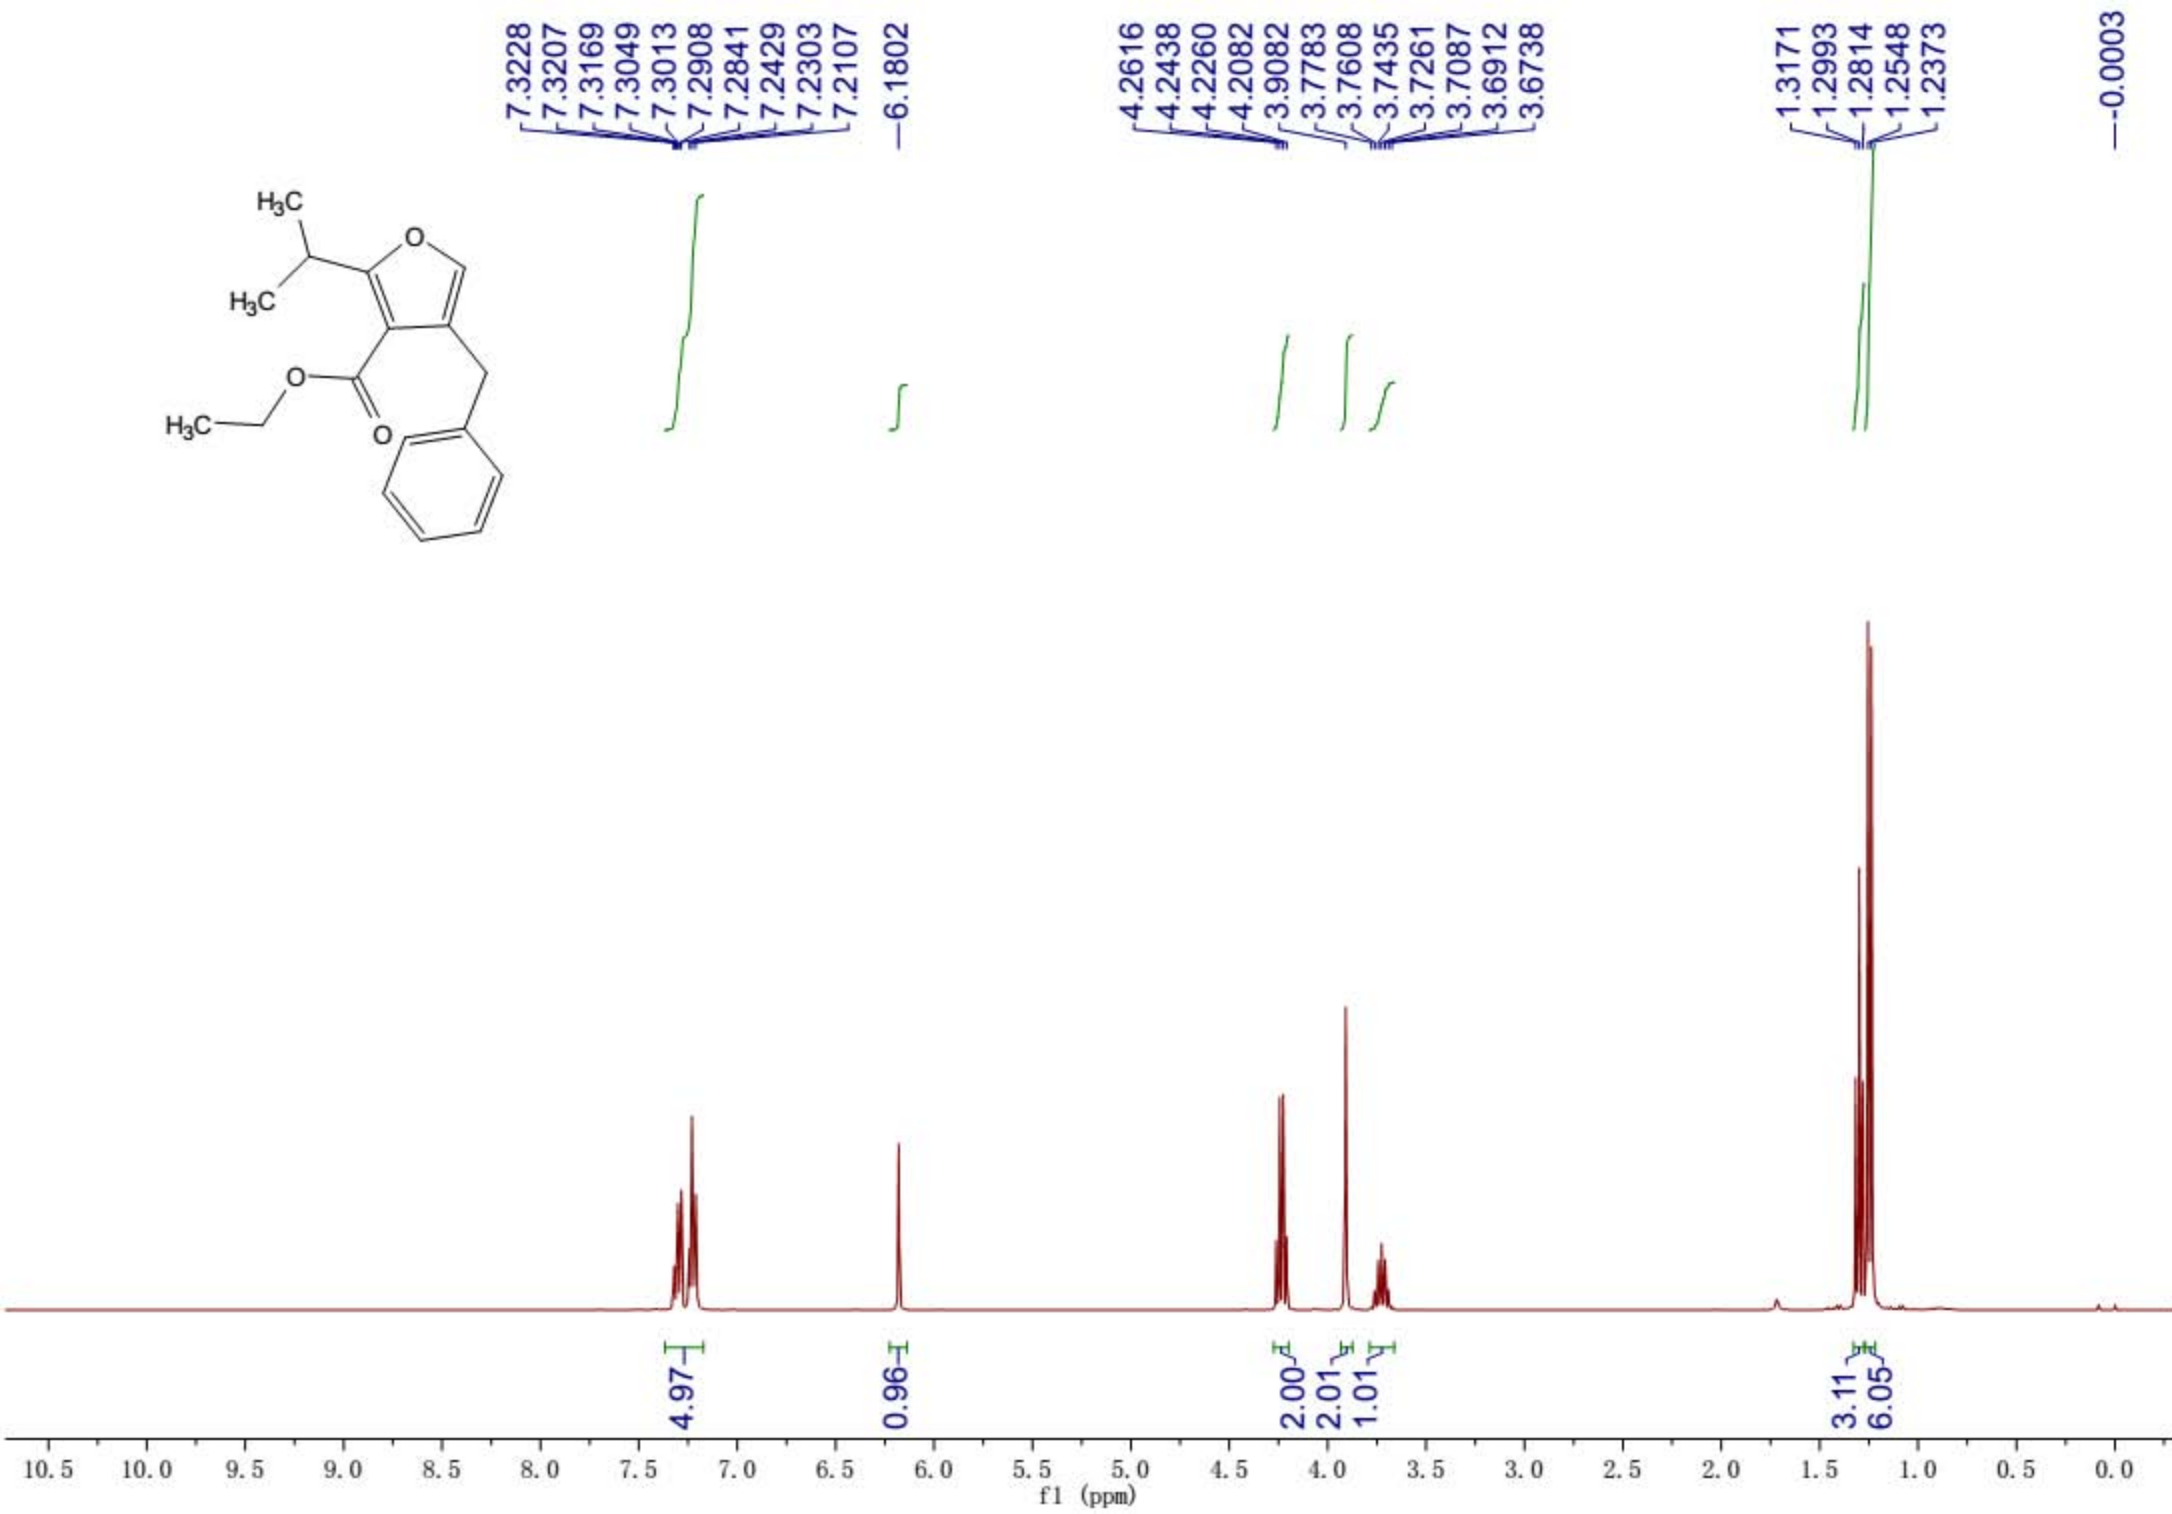

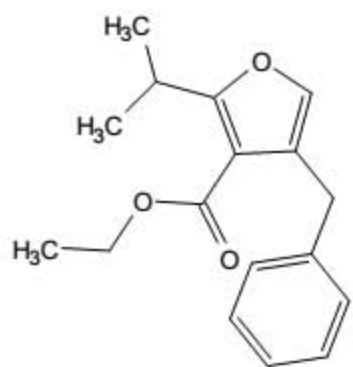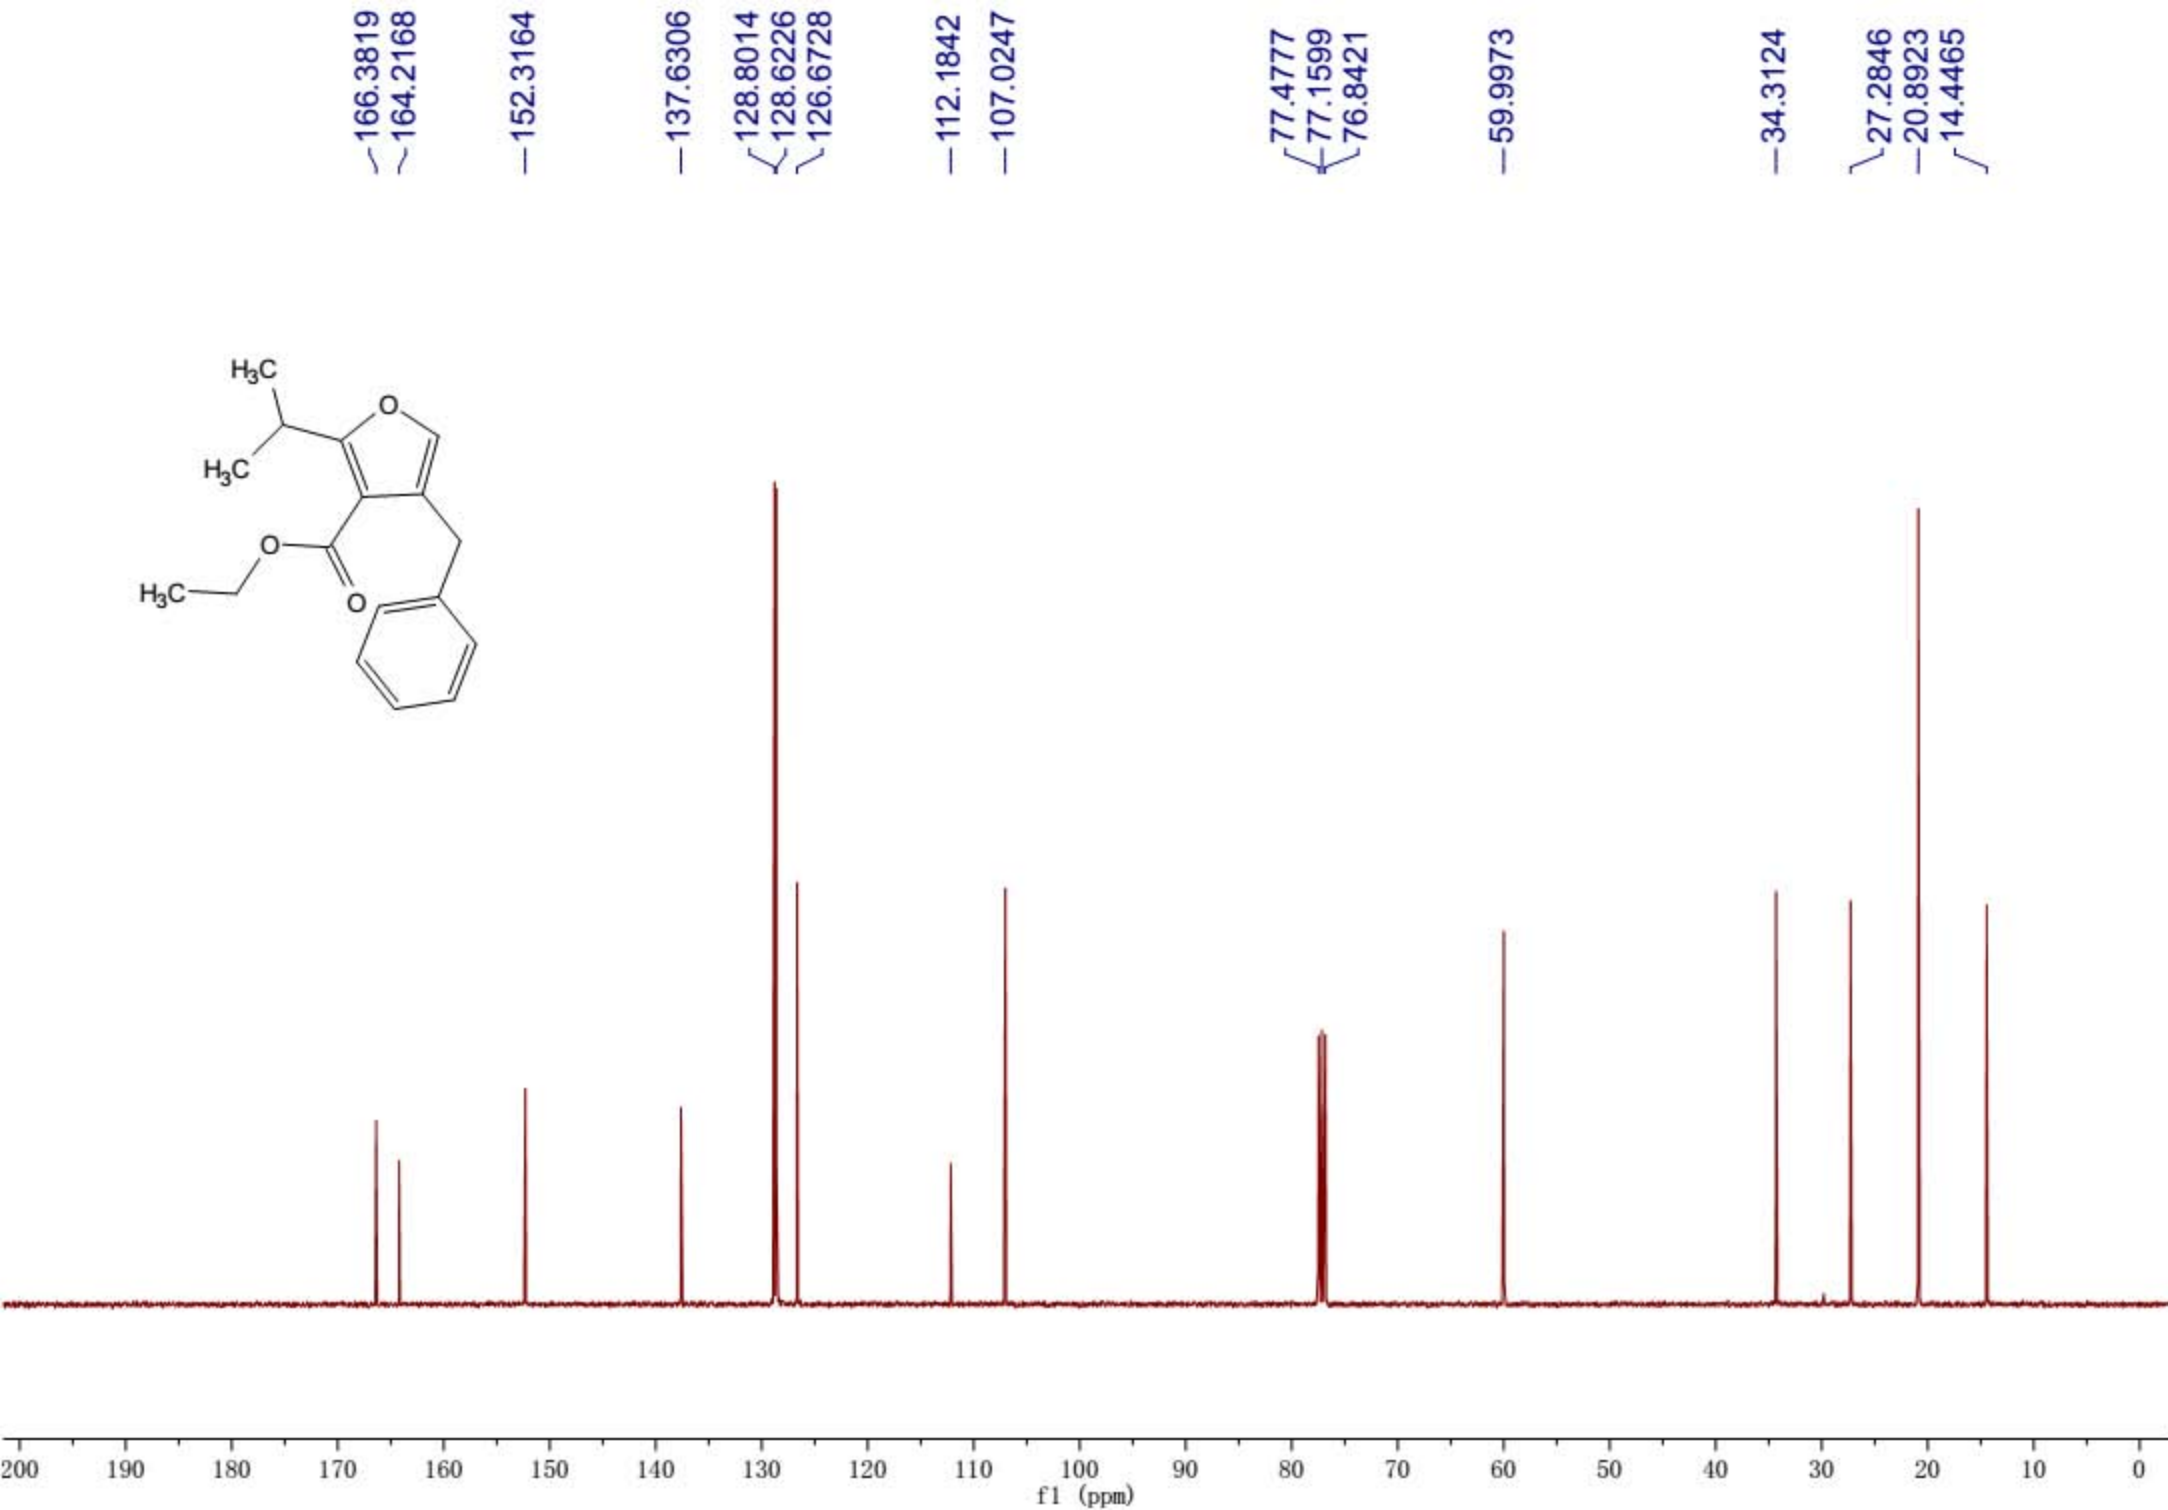

Supplement: c5ra14273c1.pdf [file c5ra14273c1.pdf]
